# Supplementary material for: Improvement of Heat Release Rate Measurement from Woods Based on Their Combustion Products Temperature Rise
Source: MDPI journal article supplement (doi:10.3390/pr11041206), 2023-04-14
Supplement: s1 [file s1]

**Table S3.** Predicted and true values of  $c$  and  $n$  for Iroko, Pine and Paulownia wood.

| Sample<br>(-) | Time<br>(s) | $c$ Predicted<br>(kJ mol <sup>-1</sup> K <sup>-1</sup> ) | $n$ Predicted<br>(mol s <sup>-1</sup> ) | $c$ True<br>(kJ mol <sup>-1</sup> K <sup>-1</sup> ) | $n$ True<br>(mol s <sup>-1</sup> ) |
|---------------|-------------|----------------------------------------------------------|-----------------------------------------|-----------------------------------------------------|------------------------------------|
| Iroko         | 0           | 0.27724                                                  | 0.88334                                 | 0.40221                                             | 0.84161                            |
| Iroko         | 5           | 0.12024                                                  | 0.84117                                 | 0.21184                                             | 0.81984                            |
| Iroko         | 10          | 0.09184                                                  | 0.83133                                 | 0.13470                                             | 0.81026                            |
| Iroko         | 15          | 0.08128                                                  | 0.83107                                 | 0.09877                                             | 0.80585                            |
| Iroko         | 20          | 0.07494                                                  | 0.83075                                 | 0.08194                                             | 0.80291                            |
| Iroko         | 25          | 0.07058                                                  | 0.83039                                 | 0.07451                                             | 0.80094                            |
| Iroko         | 30          | 0.06723                                                  | 0.83004                                 | 0.06950                                             | 0.79955                            |
| Iroko         | 35          | 0.06451                                                  | 0.82965                                 | 0.06480                                             | 0.79835                            |
| Iroko         | 40          | 0.06233                                                  | 0.82968                                 | 0.06258                                             | 0.79807                            |
| Iroko         | 45          | 0.06046                                                  | 0.82982                                 | 0.05995                                             | 0.79804                            |
| Iroko         | 50          | 0.05884                                                  | 0.83006                                 | 0.05979                                             | 0.79823                            |
| Iroko         | 55          | 0.05742                                                  | 0.83034                                 | 0.05651                                             | 0.79853                            |
| Iroko         | 60          | 0.05617                                                  | 0.83069                                 | 0.05628                                             | 0.79896                            |
| Iroko         | 65          | 0.05510                                                  | 0.83132                                 | 0.05554                                             | 0.79993                            |
| Iroko         | 70          | 0.05411                                                  | 0.83158                                 | 0.05446                                             | 0.80031                            |
| Iroko         | 75          | 0.05326                                                  | 0.83194                                 | 0.05497                                             | 0.80091                            |
| Iroko         | 80          | 0.05250                                                  | 0.83227                                 | 0.05458                                             | 0.80154                            |
| Iroko         | 85          | 0.05182                                                  | 0.83260                                 | 0.05416                                             | 0.80212                            |
| Iroko         | 90          | 0.05123                                                  | 0.83293                                 | 0.05262                                             | 0.80287                            |
| Iroko         | 95          | 0.05069                                                  | 0.83311                                 | 0.05195                                             | 0.80333                            |
| Iroko         | 100         | 0.05022                                                  | 0.83316                                 | 0.05195                                             | 0.80344                            |
| Iroko         | 105         | 0.04980                                                  | 0.83323                                 | 0.05082                                             | 0.80362                            |
| Iroko         | 110         | 0.04942                                                  | 0.83335                                 | 0.05080                                             | 0.80397                            |
| Iroko         | 115         | 0.04910                                                  | 0.83344                                 | 0.05149                                             | 0.80428                            |
| Iroko         | 120         | 0.04880                                                  | 0.83356                                 | 0.05138                                             | 0.80468                            |
| Iroko         | 125         | 0.04854                                                  | 0.83360                                 | 0.05108                                             | 0.80485                            |
| Iroko         | 130         | 0.04831                                                  | 0.83370                                 | 0.04926                                             | 0.80514                            |
| Iroko         | 135         | 0.04810                                                  | 0.83375                                 | 0.04962                                             | 0.80550                            |
| Iroko         | 140         | 0.04791                                                  | 0.83381                                 | 0.04980                                             | 0.80574                            |
| Iroko         | 145         | 0.04772                                                  | 0.83398                                 | 0.04893                                             | 0.80628                            |
| Iroko         | 150         | 0.04756                                                  | 0.83410                                 | 0.04913                                             | 0.80665                            |
| Iroko         | 155         | 0.04739                                                  | 0.83431                                 | 0.04878                                             | 0.80717                            |
| Iroko         | 160         | 0.04725                                                  | 0.83444                                 | 0.05009                                             | 0.80746                            |
| Iroko         | 165         | 0.04707                                                  | 0.83481                                 | 0.04909                                             | 0.80810                            |
| Iroko         | 170         | 0.04689                                                  | 0.83521                                 | 0.04944                                             | 0.80866                            |
| Iroko         | 175         | 0.04678                                                  | 0.83530                                 | 0.04781                                             | 0.80874                            |
| Iroko         | 180         | 0.04667                                                  | 0.83538                                 | 0.04808                                             | 0.80881                            |
| Iroko         | 185         | 0.04655                                                  | 0.83559                                 | 0.04806                                             | 0.80903                            |
| Iroko         | 190         | 0.04648                                                  | 0.83556                                 | 0.04859                                             | 0.80896                            |
| Iroko         | 195         | 0.04637                                                  | 0.83574                                 | 0.04794                                             | 0.80909                            |
| Iroko         | 200         | 0.04624                                                  | 0.83608                                 | 0.04884                                             | 0.80936                            |

**Table S3.** Predicted and true values of  $c$  and  $n$  for Iroko, Pine and Paulownia wood (continuation).

| Sample<br>(-) | Time<br>(s) | $c$ Predicted<br>(kJ mol <sup>-1</sup> K <sup>-1</sup> ) | $n$ Predicted<br>(mol s <sup>-1</sup> ) | $c$ True<br>(kJ mol <sup>-1</sup> K <sup>-1</sup> ) | $n$ True<br>(mol s <sup>-1</sup> ) |
|---------------|-------------|----------------------------------------------------------|-----------------------------------------|-----------------------------------------------------|------------------------------------|
| Iroko         | 205         | 0.04607                                                  | 0.83662                                 | 0.04969                                             | 0.80976                            |
| Iroko         | 210         | 0.04598                                                  | 0.83677                                 | 0.04906                                             | 0.80981                            |
| Iroko         | 215         | 0.04585                                                  | 0.83715                                 | 0.04994                                             | 0.81004                            |
| Iroko         | 220         | 0.04572                                                  | 0.83753                                 | 0.04807                                             | 0.81025                            |
| Iroko         | 225         | 0.04566                                                  | 0.83756                                 | 0.04791                                             | 0.81020                            |
| Iroko         | 230         | 0.04561                                                  | 0.83755                                 | 0.04850                                             | 0.81013                            |
| Iroko         | 235         | 0.04548                                                  | 0.83800                                 | 0.04840                                             | 0.81036                            |
| Iroko         | 240         | 0.04539                                                  | 0.83823                                 | 0.04799                                             | 0.81044                            |
| Iroko         | 245         | 0.04528                                                  | 0.83857                                 | 0.04860                                             | 0.81058                            |
| Iroko         | 250         | 0.04514                                                  | 0.83912                                 | 0.04810                                             | 0.81084                            |
| Iroko         | 255         | 0.04505                                                  | 0.83938                                 | 0.04826                                             | 0.81094                            |
| Iroko         | 260         | 0.04502                                                  | 0.83931                                 | 0.04837                                             | 0.81083                            |
| Iroko         | 265         | 0.04502                                                  | 0.83906                                 | 0.04843                                             | 0.81062                            |
| Iroko         | 270         | 0.04498                                                  | 0.83910                                 | 0.04818                                             | 0.81058                            |
| Iroko         | 275         | 0.04494                                                  | 0.83912                                 | 0.04822                                             | 0.81053                            |
| Iroko         | 280         | 0.04488                                                  | 0.83924                                 | 0.04727                                             | 0.81055                            |
| Iroko         | 285         | 0.04486                                                  | 0.83914                                 | 0.04751                                             | 0.81043                            |
| Iroko         | 290         | 0.04486                                                  | 0.83895                                 | 0.04760                                             | 0.81025                            |
| Iroko         | 295         | 0.04482                                                  | 0.83898                                 | 0.04743                                             | 0.81021                            |
| Iroko         | 300         | 0.04475                                                  | 0.83919                                 | 0.04775                                             | 0.81028                            |
| Iroko         | 305         | 0.04472                                                  | 0.83915                                 | 0.04724                                             | 0.81020                            |
| Iroko         | 310         | 0.04466                                                  | 0.83935                                 | 0.04715                                             | 0.81028                            |
| Iroko         | 315         | 0.04461                                                  | 0.83948                                 | 0.04796                                             | 0.81033                            |
| Iroko         | 320         | 0.04458                                                  | 0.83947                                 | 0.04699                                             | 0.81027                            |
| Iroko         | 325         | 0.04454                                                  | 0.83949                                 | 0.04693                                             | 0.81025                            |
| Iroko         | 330         | 0.04450                                                  | 0.83961                                 | 0.04716                                             | 0.81029                            |
| Iroko         | 335         | 0.04446                                                  | 0.83967                                 | 0.04695                                             | 0.81030                            |
| Iroko         | 340         | 0.04444                                                  | 0.83962                                 | 0.04619                                             | 0.81022                            |
| Iroko         | 345         | 0.04444                                                  | 0.83948                                 | 0.04609                                             | 0.81009                            |
| Iroko         | 350         | 0.04441                                                  | 0.83953                                 | 0.04601                                             | 0.81010                            |
| Iroko         | 355         | 0.04440                                                  | 0.83939                                 | 0.04765                                             | 0.80996                            |
| Iroko         | 360         | 0.04438                                                  | 0.83933                                 | 0.04630                                             | 0.80989                            |
| Iroko         | 365         | 0.04435                                                  | 0.83945                                 | 0.04594                                             | 0.80997                            |
| Iroko         | 370         | 0.04433                                                  | 0.83938                                 | 0.04658                                             | 0.80990                            |
| Iroko         | 375         | 0.04434                                                  | 0.83916                                 | 0.04700                                             | 0.80967                            |
| Iroko         | 380         | 0.04433                                                  | 0.83907                                 | 0.04698                                             | 0.80956                            |
| Iroko         | 385         | 0.04432                                                  | 0.83897                                 | 0.04776                                             | 0.80945                            |
| Iroko         | 390         | 0.04432                                                  | 0.83877                                 | 0.04751                                             | 0.80927                            |
| Iroko         | 395         | 0.04431                                                  | 0.83866                                 | 0.04623                                             | 0.80914                            |
| Iroko         | 400         | 0.04433                                                  | 0.83832                                 | 0.04676                                             | 0.80882                            |

**Table S3.** Predicted and true values of  $c$  and  $n$  for Iroko, Pine and Paulownia wood (continuation).

| Sample<br>(-) | Time<br>(s) | $c$ Predicted<br>(kJ mol <sup>-1</sup> K <sup>-1</sup> ) | $n$ Predicted<br>(mol s <sup>-1</sup> ) | $c$ True<br>(kJ mol <sup>-1</sup> K <sup>-1</sup> ) | $n$ True<br>(mol s <sup>-1</sup> ) |
|---------------|-------------|----------------------------------------------------------|-----------------------------------------|-----------------------------------------------------|------------------------------------|
| Iroko         | 405         | 0.04431                                                  | 0.83832                                 | 0.04789                                             | 0.80879                            |
| Iroko         | 410         | 0.04430                                                  | 0.83821                                 | 0.04830                                             | 0.80867                            |
| Iroko         | 415         | 0.04431                                                  | 0.83801                                 | 0.04842                                             | 0.80846                            |
| Iroko         | 420         | 0.04435                                                  | 0.83752                                 | 0.04829                                             | 0.80801                            |
| Iroko         | 425         | 0.04437                                                  | 0.83722                                 | 0.04809                                             | 0.80773                            |
| Iroko         | 430         | 0.04439                                                  | 0.83696                                 | 0.04811                                             | 0.80747                            |
| Iroko         | 435         | 0.04442                                                  | 0.83663                                 | 0.04831                                             | 0.80716                            |
| Iroko         | 440         | 0.04443                                                  | 0.83639                                 | 0.04935                                             | 0.80694                            |
| Iroko         | 445         | 0.04448                                                  | 0.83592                                 | 0.04918                                             | 0.80656                            |
| Iroko         | 450         | 0.04450                                                  | 0.83562                                 | 0.04882                                             | 0.80629                            |
| Iroko         | 455         | 0.04452                                                  | 0.83540                                 | 0.04864                                             | 0.80608                            |
| Iroko         | 460         | 0.04460                                                  | 0.83474                                 | 0.04970                                             | 0.80556                            |
| Iroko         | 465         | 0.04467                                                  | 0.83419                                 | 0.05022                                             | 0.80515                            |
| Iroko         | 470         | 0.04475                                                  | 0.83351                                 | 0.04947                                             | 0.80468                            |
| Iroko         | 475         | 0.04486                                                  | 0.83266                                 | 0.05014                                             | 0.80410                            |
| Iroko         | 480         | 0.04489                                                  | 0.83223                                 | 0.05050                                             | 0.80379                            |
| Iroko         | 485         | 0.04491                                                  | 0.83184                                 | 0.04947                                             | 0.80353                            |
| Iroko         | 490         | 0.04499                                                  | 0.83097                                 | 0.04955                                             | 0.80300                            |
| Iroko         | 495         | 0.04507                                                  | 0.83001                                 | 0.05028                                             | 0.80245                            |
| Iroko         | 500         | 0.04511                                                  | 0.82912                                 | 0.05078                                             | 0.80195                            |
| Iroko         | 505         | 0.04512                                                  | 0.82839                                 | 0.05040                                             | 0.80160                            |
| Iroko         | 510         | 0.04511                                                  | 0.82756                                 | 0.05143                                             | 0.80121                            |
| Iroko         | 515         | 0.04509                                                  | 0.82619                                 | 0.04921                                             | 0.80063                            |
| Iroko         | 520         | 0.04503                                                  | 0.82452                                 | 0.05102                                             | 0.79999                            |
| Iroko         | 525         | 0.04494                                                  | 0.82332                                 | 0.05150                                             | 0.79959                            |
| Iroko         | 530         | 0.04478                                                  | 0.82121                                 | 0.05100                                             | 0.79890                            |
| Iroko         | 535         | 0.04453                                                  | 0.81836                                 | 0.05178                                             | 0.79798                            |
| Iroko         | 540         | 0.04430                                                  | 0.81610                                 | 0.05120                                             | 0.79722                            |
| Iroko         | 545         | 0.04411                                                  | 0.81414                                 | 0.05197                                             | 0.79649                            |
| Iroko         | 550         | 0.04396                                                  | 0.81251                                 | 0.05145                                             | 0.79575                            |
| Iroko         | 555         | 0.04387                                                  | 0.81122                                 | 0.05222                                             | 0.79503                            |
| Iroko         | 560         | 0.04382                                                  | 0.81008                                 | 0.05097                                             | 0.79424                            |
| Iroko         | 565         | 0.04381                                                  | 0.80921                                 | 0.05200                                             | 0.79352                            |
| Iroko         | 570         | 0.04385                                                  | 0.80819                                 | 0.05247                                             | 0.79248                            |
| Iroko         | 575         | 0.04391                                                  | 0.80739                                 | 0.05260                                             | 0.79165                            |
| Iroko         | 580         | 0.04403                                                  | 0.80642                                 | 0.05253                                             | 0.79060                            |
| Iroko         | 585         | 0.04419                                                  | 0.80536                                 | 0.05220                                             | 0.78954                            |
| Iroko         | 590         | 0.04435                                                  | 0.80432                                 | 0.05122                                             | 0.78861                            |
| Iroko         | 595         | 0.04454                                                  | 0.80318                                 | 0.05218                                             | 0.78766                            |
| Iroko         | 600         | 0.04483                                                  | 0.80154                                 | 0.05184                                             | 0.78641                            |

**Table S3.** Predicted and true values of  $c$  and  $n$  for Iroko, Pine and Paulownia wood (continuation).

| Sample<br>(-) | Time<br>(s) | $c$ Predicted<br>(kJ mol <sup>-1</sup> K <sup>-1</sup> ) | $n$ Predicted<br>(mol s <sup>-1</sup> ) | $c$ True<br>(kJ mol <sup>-1</sup> K <sup>-1</sup> ) | $n$ True<br>(mol s <sup>-1</sup> ) |
|---------------|-------------|----------------------------------------------------------|-----------------------------------------|-----------------------------------------------------|------------------------------------|
| Iroko         | 605         | 0.04500                                                  | 0.80053                                 | 0.05293                                             | 0.78571                            |
| Iroko         | 610         | 0.04525                                                  | 0.79917                                 | 0.05247                                             | 0.78480                            |
| Iroko         | 615         | 0.04549                                                  | 0.79778                                 | 0.05341                                             | 0.78391                            |
| Iroko         | 620         | 0.04581                                                  | 0.79605                                 | 0.05416                                             | 0.78286                            |
| Iroko         | 625         | 0.04614                                                  | 0.79422                                 | 0.05404                                             | 0.78178                            |
| Iroko         | 630         | 0.04665                                                  | 0.79156                                 | 0.05598                                             | 0.78026                            |
| Iroko         | 635         | 0.04709                                                  | 0.78921                                 | 0.05540                                             | 0.77891                            |
| Iroko         | 640         | 0.04753                                                  | 0.78690                                 | 0.05512                                             | 0.77755                            |
| Iroko         | 645         | 0.04793                                                  | 0.78486                                 | 0.05497                                             | 0.77628                            |
| Iroko         | 650         | 0.04817                                                  | 0.78359                                 | 0.05442                                             | 0.77544                            |
| Iroko         | 655         | 0.04848                                                  | 0.78200                                 | 0.05562                                             | 0.77435                            |
| Iroko         | 660         | 0.04880                                                  | 0.78039                                 | 0.05621                                             | 0.77314                            |
| Iroko         | 665         | 0.04914                                                  | 0.77877                                 | 0.05605                                             | 0.77175                            |
| Iroko         | 670         | 0.04940                                                  | 0.77754                                 | 0.05599                                             | 0.77053                            |
| Iroko         | 675         | 0.04968                                                  | 0.77630                                 | 0.05538                                             | 0.76902                            |
| Iroko         | 680         | 0.04986                                                  | 0.77548                                 | 0.05666                                             | 0.76772                            |
| Iroko         | 685         | 0.05001                                                  | 0.77479                                 | 0.05634                                             | 0.76627                            |
| Iroko         | 690         | 0.05008                                                  | 0.77429                                 | 0.05805                                             | 0.76479                            |
| Iroko         | 695         | 0.05006                                                  | 0.77380                                 | 0.05693                                             | 0.76299                            |
| Iroko         | 700         | 0.04991                                                  | 0.77325                                 | 0.05798                                             | 0.76136                            |
| Iroko         | 705         | 0.04961                                                  | 0.77237                                 | 0.05795                                             | 0.75984                            |
| Iroko         | 710         | 0.04915                                                  | 0.77085                                 | 0.05799                                             | 0.75830                            |
| Iroko         | 715         | 0.04858                                                  | 0.76886                                 | 0.05797                                             | 0.75694                            |
| Iroko         | 720         | 0.04806                                                  | 0.76732                                 | 0.05675                                             | 0.75604                            |
| Iroko         | 725         | 0.04754                                                  | 0.76596                                 | 0.05595                                             | 0.75529                            |
| Iroko         | 730         | 0.04695                                                  | 0.76444                                 | 0.05684                                             | 0.75452                            |
| Iroko         | 735         | 0.04630                                                  | 0.76284                                 | 0.05763                                             | 0.75373                            |
| Iroko         | 740         | 0.04540                                                  | 0.76028                                 | 0.05871                                             | 0.75262                            |
| Iroko         | 745         | 0.04458                                                  | 0.75838                                 | 0.05872                                             | 0.75168                            |
| Iroko         | 750         | 0.04367                                                  | 0.75641                                 | 0.05855                                             | 0.75051                            |
| Iroko         | 755         | 0.04302                                                  | 0.75566                                 | 0.05807                                             | 0.74975                            |
| Iroko         | 760         | 0.04245                                                  | 0.75528                                 | 0.05962                                             | 0.74910                            |
| Iroko         | 765         | 0.04191                                                  | 0.75497                                 | 0.05830                                             | 0.74829                            |
| Iroko         | 770         | 0.04150                                                  | 0.75518                                 | 0.05739                                             | 0.74822                            |
| Iroko         | 775         | 0.04125                                                  | 0.75614                                 | 0.05473                                             | 0.74886                            |
| Iroko         | 780         | 0.04145                                                  | 0.75897                                 | 0.05213                                             | 0.75006                            |
| Iroko         | 785         | 0.04269                                                  | 0.76537                                 | 0.05031                                             | 0.75205                            |
| Iroko         | 790         | 0.04499                                                  | 0.77266                                 | 0.04742                                             | 0.75487                            |
| Iroko         | 795         | 0.04743                                                  | 0.77516                                 | 0.04373                                             | 0.75854                            |
| Iroko         | 800         | 0.04878                                                  | 0.77461                                 | 0.03971                                             | 0.76259                            |

**Table S3.** Predicted and true values of  $c$  and  $n$  for Iroko, Pine and Paulownia wood (continuation).

| Sample<br>(-) | Time<br>(s) | $c$ Predicted<br>(kJ mol <sup>-1</sup> K <sup>-1</sup> ) | $n$ Predicted<br>(mol s <sup>-1</sup> ) | $c$ True<br>(kJ mol <sup>-1</sup> K <sup>-1</sup> ) | $n$ True<br>(mol s <sup>-1</sup> ) |
|---------------|-------------|----------------------------------------------------------|-----------------------------------------|-----------------------------------------------------|------------------------------------|
| Iroko         | 805         | 0.04896                                                  | 0.77571                                 | 0.03776                                             | 0.76682                            |
| Iroko         | 810         | 0.04830                                                  | 0.77936                                 | 0.03636                                             | 0.77078                            |
| Iroko         | 815         | 0.04727                                                  | 0.78432                                 | 0.03618                                             | 0.77427                            |
| Iroko         | 820         | 0.04627                                                  | 0.78896                                 | 0.03617                                             | 0.77713                            |
| Iroko         | 825         | 0.04528                                                  | 0.79353                                 | 0.03702                                             | 0.78017                            |
| Iroko         | 830         | 0.04468                                                  | 0.79637                                 | 0.03618                                             | 0.78273                            |
| Iroko         | 835         | 0.04438                                                  | 0.79799                                 | 0.03620                                             | 0.78513                            |
| Iroko         | 840         | 0.04419                                                  | 0.79921                                 | 0.03446                                             | 0.78747                            |
| Iroko         | 845         | 0.04378                                                  | 0.80148                                 | 0.03465                                             | 0.78977                            |
| Iroko         | 850         | 0.04307                                                  | 0.80491                                 | 0.03486                                             | 0.79168                            |
| Iroko         | 855         | 0.04218                                                  | 0.80907                                 | 0.03445                                             | 0.79347                            |
| Iroko         | 860         | 0.04131                                                  | 0.81298                                 | 0.03448                                             | 0.79526                            |
| Iroko         | 865         | 0.04067                                                  | 0.81589                                 | 0.03473                                             | 0.79702                            |
| Iroko         | 870         | 0.04030                                                  | 0.81765                                 | 0.03557                                             | 0.79855                            |
| Iroko         | 875         | 0.04011                                                  | 0.81907                                 | 0.03548                                             | 0.80005                            |
| Iroko         | 880         | 0.04007                                                  | 0.82036                                 | 0.03507                                             | 0.80131                            |
| Iroko         | 885         | 0.04016                                                  | 0.82224                                 | 0.03584                                             | 0.80264                            |
| Iroko         | 890         | 0.04047                                                  | 0.82521                                 | 0.03681                                             | 0.80405                            |
| Iroko         | 895         | 0.04092                                                  | 0.82879                                 | 0.03647                                             | 0.80530                            |
| Iroko         | 900         | 0.04147                                                  | 0.83291                                 | 0.03583                                             | 0.80648                            |
| Iroko         | 905         | 0.04198                                                  | 0.83681                                 | 0.03629                                             | 0.80753                            |
| Iroko         | 910         | 0.04233                                                  | 0.83966                                 | 0.03647                                             | 0.80834                            |
| Iroko         | 915         | 0.04263                                                  | 0.84231                                 | 0.03658                                             | 0.80918                            |
| Iroko         | 920         | 0.04285                                                  | 0.84456                                 | 0.03642                                             | 0.81001                            |
| Iroko         | 925         | 0.04296                                                  | 0.84623                                 | 0.03637                                             | 0.81079                            |
| Iroko         | 930         | 0.04302                                                  | 0.84780                                 | 0.03795                                             | 0.81181                            |
| Iroko         | 935         | 0.04298                                                  | 0.84867                                 | 0.03677                                             | 0.81266                            |
| Iroko         | 940         | 0.04286                                                  | 0.84921                                 | 0.03807                                             | 0.81357                            |
| Iroko         | 945         | 0.04272                                                  | 0.84935                                 | 0.03741                                             | 0.81419                            |
| Iroko         | 950         | 0.04255                                                  | 0.84937                                 | 0.03743                                             | 0.81485                            |
| Iroko         | 955         | 0.04240                                                  | 0.84928                                 | 0.03741                                             | 0.81530                            |
| Iroko         | 960         | 0.04224                                                  | 0.84915                                 | 0.03774                                             | 0.81572                            |
| Iroko         | 965         | 0.04205                                                  | 0.84897                                 | 0.03826                                             | 0.81635                            |
| Iroko         | 970         | 0.04190                                                  | 0.84878                                 | 0.03749                                             | 0.81672                            |
| Iroko         | 975         | 0.04171                                                  | 0.84854                                 | 0.03795                                             | 0.81735                            |
| Iroko         | 980         | 0.04154                                                  | 0.84829                                 | 0.03895                                             | 0.81787                            |
| Iroko         | 985         | 0.04138                                                  | 0.84804                                 | 0.03843                                             | 0.81838                            |
| Iroko         | 990         | 0.04122                                                  | 0.84779                                 | 0.03772                                             | 0.81886                            |
| Iroko         | 995         | 0.04107                                                  | 0.84753                                 | 0.03844                                             | 0.81938                            |
| Iroko         | 1000        | 0.04095                                                  | 0.84733                                 | 0.03947                                             | 0.81972                            |

**Table S3.** Predicted and true values of  $c$  and  $n$  for Iroko, Pine and Paulownia wood (continuation).

| Sample<br>(-) | Time<br>(s) | $c$ Predicted<br>(kJ mol <sup>-1</sup> K <sup>-1</sup> ) | $n$ Predicted<br>(mol s <sup>-1</sup> ) | $c$ True<br>(kJ mol <sup>-1</sup> K <sup>-1</sup> ) | $n$ True<br>(mol s <sup>-1</sup> ) |
|---------------|-------------|----------------------------------------------------------|-----------------------------------------|-----------------------------------------------------|------------------------------------|
| Iroko         | 1005        | 0.04083                                                  | 0.84711                                 | 0.03991                                             | 0.82011                            |
| Iroko         | 1010        | 0.04073                                                  | 0.84694                                 | 0.04051                                             | 0.82038                            |
| Iroko         | 1015        | 0.04065                                                  | 0.84679                                 | 0.04088                                             | 0.82058                            |
| Iroko         | 1020        | 0.04055                                                  | 0.84660                                 | 0.04003                                             | 0.82099                            |
| Iroko         | 1025        | 0.04046                                                  | 0.84642                                 | 0.04051                                             | 0.82138                            |
| Iroko         | 1030        | 0.04036                                                  | 0.84622                                 | 0.04070                                             | 0.82184                            |
| Iroko         | 1035        | 0.04027                                                  | 0.84602                                 | 0.04039                                             | 0.82238                            |
| Iroko         | 1040        | 0.04020                                                  | 0.84586                                 | 0.04023                                             | 0.82275                            |
| Iroko         | 1045        | 0.04015                                                  | 0.84574                                 | 0.04139                                             | 0.82304                            |
| Iroko         | 1050        | 0.04010                                                  | 0.84563                                 | 0.04165                                             | 0.82332                            |
| Iroko         | 1055        | 0.04006                                                  | 0.84551                                 | 0.04150                                             | 0.82364                            |
| Iroko         | 1060        | 0.04001                                                  | 0.84539                                 | 0.04228                                             | 0.82400                            |
| Iroko         | 1065        | 0.03999                                                  | 0.84533                                 | 0.04207                                             | 0.82414                            |
| Iroko         | 1070        | 0.03996                                                  | 0.84524                                 | 0.04247                                             | 0.82438                            |
| Iroko         | 1075        | 0.03993                                                  | 0.84515                                 | 0.04291                                             | 0.82469                            |
| Iroko         | 1080        | 0.03991                                                  | 0.84505                                 | 0.04308                                             | 0.82506                            |
| Iroko         | 1085        | 0.03989                                                  | 0.84501                                 | 0.04288                                             | 0.82521                            |
| Iroko         | 1090        | 0.03989                                                  | 0.84497                                 | 0.04300                                             | 0.82538                            |
| Iroko         | 1095        | 0.03988                                                  | 0.84490                                 | 0.04252                                             | 0.82568                            |
| Iroko         | 1100        | 0.03987                                                  | 0.84481                                 | 0.04314                                             | 0.82605                            |
| Iroko         | 1105        | 0.03987                                                  | 0.84470                                 | 0.04281                                             | 0.82648                            |
| Iroko         | 1110        | 0.03987                                                  | 0.84470                                 | 0.04368                                             | 0.82658                            |
| Iroko         | 1115        | 0.03988                                                  | 0.84464                                 | 0.04337                                             | 0.82688                            |
| Iroko         | 1120        | 0.03989                                                  | 0.84464                                 | 0.04259                                             | 0.82703                            |
| Iroko         | 1125        | 0.03991                                                  | 0.84464                                 | 0.04277                                             | 0.82715                            |
| Iroko         | 1130        | 0.03993                                                  | 0.84465                                 | 0.04386                                             | 0.82729                            |
| Iroko         | 1135        | 0.03995                                                  | 0.84465                                 | 0.04328                                             | 0.82747                            |
| Iroko         | 1140        | 0.03997                                                  | 0.84464                                 | 0.04333                                             | 0.82767                            |
| Iroko         | 1145        | 0.04000                                                  | 0.84465                                 | 0.04406                                             | 0.82787                            |
| Iroko         | 1150        | 0.04003                                                  | 0.84469                                 | 0.04284                                             | 0.82796                            |
| Iroko         | 1155        | 0.04006                                                  | 0.84475                                 | 0.04301                                             | 0.82803                            |
| Iroko         | 1160        | 0.04010                                                  | 0.84473                                 | 0.04370                                             | 0.82834                            |
| Iroko         | 1165        | 0.04014                                                  | 0.84475                                 | 0.04319                                             | 0.82853                            |
| Iroko         | 1170        | 0.04019                                                  | 0.84471                                 | 0.04476                                             | 0.82891                            |
| Iroko         | 1175        | 0.04024                                                  | 0.84469                                 | 0.04566                                             | 0.82928                            |
| Iroko         | 1180        | 0.04029                                                  | 0.84475                                 | 0.04645                                             | 0.82943                            |
| Iroko         | 1185        | 0.04034                                                  | 0.84487                                 | 0.04645                                             | 0.82938                            |
| Iroko         | 1190        | 0.04040                                                  | 0.84489                                 | 0.04596                                             | 0.82968                            |
| Iroko         | 1195        | 0.04047                                                  | 0.84492                                 | 0.04513                                             | 0.83003                            |
| Iroko         | 1200        | 0.04053                                                  | 0.84500                                 | 0.04518                                             | 0.83014                            |

**Table S3.** Predicted and true values of  $c$  and  $n$  for Iroko, Pine and Paulownia wood (continuation).

| Sample<br>(-) | Time<br>(s) | $c$ Predicted<br>(kJ mol <sup>-1</sup> K <sup>-1</sup> ) | $n$ Predicted<br>(mol s <sup>-1</sup> ) | $c$ True<br>(kJ mol <sup>-1</sup> K <sup>-1</sup> ) | $n$ True<br>(mol s <sup>-1</sup> ) |
|---------------|-------------|----------------------------------------------------------|-----------------------------------------|-----------------------------------------------------|------------------------------------|
| Iroko         | 1205        | 0.04060                                                  | 0.84510                                 | 0.04565                                             | 0.83026                            |
| Iroko         | 1210        | 0.04066                                                  | 0.84521                                 | 0.04697                                             | 0.83034                            |
| Iroko         | 1215        | 0.04075                                                  | 0.84527                                 | 0.04709                                             | 0.83070                            |
| Iroko         | 1220        | 0.04082                                                  | 0.84540                                 | 0.04837                                             | 0.83070                            |
| Iroko         | 1225        | 0.04089                                                  | 0.84553                                 | 0.04607                                             | 0.83074                            |
| Iroko         | 1230        | 0.04096                                                  | 0.84568                                 | 0.04517                                             | 0.83068                            |
| Iroko         | 1235        | 0.04104                                                  | 0.84578                                 | 0.04397                                             | 0.83087                            |
| Iroko         | 1240        | 0.04112                                                  | 0.84592                                 | 0.04440                                             | 0.83094                            |
| Iroko         | 1245        | 0.04121                                                  | 0.84604                                 | 0.04562                                             | 0.83107                            |
| Iroko         | 1250        | 0.04130                                                  | 0.84618                                 | 0.04568                                             | 0.83113                            |
| Iroko         | 1255        | 0.04140                                                  | 0.84629                                 | 0.04713                                             | 0.83134                            |
| Iroko         | 1260        | 0.04150                                                  | 0.84642                                 | 0.04837                                             | 0.83159                            |
| Iroko         | 1265        | 0.04161                                                  | 0.84655                                 | 0.04720                                             | 0.83176                            |
| Iroko         | 1270        | 0.04169                                                  | 0.84668                                 | 0.04688                                             | 0.83172                            |
| Iroko         | 1275        | 0.04178                                                  | 0.84681                                 | 0.04600                                             | 0.83183                            |
| Iroko         | 1280        | 0.04190                                                  | 0.84695                                 | 0.04626                                             | 0.83207                            |
| Iroko         | 1285        | 0.04201                                                  | 0.84709                                 | 0.04657                                             | 0.83223                            |
| Iroko         | 1290        | 0.04210                                                  | 0.84720                                 | 0.04851                                             | 0.83224                            |
| Iroko         | 1295        | 0.04221                                                  | 0.84733                                 | 0.04897                                             | 0.83240                            |
| Iroko         | 1300        | 0.04231                                                  | 0.84744                                 | 0.04829                                             | 0.83249                            |
| Iroko         | 1305        | 0.04239                                                  | 0.84750                                 | 0.04816                                             | 0.83245                            |
| Iroko         | 1310        | 0.04247                                                  | 0.84757                                 | 0.04638                                             | 0.83243                            |
| Iroko         | 1315        | 0.04257                                                  | 0.84766                                 | 0.04759                                             | 0.83253                            |
| Iroko         | 1320        | 0.04266                                                  | 0.84771                                 | 0.04874                                             | 0.83255                            |
| Iroko         | 1325        | 0.04274                                                  | 0.84776                                 | 0.05012                                             | 0.83258                            |
| Iroko         | 1330        | 0.04283                                                  | 0.84780                                 | 0.04940                                             | 0.83261                            |
| Iroko         | 1335        | 0.04292                                                  | 0.84783                                 | 0.04912                                             | 0.83268                            |
| Iroko         | 1340        | 0.04304                                                  | 0.84788                                 | 0.04891                                             | 0.83286                            |
| Iroko         | 1345        | 0.04317                                                  | 0.84795                                 | 0.04866                                             | 0.83307                            |
| Iroko         | 1350        | 0.04324                                                  | 0.84793                                 | 0.04990                                             | 0.83306                            |
| Iroko         | 1355        | 0.04332                                                  | 0.84790                                 | 0.04957                                             | 0.83310                            |
| Iroko         | 1360        | 0.04344                                                  | 0.84793                                 | 0.05028                                             | 0.83326                            |
| Iroko         | 1365        | 0.04353                                                  | 0.84791                                 | 0.04935                                             | 0.83335                            |
| Iroko         | 1370        | 0.04362                                                  | 0.84787                                 | 0.04942                                             | 0.83341                            |
| Iroko         | 1375        | 0.04374                                                  | 0.84790                                 | 0.05036                                             | 0.83358                            |
| Iroko         | 1380        | 0.04383                                                  | 0.84785                                 | 0.05028                                             | 0.83365                            |
| Iroko         | 1385        | 0.04398                                                  | 0.84793                                 | 0.05179                                             | 0.83388                            |
| Iroko         | 1390        | 0.04403                                                  | 0.84775                                 | 0.05120                                             | 0.83383                            |
| Iroko         | 1395        | 0.04416                                                  | 0.84778                                 | 0.05107                                             | 0.83400                            |
| Iroko         | 1400        | 0.04421                                                  | 0.84761                                 | 0.05121                                             | 0.83398                            |

**Table S3.** Predicted and true values of  $c$  and  $n$  for Iroko, Pine and Paulownia wood (continuation).

| Sample<br>(-) | Time<br>(s) | $c$ Predicted<br>(kJ mol <sup>-1</sup> K <sup>-1</sup> ) | $n$ Predicted<br>(mol s <sup>-1</sup> ) | $c$ True<br>(kJ mol <sup>-1</sup> K <sup>-1</sup> ) | $n$ True<br>(mol s <sup>-1</sup> ) |
|---------------|-------------|----------------------------------------------------------|-----------------------------------------|-----------------------------------------------------|------------------------------------|
| Iroko         | 1405        | 0.04431                                                  | 0.84754                                 | 0.05012                                             | 0.83407                            |
| Iroko         | 1410        | 0.04441                                                  | 0.84747                                 | 0.05055                                             | 0.83416                            |
| Iroko         | 1415        | 0.04448                                                  | 0.84731                                 | 0.05171                                             | 0.83418                            |
| Iroko         | 1420        | 0.04462                                                  | 0.84735                                 | 0.05231                                             | 0.83436                            |
| Iroko         | 1425        | 0.04462                                                  | 0.84700                                 | 0.05267                                             | 0.83425                            |
| Iroko         | 1430        | 0.04466                                                  | 0.84676                                 | 0.05254                                             | 0.83422                            |
| Iroko         | 1435        | 0.04460                                                  | 0.84639                                 | 0.04938                                             | 0.83399                            |
| Iroko         | 1440        | 0.04464                                                  | 0.84618                                 | 0.04842                                             | 0.83397                            |
| Iroko         | 1445        | 0.04471                                                  | 0.84602                                 | 0.04951                                             | 0.83403                            |
| Iroko         | 1450        | 0.04479                                                  | 0.84586                                 | 0.04720                                             | 0.83409                            |
| Iroko         | 1455        | 0.04497                                                  | 0.84584                                 | 0.05005                                             | 0.83436                            |
| Iroko         | 1460        | 0.04496                                                  | 0.84555                                 | 0.04999                                             | 0.83424                            |
| Iroko         | 1465        | 0.04509                                                  | 0.84546                                 | 0.05058                                             | 0.83440                            |
| Iroko         | 1470        | 0.04518                                                  | 0.84530                                 | 0.05137                                             | 0.83448                            |
| Iroko         | 1475        | 0.04529                                                  | 0.84518                                 | 0.05293                                             | 0.83458                            |
| Iroko         | 1480        | 0.04537                                                  | 0.84501                                 | 0.05092                                             | 0.83463                            |
| Iroko         | 1485        | 0.04551                                                  | 0.84495                                 | 0.04901                                             | 0.83478                            |
| Iroko         | 1490        | 0.04567                                                  | 0.84498                                 | 0.05007                                             | 0.83497                            |
| Iroko         | 1495        | 0.04579                                                  | 0.84490                                 | 0.05202                                             | 0.83508                            |
| Iroko         | 1500        | 0.04573                                                  | 0.84444                                 | 0.05132                                             | 0.83492                            |
| Iroko         | 1505        | 0.04573                                                  | 0.84414                                 | 0.04999                                             | 0.83486                            |
| Iroko         | 1510        | 0.04571                                                  | 0.84384                                 | 0.05040                                             | 0.83476                            |
| Iroko         | 1515        | 0.04570                                                  | 0.84359                                 | 0.05089                                             | 0.83470                            |
| Iroko         | 1520        | 0.04567                                                  | 0.84336                                 | 0.05020                                             | 0.83459                            |
| Iroko         | 1525        | 0.04580                                                  | 0.84323                                 | 0.05191                                             | 0.83473                            |
| Iroko         | 1530        | 0.04588                                                  | 0.84309                                 | 0.05129                                             | 0.83479                            |
| Iroko         | 1535        | 0.04599                                                  | 0.84297                                 | 0.05148                                             | 0.83488                            |
| Iroko         | 1540        | 0.04603                                                  | 0.84280                                 | 0.05011                                             | 0.83489                            |
| Iroko         | 1545        | 0.04603                                                  | 0.84260                                 | 0.05182                                             | 0.83483                            |
| Iroko         | 1550        | 0.04612                                                  | 0.84248                                 | 0.05263                                             | 0.83490                            |
| Iroko         | 1555        | 0.04625                                                  | 0.84239                                 | 0.05266                                             | 0.83503                            |
| Iroko         | 1560        | 0.04622                                                  | 0.84220                                 | 0.05100                                             | 0.83495                            |
| Iroko         | 1565        | 0.04632                                                  | 0.84209                                 | 0.05097                                             | 0.83502                            |
| Iroko         | 1570        | 0.04636                                                  | 0.84196                                 | 0.05137                                             | 0.83503                            |
| Iroko         | 1575        | 0.04649                                                  | 0.84189                                 | 0.05282                                             | 0.83514                            |
| Iroko         | 1580        | 0.04658                                                  | 0.84180                                 | 0.05255                                             | 0.83521                            |
| Iroko         | 1585        | 0.04681                                                  | 0.84190                                 | 0.05500                                             | 0.83544                            |
| Iroko         | 1590        | 0.04693                                                  | 0.84187                                 | 0.05584                                             | 0.83552                            |
| Iroko         | 1595        | 0.04702                                                  | 0.84183                                 | 0.05400                                             | 0.83558                            |
| Iroko         | 1600        | 0.04715                                                  | 0.84185                                 | 0.05130                                             | 0.83568                            |



**Table S3.** Predicted and true values of  $c$  and  $n$  for Iroko, Pine and Paulownia wood (continuation).

| Sample<br>(-) | Time<br>(s) | $c$ Predicted<br>(kJ mol <sup>-1</sup> K <sup>-1</sup> ) | $n$ Predicted<br>(mol s <sup>-1</sup> ) | $c$ True<br>(kJ mol <sup>-1</sup> K <sup>-1</sup> ) | $n$ True<br>(mol s <sup>-1</sup> ) |
|---------------|-------------|----------------------------------------------------------|-----------------------------------------|-----------------------------------------------------|------------------------------------|
| Iroko         | 1605        | 0.04720                                                  | 0.84176                                 | 0.05238                                             | 0.83570                            |
| Iroko         | 1610        | 0.04718                                                  | 0.84154                                 | 0.05111                                             | 0.83563                            |
| Iroko         | 1615        | 0.04732                                                  | 0.84160                                 | 0.05258                                             | 0.83574                            |
| Iroko         | 1620        | 0.04733                                                  | 0.84145                                 | 0.05179                                             | 0.83571                            |
| Iroko         | 1625        | 0.04720                                                  | 0.84115                                 | 0.05048                                             | 0.83555                            |
| Iroko         | 1630        | 0.04724                                                  | 0.84108                                 | 0.05215                                             | 0.83555                            |
| Iroko         | 1635        | 0.04728                                                  | 0.84100                                 | 0.05368                                             | 0.83555                            |
| Iroko         | 1640        | 0.04758                                                  | 0.84125                                 | 0.05379                                             | 0.83582                            |
| Iroko         | 1645        | 0.04766                                                  | 0.84122                                 | 0.05449                                             | 0.83585                            |
| Iroko         | 1650        | 0.04766                                                  | 0.84110                                 | 0.05270                                             | 0.83581                            |
| Iroko         | 1655        | 0.04763                                                  | 0.84094                                 | 0.05465                                             | 0.83576                            |
| Iroko         | 1660        | 0.04764                                                  | 0.84084                                 | 0.05484                                             | 0.83573                            |
| Iroko         | 1665        | 0.04772                                                  | 0.84083                                 | 0.05465                                             | 0.83577                            |
| Iroko         | 1670        | 0.04771                                                  | 0.84072                                 | 0.05147                                             | 0.83574                            |
| Iroko         | 1675        | 0.04766                                                  | 0.84060                                 | 0.05091                                             | 0.83564                            |
| Iroko         | 1680        | 0.04782                                                  | 0.84063                                 | 0.05126                                             | 0.83577                            |
| Iroko         | 1685        | 0.04781                                                  | 0.84054                                 | 0.05332                                             | 0.83572                            |
| Iroko         | 1690        | 0.04771                                                  | 0.84041                                 | 0.05105                                             | 0.83560                            |
| Iroko         | 1695        | 0.04793                                                  | 0.84043                                 | 0.05190                                             | 0.83576                            |
| Iroko         | 1700        | 0.04788                                                  | 0.84032                                 | 0.04976                                             | 0.83567                            |
| Iroko         | 1705        | 0.04790                                                  | 0.84025                                 | 0.04824                                             | 0.83567                            |
| Iroko         | 1710        | 0.04817                                                  | 0.84030                                 | 0.04752                                             | 0.83588                            |
| Iroko         | 1715        | 0.04836                                                  | 0.84034                                 | 0.05038                                             | 0.83602                            |
| Iroko         | 1720        | 0.04834                                                  | 0.84017                                 | 0.05128                                             | 0.83596                            |
| Iroko         | 1725        | 0.04850                                                  | 0.84018                                 | 0.05410                                             | 0.83607                            |
| Iroko         | 1730        | 0.04846                                                  | 0.83997                                 | 0.05329                                             | 0.83599                            |
| Iroko         | 1735        | 0.04869                                                  | 0.84004                                 | 0.05337                                             | 0.83617                            |
| Iroko         | 1740        | 0.04887                                                  | 0.84009                                 | 0.05344                                             | 0.83628                            |
| Iroko         | 1745        | 0.04885                                                  | 0.83982                                 | 0.05267                                             | 0.83623                            |
| Iroko         | 1750        | 0.04890                                                  | 0.83965                                 | 0.05240                                             | 0.83623                            |
| Iroko         | 1755        | 0.04924                                                  | 0.83995                                 | 0.05359                                             | 0.83647                            |
| Iroko         | 1760        | 0.04933                                                  | 0.83982                                 | 0.05478                                             | 0.83651                            |
| Iroko         | 1765        | 0.04943                                                  | 0.83971                                 | 0.05460                                             | 0.83656                            |
| Iroko         | 1770        | 0.04902                                                  | 0.83871                                 | 0.05282                                             | 0.83618                            |
| Iroko         | 1775        | 0.04918                                                  | 0.83858                                 | 0.05208                                             | 0.83627                            |
| Iroko         | 1780        | 0.04930                                                  | 0.83841                                 | 0.04999                                             | 0.83633                            |
| Iroko         | 1785        | 0.04948                                                  | 0.83831                                 | 0.05096                                             | 0.83644                            |
| Iroko         | 1790        | 0.04935                                                  | 0.83772                                 | 0.05271                                             | 0.83630                            |
| Iroko         | 1795        | 0.04939                                                  | 0.83737                                 | 0.05294                                             | 0.83629                            |
| Iroko         | 1800        | 0.04935                                                  | 0.83691                                 | 0.05314                                             | 0.83621                            |

**Table S3.** Predicted and true values of  $c$  and  $n$  for Iroko, Pine and Paulownia wood (continuation).

| Sample<br>(-) | Time<br>(s) | $c$ Predicted<br>(kJ mol <sup>-1</sup> K <sup>-1</sup> ) | $n$ Predicted<br>(mol s <sup>-1</sup> ) | $c$ True<br>(kJ mol <sup>-1</sup> K <sup>-1</sup> ) | $n$ True<br>(mol s <sup>-1</sup> ) |
|---------------|-------------|----------------------------------------------------------|-----------------------------------------|-----------------------------------------------------|------------------------------------|
| Pine          | 0           | 0.24656                                                  | 0.85066                                 | 0.24520                                             | 0.86175                            |
| Pine          | 5           | 0.15979                                                  | 0.85066                                 | 0.17842                                             | 0.85161                            |
| Pine          | 10          | 0.11252                                                  | 0.84392                                 | 0.14313                                             | 0.84328                            |
| Pine          | 15          | 0.09142                                                  | 0.83384                                 | 0.11681                                             | 0.83644                            |
| Pine          | 20          | 0.08053                                                  | 0.83235                                 | 0.10317                                             | 0.83197                            |
| Pine          | 25          | 0.07405                                                  | 0.83221                                 | 0.09358                                             | 0.82922                            |
| Pine          | 30          | 0.06941                                                  | 0.83208                                 | 0.08535                                             | 0.82706                            |
| Pine          | 35          | 0.06596                                                  | 0.83194                                 | 0.08048                                             | 0.82553                            |
| Pine          | 40          | 0.06332                                                  | 0.83190                                 | 0.07424                                             | 0.82467                            |
| Pine          | 45          | 0.06124                                                  | 0.83205                                 | 0.07168                                             | 0.82454                            |
| Pine          | 50          | 0.05949                                                  | 0.83227                                 | 0.07074                                             | 0.82472                            |
| Pine          | 55          | 0.05790                                                  | 0.83238                                 | 0.06778                                             | 0.82461                            |
| Pine          | 60          | 0.05659                                                  | 0.83267                                 | 0.06685                                             | 0.82508                            |
| Pine          | 65          | 0.05539                                                  | 0.83283                                 | 0.06700                                             | 0.82526                            |
| Pine          | 70          | 0.05435                                                  | 0.83299                                 | 0.06336                                             | 0.82551                            |
| Pine          | 75          | 0.05344                                                  | 0.83316                                 | 0.06147                                             | 0.82583                            |
| Pine          | 80          | 0.05265                                                  | 0.83339                                 | 0.06031                                             | 0.82637                            |
| Pine          | 85          | 0.05198                                                  | 0.83375                                 | 0.06059                                             | 0.82742                            |
| Pine          | 90          | 0.05136                                                  | 0.83400                                 | 0.05981                                             | 0.82814                            |
| Pine          | 95          | 0.05080                                                  | 0.83416                                 | 0.05996                                             | 0.82862                            |
| Pine          | 100         | 0.05028                                                  | 0.83417                                 | 0.05925                                             | 0.82863                            |
| Pine          | 105         | 0.04983                                                  | 0.83434                                 | 0.05993                                             | 0.82910                            |
| Pine          | 110         | 0.04943                                                  | 0.83456                                 | 0.06004                                             | 0.82970                            |
| Pine          | 115         | 0.04907                                                  | 0.83468                                 | 0.06003                                             | 0.82997                            |
| Pine          | 120         | 0.04875                                                  | 0.83468                                 | 0.05867                                             | 0.82996                            |
| Pine          | 125         | 0.04846                                                  | 0.83478                                 | 0.05866                                             | 0.83017                            |
| Pine          | 130         | 0.04819                                                  | 0.83498                                 | 0.05823                                             | 0.83059                            |
| Pine          | 135         | 0.04792                                                  | 0.83532                                 | 0.06008                                             | 0.83117                            |
| Pine          | 140         | 0.04771                                                  | 0.83536                                 | 0.06002                                             | 0.83119                            |
| Pine          | 145         | 0.04755                                                  | 0.83524                                 | 0.06136                                             | 0.83099                            |
| Pine          | 150         | 0.04736                                                  | 0.83539                                 | 0.05913                                             | 0.83118                            |
| Pine          | 155         | 0.04719                                                  | 0.83556                                 | 0.05782                                             | 0.83138                            |
| Pine          | 160         | 0.04708                                                  | 0.83544                                 | 0.05600                                             | 0.83121                            |
| Pine          | 165         | 0.04691                                                  | 0.83571                                 | 0.05491                                             | 0.83149                            |
| Pine          | 170         | 0.04673                                                  | 0.83610                                 | 0.05518                                             | 0.83189                            |
| Pine          | 175         | 0.04663                                                  | 0.83610                                 | 0.05558                                             | 0.83185                            |
| Pine          | 180         | 0.04651                                                  | 0.83624                                 | 0.05623                                             | 0.83194                            |
| Pine          | 185         | 0.04642                                                  | 0.83630                                 | 0.05665                                             | 0.83191                            |
| Pine          | 190         | 0.04630                                                  | 0.83650                                 | 0.05663                                             | 0.83205                            |
| Pine          | 195         | 0.04628                                                  | 0.83619                                 | 0.05756                                             | 0.83171                            |
| Pine          | 200         | 0.04621                                                  | 0.83620                                 | 0.05672                                             | 0.83166                            |

**Table S3.** Predicted and true values of  $c$  and  $n$  for Iroko, Pine and Paulownia wood (continuation).

| Sample<br>(-) | Time<br>(s) | $c$ Predicted<br>(kJ mol <sup>-1</sup> K <sup>-1</sup> ) | $n$ Predicted<br>(mol s <sup>-1</sup> ) | $c$ True<br>(kJ mol <sup>-1</sup> K <sup>-1</sup> ) | $n$ True<br>(mol s <sup>-1</sup> ) |
|---------------|-------------|----------------------------------------------------------|-----------------------------------------|-----------------------------------------------------|------------------------------------|
| Pine          | 205         | 0.04616                                                  | 0.83615                                 | 0.05626                                             | 0.83156                            |
| Pine          | 210         | 0.04603                                                  | 0.83650                                 | 0.05623                                             | 0.83180                            |
| Pine          | 215         | 0.04599                                                  | 0.83639                                 | 0.05580                                             | 0.83167                            |
| Pine          | 220         | 0.04596                                                  | 0.83627                                 | 0.05713                                             | 0.83151                            |
| Pine          | 225         | 0.04605                                                  | 0.83556                                 | 0.05745                                             | 0.83085                            |
| Pine          | 230         | 0.04607                                                  | 0.83520                                 | 0.05810                                             | 0.83046                            |
| Pine          | 235         | 0.04599                                                  | 0.83533                                 | 0.05677                                             | 0.83053                            |
| Pine          | 240         | 0.04604                                                  | 0.83485                                 | 0.05660                                             | 0.83003                            |
| Pine          | 245         | 0.04610                                                  | 0.83433                                 | 0.05715                                             | 0.82946                            |
| Pine          | 250         | 0.04615                                                  | 0.83386                                 | 0.05809                                             | 0.82890                            |
| Pine          | 255         | 0.04626                                                  | 0.83309                                 | 0.05806                                             | 0.82790                            |
| Pine          | 260         | 0.04624                                                  | 0.83300                                 | 0.05926                                             | 0.82776                            |
| Pine          | 265         | 0.04628                                                  | 0.83256                                 | 0.05711                                             | 0.82714                            |
| Pine          | 270         | 0.04629                                                  | 0.83232                                 | 0.05831                                             | 0.82677                            |
| Pine          | 275         | 0.04637                                                  | 0.83175                                 | 0.05765                                             | 0.82577                            |
| Pine          | 280         | 0.04641                                                  | 0.83133                                 | 0.05597                                             | 0.82502                            |
| Pine          | 285         | 0.04644                                                  | 0.83099                                 | 0.05810                                             | 0.82441                            |
| Pine          | 290         | 0.04648                                                  | 0.83055                                 | 0.05560                                             | 0.82361                            |
| Pine          | 295         | 0.04651                                                  | 0.83013                                 | 0.05527                                             | 0.82287                            |
| Pine          | 300         | 0.04648                                                  | 0.83005                                 | 0.05445                                             | 0.82283                            |
| Pine          | 305         | 0.04645                                                  | 0.83001                                 | 0.05578                                             | 0.82290                            |
| Pine          | 310         | 0.04643                                                  | 0.82986                                 | 0.05707                                             | 0.82276                            |
| Pine          | 315         | 0.04643                                                  | 0.82958                                 | 0.05535                                             | 0.82238                            |
| Pine          | 320         | 0.04643                                                  | 0.82928                                 | 0.05556                                             | 0.82201                            |
| Pine          | 325         | 0.04643                                                  | 0.82885                                 | 0.05487                                             | 0.82147                            |
| Pine          | 330         | 0.04643                                                  | 0.82827                                 | 0.05419                                             | 0.82081                            |
| Pine          | 335         | 0.04641                                                  | 0.82780                                 | 0.05388                                             | 0.82038                            |
| Pine          | 340         | 0.04637                                                  | 0.82765                                 | 0.05375                                             | 0.82035                            |
| Pine          | 345         | 0.04634                                                  | 0.82752                                 | 0.05315                                             | 0.82034                            |
| Pine          | 350         | 0.04630                                                  | 0.82710                                 | 0.05306                                             | 0.82005                            |
| Pine          | 355         | 0.04626                                                  | 0.82658                                 | 0.05367                                             | 0.81970                            |
| Pine          | 360         | 0.04620                                                  | 0.82600                                 | 0.05409                                             | 0.81939                            |
| Pine          | 365         | 0.04614                                                  | 0.82548                                 | 0.05524                                             | 0.81916                            |
| Pine          | 370         | 0.04607                                                  | 0.82488                                 | 0.05528                                             | 0.81889                            |
| Pine          | 375         | 0.04599                                                  | 0.82419                                 | 0.05490                                             | 0.81861                            |
| Pine          | 380         | 0.04585                                                  | 0.82285                                 | 0.05412                                             | 0.81803                            |
| Pine          | 385         | 0.04571                                                  | 0.82157                                 | 0.05442                                             | 0.81757                            |
| Pine          | 390         | 0.04551                                                  | 0.81975                                 | 0.05446                                             | 0.81696                            |
| Pine          | 395         | 0.04547                                                  | 0.81980                                 | 0.05515                                             | 0.81710                            |
| Pine          | 400         | 0.04536                                                  | 0.81903                                 | 0.05650                                             | 0.81687                            |

**Table S3.** Predicted and true values of  $c$  and  $n$  for Iroko, Pine and Paulownia wood (continuation).

| Sample<br>(-) | Time<br>(s) | $c$ Predicted<br>(kJ mol <sup>-1</sup> K <sup>-1</sup> ) | $n$ Predicted<br>(mol s <sup>-1</sup> ) | $c$ True<br>(kJ mol <sup>-1</sup> K <sup>-1</sup> ) | $n$ True<br>(mol s <sup>-1</sup> ) |
|---------------|-------------|----------------------------------------------------------|-----------------------------------------|-----------------------------------------------------|------------------------------------|
| Pine          | 405         | 0.04523                                                  | 0.81797                                 | 0.05505                                             | 0.81656                            |
| Pine          | 410         | 0.04505                                                  | 0.81634                                 | 0.05620                                             | 0.81605                            |
| Pine          | 415         | 0.04493                                                  | 0.81524                                 | 0.05699                                             | 0.81571                            |
| Pine          | 420         | 0.04476                                                  | 0.81292                                 | 0.05498                                             | 0.81479                            |
| Pine          | 425         | 0.04469                                                  | 0.81141                                 | 0.05481                                             | 0.81416                            |
| Pine          | 430         | 0.04464                                                  | 0.81115                                 | 0.05544                                             | 0.81404                            |
| Pine          | 435         | 0.04459                                                  | 0.81125                                 | 0.05652                                             | 0.81415                            |
| Pine          | 440         | 0.04457                                                  | 0.81008                                 | 0.05569                                             | 0.81356                            |
| Pine          | 445         | 0.04457                                                  | 0.80914                                 | 0.05533                                             | 0.81302                            |
| Pine          | 450         | 0.04459                                                  | 0.80837                                 | 0.05632                                             | 0.81254                            |
| Pine          | 455         | 0.04451                                                  | 0.80876                                 | 0.05711                                             | 0.81285                            |
| Pine          | 460         | 0.04456                                                  | 0.80784                                 | 0.05702                                             | 0.81227                            |
| Pine          | 465         | 0.04469                                                  | 0.80658                                 | 0.05634                                             | 0.81137                            |
| Pine          | 470         | 0.04481                                                  | 0.80562                                 | 0.05634                                             | 0.81068                            |
| Pine          | 475         | 0.04491                                                  | 0.80479                                 | 0.05739                                             | 0.81005                            |
| Pine          | 480         | 0.04508                                                  | 0.80370                                 | 0.05731                                             | 0.80927                            |
| Pine          | 485         | 0.04526                                                  | 0.80255                                 | 0.05695                                             | 0.80849                            |
| Pine          | 490         | 0.04542                                                  | 0.80157                                 | 0.05723                                             | 0.80780                            |
| Pine          | 495         | 0.04560                                                  | 0.80052                                 | 0.05749                                             | 0.80711                            |
| Pine          | 500         | 0.04583                                                  | 0.79918                                 | 0.05728                                             | 0.80624                            |
| Pine          | 505         | 0.04591                                                  | 0.79865                                 | 0.05748                                             | 0.80588                            |
| Pine          | 510         | 0.04613                                                  | 0.79736                                 | 0.05646                                             | 0.80508                            |
| Pine          | 515         | 0.04628                                                  | 0.79647                                 | 0.05667                                             | 0.80451                            |
| Pine          | 520         | 0.04630                                                  | 0.79624                                 | 0.05728                                             | 0.80436                            |
| Pine          | 525         | 0.04649                                                  | 0.79513                                 | 0.05782                                             | 0.80366                            |
| Pine          | 530         | 0.04675                                                  | 0.79371                                 | 0.05699                                             | 0.80280                            |
| Pine          | 535         | 0.04694                                                  | 0.79262                                 | 0.05802                                             | 0.80213                            |
| Pine          | 540         | 0.04710                                                  | 0.79173                                 | 0.05796                                             | 0.80159                            |
| Pine          | 545         | 0.04718                                                  | 0.79118                                 | 0.05808                                             | 0.80124                            |
| Pine          | 550         | 0.04739                                                  | 0.79002                                 | 0.05807                                             | 0.80052                            |
| Pine          | 555         | 0.04763                                                  | 0.78871                                 | 0.05829                                             | 0.79970                            |
| Pine          | 560         | 0.04784                                                  | 0.78760                                 | 0.05811                                             | 0.79899                            |
| Pine          | 565         | 0.04807                                                  | 0.78639                                 | 0.05798                                             | 0.79819                            |
| Pine          | 570         | 0.04818                                                  | 0.78573                                 | 0.06011                                             | 0.79773                            |
| Pine          | 575         | 0.04839                                                  | 0.78462                                 | 0.05816                                             | 0.79696                            |
| Pine          | 580         | 0.04865                                                  | 0.78336                                 | 0.05852                                             | 0.79604                            |
| Pine          | 585         | 0.04894                                                  | 0.78199                                 | 0.05964                                             | 0.79496                            |
| Pine          | 590         | 0.04928                                                  | 0.78047                                 | 0.06054                                             | 0.79362                            |
| Pine          | 595         | 0.04967                                                  | 0.77888                                 | 0.05903                                             | 0.79197                            |
| Pine          | 600         | 0.04985                                                  | 0.77813                                 | 0.05812                                             | 0.79107                            |

**Table S3.** Predicted and true values of  $c$  and  $n$  for Iroko, Pine and Paulownia wood (continuation).

| Sample<br>(-) | Time<br>(s) | $c$ Predicted<br>(kJ mol <sup>-1</sup> K <sup>-1</sup> ) | $n$ Predicted<br>(mol s <sup>-1</sup> ) | $c$ True<br>(kJ mol <sup>-1</sup> K <sup>-1</sup> ) | $n$ True<br>(mol s <sup>-1</sup> ) |
|---------------|-------------|----------------------------------------------------------|-----------------------------------------|-----------------------------------------------------|------------------------------------|
| Pine          | 605         | 0.04996                                                  | 0.77762                                 | 0.06014                                             | 0.79042                            |
| Pine          | 610         | 0.05013                                                  | 0.77694                                 | 0.06115                                             | 0.78941                            |
| Pine          | 615         | 0.05034                                                  | 0.77620                                 | 0.06103                                             | 0.78807                            |
| Pine          | 620         | 0.05050                                                  | 0.77562                                 | 0.06135                                             | 0.78686                            |
| Pine          | 625         | 0.05054                                                  | 0.77534                                 | 0.06079                                             | 0.78630                            |
| Pine          | 630         | 0.05062                                                  | 0.77488                                 | 0.06007                                             | 0.78526                            |
| Pine          | 635         | 0.05065                                                  | 0.77454                                 | 0.05993                                             | 0.78455                            |
| Pine          | 640         | 0.05067                                                  | 0.77405                                 | 0.06005                                             | 0.78359                            |
| Pine          | 645         | 0.05064                                                  | 0.77378                                 | 0.06122                                             | 0.78310                            |
| Pine          | 650         | 0.05061                                                  | 0.77334                                 | 0.05964                                             | 0.78239                            |
| Pine          | 655         | 0.05055                                                  | 0.77285                                 | 0.05862                                             | 0.78168                            |
| Pine          | 660         | 0.05049                                                  | 0.77312                                 | 0.05984                                             | 0.78192                            |
| Pine          | 665         | 0.05042                                                  | 0.77301                                 | 0.05790                                             | 0.78168                            |
| Pine          | 670         | 0.05035                                                  | 0.77311                                 | 0.05627                                             | 0.78172                            |
| Pine          | 675         | 0.05029                                                  | 0.77337                                 | 0.05720                                             | 0.78208                            |
| Pine          | 680         | 0.05023                                                  | 0.77364                                 | 0.05577                                             | 0.78257                            |
| Pine          | 685         | 0.05018                                                  | 0.77391                                 | 0.05488                                             | 0.78336                            |
| Pine          | 690         | 0.05008                                                  | 0.77429                                 | 0.05346                                             | 0.78486                            |
| Pine          | 695         | 0.04991                                                  | 0.77477                                 | 0.05318                                             | 0.78649                            |
| Pine          | 700         | 0.04964                                                  | 0.77569                                 | 0.05210                                             | 0.78838                            |
| Pine          | 705         | 0.04927                                                  | 0.77711                                 | 0.05007                                             | 0.79027                            |
| Pine          | 710         | 0.04883                                                  | 0.77896                                 | 0.04799                                             | 0.79208                            |
| Pine          | 715         | 0.04823                                                  | 0.78173                                 | 0.04628                                             | 0.79423                            |
| Pine          | 720         | 0.04744                                                  | 0.78548                                 | 0.04495                                             | 0.79667                            |
| Pine          | 725         | 0.04667                                                  | 0.78917                                 | 0.04291                                             | 0.79887                            |
| Pine          | 730         | 0.04559                                                  | 0.79438                                 | 0.04094                                             | 0.80204                            |
| Pine          | 735         | 0.04475                                                  | 0.79843                                 | 0.03934                                             | 0.80496                            |
| Pine          | 740         | 0.04415                                                  | 0.80146                                 | 0.03622                                             | 0.80828                            |
| Pine          | 745         | 0.04385                                                  | 0.80319                                 | 0.03375                                             | 0.81131                            |
| Pine          | 750         | 0.04323                                                  | 0.80660                                 | 0.03157                                             | 0.81479                            |
| Pine          | 755         | 0.04206                                                  | 0.81270                                 | 0.03097                                             | 0.81801                            |
| Pine          | 760         | 0.04128                                                  | 0.81815                                 | 0.03071                                             | 0.82071                            |
| Pine          | 765         | 0.04125                                                  | 0.82278                                 | 0.03009                                             | 0.82307                            |
| Pine          | 770         | 0.04178                                                  | 0.82780                                 | 0.02886                                             | 0.82532                            |
| Pine          | 775         | 0.04251                                                  | 0.83301                                 | 0.03002                                             | 0.82758                            |
| Pine          | 780         | 0.04318                                                  | 0.83784                                 | 0.03006                                             | 0.82982                            |
| Pine          | 785         | 0.04374                                                  | 0.84206                                 | 0.02973                                             | 0.83173                            |
| Pine          | 790         | 0.04435                                                  | 0.84698                                 | 0.02975                                             | 0.83399                            |
| Pine          | 795         | 0.04455                                                  | 0.84895                                 | 0.02994                                             | 0.83508                            |
| Pine          | 800         | 0.04468                                                  | 0.85071                                 | 0.02906                                             | 0.83633                            |

**Table S3.** Predicted and true values of  $c$  and  $n$  for Iroko, Pine and Paulownia wood (continuation).

| Sample<br>(-) | Time<br>(s) | $c$ Predicted<br>(kJ mol <sup>-1</sup> K <sup>-1</sup> ) | $n$ Predicted<br>(mol s <sup>-1</sup> ) | $c$ True<br>(kJ mol <sup>-1</sup> K <sup>-1</sup> ) | $n$ True<br>(mol s <sup>-1</sup> ) |
|---------------|-------------|----------------------------------------------------------|-----------------------------------------|-----------------------------------------------------|------------------------------------|
| Pine          | 805         | 0.04470                                                  | 0.85213                                 | 0.02977                                             | 0.83787                            |
| Pine          | 810         | 0.04460                                                  | 0.85278                                 | 0.03016                                             | 0.83924                            |
| Pine          | 815         | 0.04441                                                  | 0.85300                                 | 0.03153                                             | 0.84058                            |
| Pine          | 820         | 0.04422                                                  | 0.85294                                 | 0.03282                                             | 0.84155                            |
| Pine          | 825         | 0.04404                                                  | 0.85277                                 | 0.03217                                             | 0.84228                            |
| Pine          | 830         | 0.04381                                                  | 0.85250                                 | 0.03134                                             | 0.84329                            |
| Pine          | 835         | 0.04359                                                  | 0.85219                                 | 0.03267                                             | 0.84403                            |
| Pine          | 840         | 0.04335                                                  | 0.85181                                 | 0.03273                                             | 0.84481                            |
| Pine          | 845         | 0.04311                                                  | 0.85141                                 | 0.03383                                             | 0.84561                            |
| Pine          | 850         | 0.04290                                                  | 0.85103                                 | 0.03320                                             | 0.84628                            |
| Pine          | 855         | 0.04269                                                  | 0.85066                                 | 0.03375                                             | 0.84686                            |
| Pine          | 860         | 0.04251                                                  | 0.85033                                 | 0.03281                                             | 0.84729                            |
| Pine          | 865         | 0.04224                                                  | 0.84984                                 | 0.03657                                             | 0.84819                            |
| Pine          | 870         | 0.04205                                                  | 0.84948                                 | 0.03599                                             | 0.84874                            |
| Pine          | 875         | 0.04192                                                  | 0.84924                                 | 0.03566                                             | 0.84891                            |
| Pine          | 880         | 0.04176                                                  | 0.84894                                 | 0.03522                                             | 0.84931                            |
| Pine          | 885         | 0.04159                                                  | 0.84864                                 | 0.03597                                             | 0.84986                            |
| Pine          | 890         | 0.04140                                                  | 0.84835                                 | 0.03734                                             | 0.85049                            |
| Pine          | 895         | 0.04125                                                  | 0.84812                                 | 0.03784                                             | 0.85099                            |
| Pine          | 900         | 0.04110                                                  | 0.84794                                 | 0.03840                                             | 0.85147                            |
| Pine          | 905         | 0.04101                                                  | 0.84777                                 | 0.03448                                             | 0.85165                            |
| Pine          | 910         | 0.04082                                                  | 0.84778                                 | 0.03544                                             | 0.85258                            |
| Pine          | 915         | 0.04069                                                  | 0.84784                                 | 0.03520                                             | 0.85312                            |
| Pine          | 920         | 0.04061                                                  | 0.84781                                 | 0.03547                                             | 0.85334                            |
| Pine          | 925         | 0.04050                                                  | 0.84805                                 | 0.03643                                             | 0.85388                            |
| Pine          | 930         | 0.04042                                                  | 0.84819                                 | 0.03652                                             | 0.85418                            |
| Pine          | 935         | 0.04035                                                  | 0.84838                                 | 0.03702                                             | 0.85447                            |
| Pine          | 940         | 0.04030                                                  | 0.84838                                 | 0.03517                                             | 0.85459                            |
| Pine          | 945         | 0.04023                                                  | 0.84867                                 | 0.03654                                             | 0.85489                            |
| Pine          | 950         | 0.04016                                                  | 0.84951                                 | 0.03902                                             | 0.85546                            |
| Pine          | 955         | 0.04008                                                  | 0.85061                                 | 0.04114                                             | 0.85598                            |
| Pine          | 960         | 0.03999                                                  | 0.85290                                 | 0.04293                                             | 0.85679                            |
| Pine          | 965         | 0.03995                                                  | 0.85381                                 | 0.04166                                             | 0.85705                            |
| Pine          | 970         | 0.03993                                                  | 0.85390                                 | 0.04442                                             | 0.85710                            |
| Pine          | 975         | 0.03990                                                  | 0.85419                                 | 0.04206                                             | 0.85716                            |
| Pine          | 980         | 0.03985                                                  | 0.85632                                 | 0.04259                                             | 0.85763                            |
| Pine          | 985         | 0.03983                                                  | 0.85664                                 | 0.04357                                             | 0.85774                            |
| Pine          | 990         | 0.03986                                                  | 0.85430                                 | 0.04117                                             | 0.85729                            |
| Pine          | 995         | 0.03985                                                  | 0.85430                                 | 0.04429                                             | 0.85732                            |
| Pine          | 1000        | 0.03982                                                  | 0.85590                                 | 0.04481                                             | 0.85767                            |

**Table S3.** Predicted and true values of  $c$  and  $n$  for Iroko, Pine and Paulownia wood (continuation).

| Sample<br>(-) | Time<br>(s) | $c$ Predicted<br>(kJ mol <sup>-1</sup> K <sup>-1</sup> ) | $n$ Predicted<br>(mol s <sup>-1</sup> ) | $c$ True<br>(kJ mol <sup>-1</sup> K <sup>-1</sup> ) | $n$ True<br>(mol s <sup>-1</sup> ) |
|---------------|-------------|----------------------------------------------------------|-----------------------------------------|-----------------------------------------------------|------------------------------------|
| Pine          | 1005        | 0.03980                                                  | 0.85696                                 | 0.04648                                             | 0.85790                            |
| Pine          | 1010        | 0.03975                                                  | 0.86073                                 | 0.04558                                             | 0.85853                            |
| Pine          | 1015        | 0.03973                                                  | 0.86200                                 | 0.04335                                             | 0.85872                            |
| Pine          | 1020        | 0.03973                                                  | 0.86234                                 | 0.04474                                             | 0.85877                            |
| Pine          | 1025        | 0.03973                                                  | 0.86291                                 | 0.04583                                             | 0.85886                            |
| Pine          | 1030        | 0.03973                                                  | 0.86396                                 | 0.04634                                             | 0.85899                            |
| Pine          | 1035        | 0.03973                                                  | 0.86468                                 | 0.04496                                             | 0.85910                            |
| Pine          | 1040        | 0.03972                                                  | 0.86693                                 | 0.04522                                             | 0.85936                            |
| Pine          | 1045        | 0.03974                                                  | 0.86674                                 | 0.04567                                             | 0.85936                            |
| Pine          | 1050        | 0.03975                                                  | 0.86761                                 | 0.04537                                             | 0.85949                            |
| Pine          | 1055        | 0.03976                                                  | 0.86795                                 | 0.04597                                             | 0.85956                            |
| Pine          | 1060        | 0.03976                                                  | 0.86983                                 | 0.04477                                             | 0.85975                            |
| Pine          | 1065        | 0.03980                                                  | 0.86833                                 | 0.04620                                             | 0.85962                            |
| Pine          | 1070        | 0.03981                                                  | 0.87025                                 | 0.04824                                             | 0.85981                            |
| Pine          | 1075        | 0.03981                                                  | 0.87330                                 | 0.04777                                             | 0.86011                            |
| Pine          | 1080        | 0.03982                                                  | 0.87680                                 | 0.04951                                             | 0.86042                            |
| Pine          | 1085        | 0.03984                                                  | 0.87896                                 | 0.04739                                             | 0.86059                            |
| Pine          | 1090        | 0.03986                                                  | 0.88096                                 | 0.04959                                             | 0.86077                            |
| Pine          | 1095        | 0.03990                                                  | 0.88143                                 | 0.05217                                             | 0.86082                            |
| Pine          | 1100        | 0.03992                                                  | 0.88538                                 | 0.05138                                             | 0.86112                            |
| Pine          | 1105        | 0.03996                                                  | 0.88572                                 | 0.05063                                             | 0.86116                            |
| Pine          | 1110        | 0.04001                                                  | 0.88496                                 | 0.04801                                             | 0.86112                            |
| Pine          | 1115        | 0.04006                                                  | 0.88681                                 | 0.04592                                             | 0.86126                            |
| Pine          | 1120        | 0.04010                                                  | 0.89137                                 | 0.04755                                             | 0.86158                            |
| Pine          | 1125        | 0.04016                                                  | 0.89004                                 | 0.04675                                             | 0.86152                            |
| Pine          | 1130        | 0.04022                                                  | 0.88799                                 | 0.04908                                             | 0.86141                            |
| Pine          | 1135        | 0.04028                                                  | 0.88520                                 | 0.04893                                             | 0.86125                            |
| Pine          | 1140        | 0.04034                                                  | 0.88685                                 | 0.05011                                             | 0.86137                            |
| Pine          | 1145        | 0.04041                                                  | 0.88922                                 | 0.04826                                             | 0.86155                            |
| Pine          | 1150        | 0.04048                                                  | 0.89009                                 | 0.04911                                             | 0.86161                            |
| Pine          | 1155        | 0.04055                                                  | 0.89131                                 | 0.05088                                             | 0.86173                            |
| Pine          | 1160        | 0.04063                                                  | 0.89122                                 | 0.05088                                             | 0.86174                            |
| Pine          | 1165        | 0.04072                                                  | 0.89314                                 | 0.05033                                             | 0.86190                            |
| Pine          | 1170        | 0.04081                                                  | 0.89419                                 | 0.04817                                             | 0.86198                            |
| Pine          | 1175        | 0.04090                                                  | 0.89429                                 | 0.04614                                             | 0.86202                            |
| Pine          | 1180        | 0.04101                                                  | 0.89779                                 | 0.04782                                             | 0.86226                            |
| Pine          | 1185        | 0.04109                                                  | 0.89494                                 | 0.04917                                             | 0.86210                            |
| Pine          | 1190        | 0.04116                                                  | 0.89121                                 | 0.04443                                             | 0.86191                            |
| Pine          | 1195        | 0.04129                                                  | 0.89506                                 | 0.05010                                             | 0.86218                            |
| Pine          | 1200        | 0.04141                                                  | 0.89612                                 | 0.04757                                             | 0.86229                            |

**Table S3.** Predicted and true values of  $c$  and  $n$  for Iroko, Pine and Paulownia wood (continuation).

| Sample<br>(-) | Time<br>(s) | $c$ Predicted<br>(kJ mol <sup>-1</sup> K <sup>-1</sup> ) | $n$ Predicted<br>(mol s <sup>-1</sup> ) | $c$ True<br>(kJ mol <sup>-1</sup> K <sup>-1</sup> ) | $n$ True<br>(mol s <sup>-1</sup> ) |
|---------------|-------------|----------------------------------------------------------|-----------------------------------------|-----------------------------------------------------|------------------------------------|
| Pine          | 1205        | 0.04155                                                  | 0.89764                                 | 0.05155                                             | 0.86244                            |
| Pine          | 1210        | 0.04168                                                  | 0.89866                                 | 0.05059                                             | 0.86252                            |
| Pine          | 1215        | 0.04189                                                  | 0.90374                                 | 0.05393                                             | 0.86289                            |
| Pine          | 1220        | 0.04206                                                  | 0.90495                                 | 0.05570                                             | 0.86301                            |
| Pine          | 1225        | 0.04212                                                  | 0.90121                                 | 0.05317                                             | 0.86279                            |
| Pine          | 1230        | 0.04228                                                  | 0.90220                                 | 0.05148                                             | 0.86288                            |
| Pine          | 1235        | 0.04260                                                  | 0.90838                                 | 0.05483                                             | 0.86338                            |
| Pine          | 1240        | 0.04273                                                  | 0.90727                                 | 0.05338                                             | 0.86337                            |
| Pine          | 1245        | 0.04280                                                  | 0.90401                                 | 0.05258                                             | 0.86315                            |
| Pine          | 1250        | 0.04291                                                  | 0.90241                                 | 0.05387                                             | 0.86308                            |
| Pine          | 1255        | 0.04322                                                  | 0.90618                                 | 0.05772                                             | 0.86342                            |
| Pine          | 1260        | 0.04330                                                  | 0.90346                                 | 0.05292                                             | 0.86325                            |
| Pine          | 1265        | 0.04339                                                  | 0.90123                                 | 0.05082                                             | 0.86314                            |
| Pine          | 1270        | 0.04355                                                  | 0.90058                                 | 0.05144                                             | 0.86314                            |
| Pine          | 1275        | 0.04373                                                  | 0.90050                                 | 0.05341                                             | 0.86318                            |
| Pine          | 1280        | 0.04417                                                  | 0.90534                                 | 0.05293                                             | 0.86364                            |
| Pine          | 1285        | 0.04451                                                  | 0.90726                                 | 0.05375                                             | 0.86391                            |
| Pine          | 1290        | 0.04478                                                  | 0.90771                                 | 0.05452                                             | 0.86402                            |
| Pine          | 1295        | 0.04517                                                  | 0.90910                                 | 0.05566                                             | 0.86429                            |
| Pine          | 1300        | 0.04542                                                  | 0.90872                                 | 0.05772                                             | 0.86437                            |
| Pine          | 1305        | 0.04526                                                  | 0.90449                                 | 0.05449                                             | 0.86396                            |
| Pine          | 1310        | 0.04558                                                  | 0.90506                                 | 0.05442                                             | 0.86415                            |
| Pine          | 1315        | 0.04564                                                  | 0.90306                                 | 0.05554                                             | 0.86401                            |
| Pine          | 1320        | 0.04580                                                  | 0.90205                                 | 0.05461                                             | 0.86398                            |
| Pine          | 1325        | 0.04602                                                  | 0.90153                                 | 0.05398                                             | 0.86403                            |
| Pine          | 1330        | 0.04599                                                  | 0.89878                                 | 0.05308                                             | 0.86376                            |
| Pine          | 1335        | 0.04656                                                  | 0.90134                                 | 0.05255                                             | 0.86422                            |
| Pine          | 1340        | 0.04694                                                  | 0.90165                                 | 0.05425                                             | 0.86445                            |
| Pine          | 1345        | 0.04699                                                  | 0.90002                                 | 0.05525                                             | 0.86431                            |
| Pine          | 1350        | 0.04702                                                  | 0.89827                                 | 0.05508                                             | 0.86415                            |
| Pine          | 1355        | 0.04717                                                  | 0.89724                                 | 0.05294                                             | 0.86413                            |
| Pine          | 1360        | 0.04743                                                  | 0.89694                                 | 0.05338                                             | 0.86421                            |
| Pine          | 1365        | 0.04761                                                  | 0.89612                                 | 0.05441                                             | 0.86423                            |
| Pine          | 1370        | 0.04764                                                  | 0.89457                                 | 0.05145                                             | 0.86410                            |
| Pine          | 1375        | 0.04805                                                  | 0.89492                                 | 0.05365                                             | 0.86434                            |
| Pine          | 1380        | 0.04784                                                  | 0.89220                                 | 0.05249                                             | 0.86397                            |
| Pine          | 1385        | 0.04819                                                  | 0.89244                                 | 0.05363                                             | 0.86418                            |
| Pine          | 1390        | 0.04859                                                  | 0.89257                                 | 0.05411                                             | 0.86442                            |
| Pine          | 1395        | 0.04885                                                  | 0.89203                                 | 0.05442                                             | 0.86452                            |
| Pine          | 1400        | 0.04887                                                  | 0.89080                                 | 0.05686                                             | 0.86440                            |



**Table S3.** Predicted and true values of  $c$  and  $n$  for Iroko, Pine and Paulownia wood (continuation).

| Sample<br>(-) | Time<br>(s) | $c$ Predicted<br>(kJ mol <sup>-1</sup> K <sup>-1</sup> ) | $n$ Predicted<br>(mol s <sup>-1</sup> ) | $c$ True<br>(kJ mol <sup>-1</sup> K <sup>-1</sup> ) | $n$ True<br>(mol s <sup>-1</sup> ) |
|---------------|-------------|----------------------------------------------------------|-----------------------------------------|-----------------------------------------------------|------------------------------------|
| Pine          | 1405        | 0.04887                                                  | 0.88945                                 | 0.05372                                             | 0.86427                            |
| Pine          | 1410        | 0.04878                                                  | 0.88768                                 | 0.05470                                             | 0.86405                            |
| Pine          | 1415        | 0.04879                                                  | 0.88632                                 | 0.05285                                             | 0.86395                            |
| Pine          | 1420        | 0.04905                                                  | 0.88612                                 | 0.05317                                             | 0.86407                            |
| Pine          | 1425        | 0.04924                                                  | 0.88560                                 | 0.05313                                             | 0.86414                            |
| Pine          | 1430        | 0.04939                                                  | 0.88492                                 | 0.05373                                             | 0.86415                            |
| Pine          | 1435        | 0.04959                                                  | 0.88445                                 | 0.05381                                             | 0.86421                            |
| Pine          | 1440        | 0.04928                                                  | 0.88196                                 | 0.05396                                             | 0.86380                            |
| Pine          | 1445        | 0.04940                                                  | 0.88131                                 | 0.05627                                             | 0.86383                            |
| Pine          | 1450        | 0.04983                                                  | 0.88189                                 | 0.05451                                             | 0.86412                            |
| Pine          | 1455        | 0.05026                                                  | 0.88211                                 | 0.05547                                             | 0.86440                            |
| Pine          | 1460        | 0.05076                                                  | 0.88210                                 | 0.05375                                             | 0.86472                            |
| Pine          | 1465        | 0.05083                                                  | 0.88136                                 | 0.05252                                             | 0.86469                            |
| Pine          | 1470        | 0.05093                                                  | 0.88069                                 | 0.05412                                             | 0.86468                            |
| Pine          | 1475        | 0.05111                                                  | 0.88014                                 | 0.05583                                             | 0.86475                            |
| Pine          | 1480        | 0.05110                                                  | 0.87939                                 | 0.05415                                             | 0.86465                            |
| Pine          | 1485        | 0.05159                                                  | 0.87913                                 | 0.05747                                             | 0.86498                            |
| Pine          | 1490        | 0.05200                                                  | 0.87853                                 | 0.05698                                             | 0.86523                            |
| Pine          | 1495        | 0.05179                                                  | 0.87801                                 | 0.05689                                             | 0.86499                            |
| Pine          | 1500        | 0.05182                                                  | 0.87746                                 | 0.05317                                             | 0.86493                            |
| Pine          | 1505        | 0.05205                                                  | 0.87702                                 | 0.05364                                             | 0.86505                            |
| Pine          | 1510        | 0.05207                                                  | 0.87653                                 | 0.05471                                             | 0.86501                            |
| Pine          | 1515        | 0.05217                                                  | 0.87609                                 | 0.05523                                             | 0.86504                            |
| Pine          | 1520        | 0.05241                                                  | 0.87569                                 | 0.05456                                             | 0.86519                            |
| Pine          | 1525        | 0.05235                                                  | 0.87527                                 | 0.05160                                             | 0.86508                            |
| Pine          | 1530        | 0.05241                                                  | 0.87489                                 | 0.05155                                             | 0.86507                            |
| Pine          | 1535        | 0.05226                                                  | 0.87437                                 | 0.05014                                             | 0.86489                            |
| Pine          | 1540        | 0.05210                                                  | 0.87371                                 | 0.04845                                             | 0.86470                            |
| Pine          | 1545        | 0.05216                                                  | 0.87336                                 | 0.05212                                             | 0.86470                            |
| Pine          | 1550        | 0.05204                                                  | 0.87267                                 | 0.05308                                             | 0.86452                            |
| Pine          | 1555        | 0.05271                                                  | 0.87332                                 | 0.05319                                             | 0.86506                            |
| Pine          | 1560        | 0.05300                                                  | 0.87322                                 | 0.05186                                             | 0.86526                            |
| Pine          | 1565        | 0.05265                                                  | 0.87264                                 | 0.04919                                             | 0.86489                            |
| Pine          | 1570        | 0.05279                                                  | 0.87253                                 | 0.05278                                             | 0.86498                            |
| Pine          | 1575        | 0.05275                                                  | 0.87219                                 | 0.05496                                             | 0.86488                            |
| Pine          | 1580        | 0.05295                                                  | 0.87222                                 | 0.05590                                             | 0.86502                            |
| Pine          | 1585        | 0.05301                                                  | 0.87207                                 | 0.05577                                             | 0.86503                            |
| Pine          | 1590        | 0.05273                                                  | 0.87131                                 | 0.05261                                             | 0.86473                            |
| Pine          | 1595        | 0.05267                                                  | 0.87089                                 | 0.05221                                             | 0.86462                            |
| Pine          | 1600        | 0.05302                                                  | 0.87145                                 | 0.05348                                             | 0.86489                            |

**Table S3.** Predicted and true values of  $c$  and  $n$  for Iroko, Pine and Paulownia wood (continuation).

| Sample<br>(-) | Time<br>(s) | $c$ Predicted<br>(kJ mol <sup>-1</sup> K <sup>-1</sup> ) | $n$ Predicted<br>(mol s <sup>-1</sup> ) | $c$ True<br>(kJ mol <sup>-1</sup> K <sup>-1</sup> ) | $n$ True<br>(mol s <sup>-1</sup> ) |
|---------------|-------------|----------------------------------------------------------|-----------------------------------------|-----------------------------------------------------|------------------------------------|
| Pine          | 1605        | 0.05329                                                  | 0.87174                                 | 0.05470                                             | 0.86511                            |
| Pine          | 1610        | 0.05325                                                  | 0.87151                                 | 0.05427                                             | 0.86503                            |
| Pine          | 1615        | 0.05336                                                  | 0.87156                                 | 0.05476                                             | 0.86509                            |
| Pine          | 1620        | 0.05358                                                  | 0.87180                                 | 0.05346                                             | 0.86526                            |
| Pine          | 1625        | 0.05389                                                  | 0.87209                                 | 0.05652                                             | 0.86552                            |
| Pine          | 1630        | 0.05389                                                  | 0.87205                                 | 0.05513                                             | 0.86548                            |
| Pine          | 1635        | 0.05413                                                  | 0.87224                                 | 0.05672                                             | 0.86568                            |
| Pine          | 1640        | 0.05409                                                  | 0.87221                                 | 0.05617                                             | 0.86561                            |
| Pine          | 1645        | 0.05437                                                  | 0.87242                                 | 0.05816                                             | 0.86586                            |
| Pine          | 1650        | 0.05437                                                  | 0.87246                                 | 0.05811                                             | 0.86582                            |
| Pine          | 1655        | 0.05434                                                  | 0.87248                                 | 0.05412                                             | 0.86576                            |
| Pine          | 1660        | 0.05443                                                  | 0.87258                                 | 0.05637                                             | 0.86581                            |
| Pine          | 1665        | 0.05442                                                  | 0.87260                                 | 0.05826                                             | 0.86577                            |
| Pine          | 1670        | 0.05437                                                  | 0.87257                                 | 0.05711                                             | 0.86569                            |
| Pine          | 1675        | 0.05450                                                  | 0.87276                                 | 0.05756                                             | 0.86581                            |
| Pine          | 1680        | 0.05444                                                  | 0.87270                                 | 0.05987                                             | 0.86569                            |
| Pine          | 1685        | 0.05458                                                  | 0.87292                                 | 0.05481                                             | 0.86583                            |
| Pine          | 1690        | 0.05458                                                  | 0.87293                                 | 0.05494                                             | 0.86578                            |
| Pine          | 1695        | 0.05472                                                  | 0.87315                                 | 0.05654                                             | 0.86591                            |
| Pine          | 1700        | 0.05493                                                  | 0.87344                                 | 0.05695                                             | 0.86615                            |
| Pine          | 1705        | 0.05512                                                  | 0.87364                                 | 0.06064                                             | 0.86634                            |
| Pine          | 1710        | 0.05546                                                  | 0.87380                                 | 0.05724                                             | 0.86673                            |
| Pine          | 1715        | 0.05513                                                  | 0.87378                                 | 0.05439                                             | 0.86629                            |
| Pine          | 1720        | 0.05503                                                  | 0.87372                                 | 0.05644                                             | 0.86615                            |
| Pine          | 1725        | 0.05509                                                  | 0.87382                                 | 0.05796                                             | 0.86618                            |
| Pine          | 1730        | 0.05512                                                  | 0.87388                                 | 0.05473                                             | 0.86618                            |
| Pine          | 1735        | 0.05522                                                  | 0.87403                                 | 0.05548                                             | 0.86627                            |
| Pine          | 1740        | 0.05526                                                  | 0.87410                                 | 0.06038                                             | 0.86629                            |
| Pine          | 1745        | 0.05540                                                  | 0.87428                                 | 0.05532                                             | 0.86646                            |
| Pine          | 1750        | 0.05543                                                  | 0.87432                                 | 0.05619                                             | 0.86643                            |
| Pine          | 1755        | 0.05547                                                  | 0.87438                                 | 0.05835                                             | 0.86646                            |
| Pine          | 1760        | 0.05560                                                  | 0.87453                                 | 0.05969                                             | 0.86662                            |
| Pine          | 1765        | 0.05560                                                  | 0.87453                                 | 0.05995                                             | 0.86660                            |
| Pine          | 1770        | 0.05560                                                  | 0.87451                                 | 0.05945                                             | 0.86657                            |
| Pine          | 1775        | 0.05573                                                  | 0.87466                                 | 0.05993                                             | 0.86675                            |
| Pine          | 1780        | 0.05557                                                  | 0.87437                                 | 0.05636                                             | 0.86648                            |
| Pine          | 1785        | 0.05557                                                  | 0.87430                                 | 0.05403                                             | 0.86644                            |
| Pine          | 1790        | 0.05553                                                  | 0.87412                                 | 0.05558                                             | 0.86633                            |
| Pine          | 1795        | 0.05531                                                  | 0.87334                                 | 0.05508                                             | 0.86598                            |
| Pine          | 1800        | 0.05531                                                  | 0.87314                                 | 0.05490                                             | 0.86595                            |

**Table S3.** Predicted and true values of  $c$  and  $n$  for Iroko, Pine and Paulownia wood (continuation).

| Sample<br>(-) | Time<br>(s) | $c$ Predicted<br>(kJ mol <sup>-1</sup> K <sup>-1</sup> ) | $n$ Predicted<br>(mol s <sup>-1</sup> ) | $c$ True<br>(kJ mol <sup>-1</sup> K <sup>-1</sup> ) | $n$ True<br>(mol s <sup>-1</sup> ) |
|---------------|-------------|----------------------------------------------------------|-----------------------------------------|-----------------------------------------------------|------------------------------------|
| Paulownia     | 0           | 0.27204                                                  | 0.87483                                 | 0.24096                                             | 0.87326                            |
| Paulownia     | 5           | 0.16612                                                  | 0.85005                                 | 0.16008                                             | 0.86099                            |
| Paulownia     | 10          | 0.12369                                                  | 0.84963                                 | 0.11630                                             | 0.85494                            |
| Paulownia     | 15          | 0.10351                                                  | 0.84479                                 | 0.08956                                             | 0.85132                            |
| Paulownia     | 20          | 0.09317                                                  | 0.84280                                 | 0.07472                                             | 0.84984                            |
| Paulownia     | 25          | 0.08632                                                  | 0.84287                                 | 0.06589                                             | 0.84946                            |
| Paulownia     | 30          | 0.08127                                                  | 0.84428                                 | 0.06209                                             | 0.84977                            |
| Paulownia     | 35          | 0.07701                                                  | 0.84598                                 | 0.05676                                             | 0.85026                            |
| Paulownia     | 40          | 0.07373                                                  | 0.84840                                 | 0.05442                                             | 0.85121                            |
| Paulownia     | 45          | 0.07116                                                  | 0.85083                                 | 0.05289                                             | 0.85237                            |
| Paulownia     | 50          | 0.06889                                                  | 0.85255                                 | 0.05310                                             | 0.85336                            |
| Paulownia     | 55          | 0.06689                                                  | 0.85373                                 | 0.05051                                             | 0.85423                            |
| Paulownia     | 60          | 0.06517                                                  | 0.85454                                 | 0.04859                                             | 0.85502                            |
| Paulownia     | 65          | 0.06433                                                  | 0.85527                                 | 0.04892                                             | 0.85619                            |
| Paulownia     | 70          | 0.06350                                                  | 0.85556                                 | 0.04990                                             | 0.85720                            |
| Paulownia     | 75          | 0.06236                                                  | 0.85555                                 | 0.04933                                             | 0.85783                            |
| Paulownia     | 80          | 0.06124                                                  | 0.85542                                 | 0.05016                                             | 0.85836                            |
| Paulownia     | 85          | 0.06014                                                  | 0.85523                                 | 0.04879                                             | 0.85879                            |
| Paulownia     | 90          | 0.05959                                                  | 0.85487                                 | 0.04893                                             | 0.85961                            |
| Paulownia     | 95          | 0.05885                                                  | 0.85454                                 | 0.04987                                             | 0.86016                            |
| Paulownia     | 100         | 0.05828                                                  | 0.85415                                 | 0.05021                                             | 0.86083                            |
| Paulownia     | 105         | 0.05760                                                  | 0.85386                                 | 0.05136                                             | 0.86130                            |
| Paulownia     | 110         | 0.05690                                                  | 0.85364                                 | 0.05331                                             | 0.86163                            |
| Paulownia     | 115         | 0.05616                                                  | 0.85349                                 | 0.05299                                             | 0.86177                            |
| Paulownia     | 120         | 0.05567                                                  | 0.85331                                 | 0.04928                                             | 0.86224                            |
| Paulownia     | 125         | 0.05523                                                  | 0.85323                                 | 0.04921                                             | 0.86277                            |
| Paulownia     | 130         | 0.05476                                                  | 0.85321                                 | 0.05103                                             | 0.86314                            |
| Paulownia     | 135         | 0.05430                                                  | 0.85325                                 | 0.05010                                             | 0.86344                            |
| Paulownia     | 140         | 0.05388                                                  | 0.85334                                 | 0.05010                                             | 0.86372                            |
| Paulownia     | 145         | 0.05351                                                  | 0.85362                                 | 0.04666                                             | 0.86420                            |
| Paulownia     | 150         | 0.05313                                                  | 0.85385                                 | 0.04672                                             | 0.86446                            |
| Paulownia     | 155         | 0.05278                                                  | 0.85404                                 | 0.04713                                             | 0.86463                            |
| Paulownia     | 160         | 0.05245                                                  | 0.85450                                 | 0.04588                                             | 0.86497                            |
| Paulownia     | 165         | 0.05212                                                  | 0.85517                                 | 0.04683                                             | 0.86542                            |
| Paulownia     | 170         | 0.05182                                                  | 0.85566                                 | 0.04556                                             | 0.86566                            |
| Paulownia     | 175         | 0.05147                                                  | 0.85707                                 | 0.04179                                             | 0.86633                            |
| Paulownia     | 180         | 0.05108                                                  | 0.85923                                 | 0.04111                                             | 0.86710                            |
| Paulownia     | 185         | 0.05077                                                  | 0.86043                                 | 0.05007                                             | 0.86742                            |
| Paulownia     | 190         | 0.05046                                                  | 0.86181                                 | 0.04986                                             | 0.86778                            |
| Paulownia     | 195         | 0.05008                                                  | 0.86469                                 | 0.04966                                             | 0.86842                            |
| Paulownia     | 200         | 0.04983                                                  | 0.86564                                 | 0.05261                                             | 0.86856                            |

**Table S3.** Predicted and true values of  $c$  and  $n$  for Iroko, Pine and Paulownia wood (continuation).

| Sample<br>(-) | Time<br>(s) | $c$ Predicted<br>(kJ mol <sup>-1</sup> K <sup>-1</sup> ) | $n$ Predicted<br>(mol s <sup>-1</sup> ) | $c$ True<br>(kJ mol <sup>-1</sup> K <sup>-1</sup> ) | $n$ True<br>(mol s <sup>-1</sup> ) |
|---------------|-------------|----------------------------------------------------------|-----------------------------------------|-----------------------------------------------------|------------------------------------|
| Paulownia     | 205         | 0.04948                                                  | 0.86855                                 | 0.04648                                             | 0.86909                            |
| Paulownia     | 210         | 0.04916                                                  | 0.87135                                 | 0.04562                                             | 0.86946                            |
| Paulownia     | 215         | 0.04877                                                  | 0.87555                                 | 0.04590                                             | 0.87001                            |
| Paulownia     | 220         | 0.04851                                                  | 0.87779                                 | 0.04272                                             | 0.87022                            |
| Paulownia     | 225         | 0.04822                                                  | 0.88096                                 | 0.04299                                             | 0.87054                            |
| Paulownia     | 230         | 0.04788                                                  | 0.88532                                 | 0.04375                                             | 0.87096                            |
| Paulownia     | 235         | 0.04768                                                  | 0.88706                                 | 0.04527                                             | 0.87107                            |
| Paulownia     | 240         | 0.04761                                                  | 0.88626                                 | 0.04338                                             | 0.87097                            |
| Paulownia     | 245         | 0.04705                                                  | 0.89621                                 | 0.04225                                             | 0.87175                            |
| Paulownia     | 250         | 0.04672                                                  | 0.90150                                 | 0.04332                                             | 0.87208                            |
| Paulownia     | 255         | 0.04636                                                  | 0.90798                                 | 0.03937                                             | 0.87245                            |
| Paulownia     | 260         | 0.04596                                                  | 0.91553                                 | 0.03984                                             | 0.87285                            |
| Paulownia     | 265         | 0.04576                                                  | 0.91855                                 | 0.04075                                             | 0.87296                            |
| Paulownia     | 270         | 0.04519                                                  | 0.93092                                 | 0.04042                                             | 0.87351                            |
| Paulownia     | 275         | 0.04440                                                  | 0.94981                                 | 0.03842                                             | 0.87427                            |
| Paulownia     | 280         | 0.04386                                                  | 0.96266                                 | 0.03698                                             | 0.87467                            |
| Paulownia     | 285         | 0.04325                                                  | 0.97781                                 | 0.03968                                             | 0.87513                            |
| Paulownia     | 290         | 0.04256                                                  | 0.99540                                 | 0.03953                                             | 0.87563                            |
| Paulownia     | 295         | 0.04219                                                  | 1.00432                                 | 0.03808                                             | 0.87584                            |
| Paulownia     | 300         | 0.04208                                                  | 1.00612                                 | 0.03891                                             | 0.87585                            |
| Paulownia     | 305         | 0.04157                                                  | 1.01912                                 | 0.03719                                             | 0.87616                            |
| Paulownia     | 310         | 0.04122                                                  | 1.02802                                 | 0.03826                                             | 0.87637                            |
| Paulownia     | 315         | 0.04099                                                  | 1.03349                                 | 0.04088                                             | 0.87647                            |
| Paulownia     | 320         | 0.04090                                                  | 1.03511                                 | 0.03863                                             | 0.87647                            |
| Paulownia     | 325         | 0.04083                                                  | 1.03617                                 | 0.03776                                             | 0.87649                            |
| Paulownia     | 330         | 0.04063                                                  | 1.04094                                 | 0.03584                                             | 0.87660                            |
| Paulownia     | 335         | 0.04034                                                  | 1.04852                                 | 0.03722                                             | 0.87674                            |
| Paulownia     | 340         | 0.04026                                                  | 1.04992                                 | 0.03952                                             | 0.87672                            |
| Paulownia     | 345         | 0.04021                                                  | 1.05051                                 | 0.04018                                             | 0.87672                            |
| Paulownia     | 350         | 0.03992                                                  | 1.05822                                 | 0.04063                                             | 0.87689                            |
| Paulownia     | 355         | 0.03991                                                  | 1.05773                                 | 0.03973                                             | 0.87682                            |
| Paulownia     | 360         | 0.03983                                                  | 1.05912                                 | 0.03919                                             | 0.87682                            |
| Paulownia     | 365         | 0.03986                                                  | 1.05756                                 | 0.03953                                             | 0.87674                            |
| Paulownia     | 370         | 0.03956                                                  | 1.06567                                 | 0.04083                                             | 0.87692                            |
| Paulownia     | 375         | 0.03902                                                  | 1.08128                                 | 0.03975                                             | 0.87724                            |
| Paulownia     | 380         | 0.03895                                                  | 1.08265                                 | 0.03944                                             | 0.87723                            |
| Paulownia     | 385         | 0.03883                                                  | 1.08571                                 | 0.04095                                             | 0.87725                            |
| Paulownia     | 390         | 0.03890                                                  | 1.08278                                 | 0.04339                                             | 0.87718                            |
| Paulownia     | 395         | 0.03857                                                  | 1.09243                                 | 0.04044                                             | 0.87737                            |
| Paulownia     | 400         | 0.03812                                                  | 1.10571                                 | 0.04193                                             | 0.87764                            |

**Table S3.** Predicted and true values of  $c$  and  $n$  for Iroko, Pine and Paulownia wood (continuation).

| Sample<br>(-) | Time<br>(s) | $c$ Predicted<br>(kJ mol <sup>-1</sup> K <sup>-1</sup> ) | $n$ Predicted<br>(mol s <sup>-1</sup> ) | $c$ True<br>(kJ mol <sup>-1</sup> K <sup>-1</sup> ) | $n$ True<br>(mol s <sup>-1</sup> ) |
|---------------|-------------|----------------------------------------------------------|-----------------------------------------|-----------------------------------------------------|------------------------------------|
| Paulownia     | 405         | 0.03800                                                  | 1.10897                                 | 0.03948                                             | 0.87768                            |
| Paulownia     | 410         | 0.03749                                                  | 1.12458                                 | 0.04003                                             | 0.87801                            |
| Paulownia     | 415         | 0.03817                                                  | 1.10212                                 | 0.04364                                             | 0.87750                            |
| Paulownia     | 420         | 0.03884                                                  | 1.08019                                 | 0.03994                                             | 0.87699                            |
| Paulownia     | 425         | 0.03871                                                  | 1.08360                                 | 0.03829                                             | 0.87703                            |
| Paulownia     | 430         | 0.03879                                                  | 1.08041                                 | 0.03623                                             | 0.87695                            |
| Paulownia     | 435         | 0.03841                                                  | 1.09147                                 | 0.03715                                             | 0.87714                            |
| Paulownia     | 440         | 0.03833                                                  | 1.09327                                 | 0.03949                                             | 0.87716                            |
| Paulownia     | 445         | 0.03860                                                  | 1.08380                                 | 0.03687                                             | 0.87693                            |
| Paulownia     | 450         | 0.03847                                                  | 1.08724                                 | 0.04324                                             | 0.87700                            |
| Paulownia     | 455         | 0.03846                                                  | 1.08674                                 | 0.04066                                             | 0.87697                            |
| Paulownia     | 460         | 0.03826                                                  | 1.09204                                 | 0.04066                                             | 0.87705                            |
| Paulownia     | 465         | 0.03819                                                  | 1.09340                                 | 0.04282                                             | 0.87707                            |
| Paulownia     | 470         | 0.03831                                                  | 1.08858                                 | 0.04045                                             | 0.87695                            |
| Paulownia     | 475         | 0.03808                                                  | 1.09511                                 | 0.03862                                             | 0.87708                            |
| Paulownia     | 480         | 0.03808                                                  | 1.09416                                 | 0.04025                                             | 0.87704                            |
| Paulownia     | 485         | 0.03765                                                  | 1.10709                                 | 0.03808                                             | 0.87733                            |
| Paulownia     | 490         | 0.03802                                                  | 1.09389                                 | 0.03790                                             | 0.87701                            |
| Paulownia     | 495         | 0.03822                                                  | 1.08628                                 | 0.03662                                             | 0.87682                            |
| Paulownia     | 500         | 0.03818                                                  | 1.08660                                 | 0.03806                                             | 0.87681                            |
| Paulownia     | 505         | 0.03839                                                  | 1.07838                                 | 0.03735                                             | 0.87661                            |
| Paulownia     | 510         | 0.03835                                                  | 1.07868                                 | 0.03705                                             | 0.87661                            |
| Paulownia     | 515         | 0.03808                                                  | 1.08584                                 | 0.03680                                             | 0.87677                            |
| Paulownia     | 520         | 0.03797                                                  | 1.08838                                 | 0.03981                                             | 0.87682                            |
| Paulownia     | 525         | 0.03793                                                  | 1.08815                                 | 0.04261                                             | 0.87680                            |
| Paulownia     | 530         | 0.03741                                                  | 1.10382                                 | 0.05112                                             | 0.87716                            |
| Paulownia     | 535         | 0.03806                                                  | 1.08109                                 | 0.05673                                             | 0.87662                            |
| Paulownia     | 540         | 0.03874                                                  | 1.05756                                 | 0.05194                                             | 0.87604                            |
| Paulownia     | 545         | 0.03883                                                  | 1.05311                                 | 0.04504                                             | 0.87591                            |
| Paulownia     | 550         | 0.03873                                                  | 1.05476                                 | 0.04009                                             | 0.87594                            |
| Paulownia     | 555         | 0.03841                                                  | 1.06340                                 | 0.04140                                             | 0.87614                            |
| Paulownia     | 560         | 0.03839                                                  | 1.06206                                 | 0.03698                                             | 0.87611                            |
| Paulownia     | 565         | 0.03839                                                  | 1.06027                                 | 0.03884                                             | 0.87602                            |
| Paulownia     | 570         | 0.03860                                                  | 1.05201                                 | 0.03900                                             | 0.87578                            |
| Paulownia     | 575         | 0.03860                                                  | 1.05004                                 | 0.03465                                             | 0.87573                            |
| Paulownia     | 580         | 0.03872                                                  | 1.04415                                 | 0.03840                                             | 0.87559                            |
| Paulownia     | 585         | 0.03872                                                  | 1.04231                                 | 0.04033                                             | 0.87553                            |
| Paulownia     | 590         | 0.03854                                                  | 1.04581                                 | 0.04401                                             | 0.87559                            |
| Paulownia     | 595         | 0.03841                                                  | 1.04814                                 | 0.04363                                             | 0.87563                            |
| Paulownia     | 600         | 0.03825                                                  | 1.05087                                 | 0.04338                                             | 0.87570                            |

**Table S3.** Predicted and true values of  $c$  and  $n$  for Iroko, Pine and Paulownia wood (continuation).

| Sample<br>(-) | Time<br>(s) | $c$ Predicted<br>(kJ mol <sup>-1</sup> K <sup>-1</sup> ) | $n$ Predicted<br>(mol s <sup>-1</sup> ) | $c$ True<br>(kJ mol <sup>-1</sup> K <sup>-1</sup> ) | $n$ True<br>(mol s <sup>-1</sup> ) |
|---------------|-------------|----------------------------------------------------------|-----------------------------------------|-----------------------------------------------------|------------------------------------|
| Paulownia     | 605         | 0.03847                                                  | 1.04186                                 | 0.04514                                             | 0.87547                            |
| Paulownia     | 610         | 0.03853                                                  | 1.03761                                 | 0.04059                                             | 0.87535                            |
| Paulownia     | 615         | 0.03864                                                  | 1.03208                                 | 0.04502                                             | 0.87519                            |
| Paulownia     | 620         | 0.03859                                                  | 1.03115                                 | 0.04818                                             | 0.87515                            |
| Paulownia     | 625         | 0.03865                                                  | 1.02710                                 | 0.05186                                             | 0.87503                            |
| Paulownia     | 630         | 0.03859                                                  | 1.02646                                 | 0.04807                                             | 0.87500                            |
| Paulownia     | 635         | 0.03834                                                  | 1.03200                                 | 0.05193                                             | 0.87516                            |
| Paulownia     | 640         | 0.03850                                                  | 1.02466                                 | 0.04753                                             | 0.87497                            |
| Paulownia     | 645         | 0.03831                                                  | 1.02834                                 | 0.04912                                             | 0.87508                            |
| Paulownia     | 650         | 0.03868                                                  | 1.01411                                 | 0.04978                                             | 0.87465                            |
| Paulownia     | 655         | 0.03843                                                  | 1.01952                                 | 0.05271                                             | 0.87479                            |
| Paulownia     | 660         | 0.03841                                                  | 1.01759                                 | 0.05244                                             | 0.87472                            |
| Paulownia     | 665         | 0.03840                                                  | 1.01556                                 | 0.05141                                             | 0.87464                            |
| Paulownia     | 670         | 0.03864                                                  | 1.00547                                 | 0.05177                                             | 0.87435                            |
| Paulownia     | 675         | 0.03869                                                  | 1.00113                                 | 0.05201                                             | 0.87423                            |
| Paulownia     | 680         | 0.03876                                                  | 0.99658                                 | 0.05177                                             | 0.87408                            |
| Paulownia     | 685         | 0.03865                                                  | 0.99755                                 | 0.04993                                             | 0.87407                            |
| Paulownia     | 690         | 0.03856                                                  | 0.99788                                 | 0.04984                                             | 0.87408                            |
| Paulownia     | 695         | 0.03856                                                  | 0.99532                                 | 0.05040                                             | 0.87401                            |
| Paulownia     | 700         | 0.03837                                                  | 0.99895                                 | 0.04710                                             | 0.87411                            |
| Paulownia     | 705         | 0.03843                                                  | 0.99451                                 | 0.04449                                             | 0.87397                            |
| Paulownia     | 710         | 0.03839                                                  | 0.99329                                 | 0.04374                                             | 0.87393                            |
| Paulownia     | 715         | 0.03793                                                  | 1.00586                                 | 0.04428                                             | 0.87429                            |
| Paulownia     | 720         | 0.03759                                                  | 1.01495                                 | 0.04553                                             | 0.87454                            |
| Paulownia     | 725         | 0.03731                                                  | 1.02233                                 | 0.04509                                             | 0.87475                            |
| Paulownia     | 730         | 0.03718                                                  | 1.02457                                 | 0.04499                                             | 0.87480                            |
| Paulownia     | 735         | 0.03724                                                  | 1.02027                                 | 0.04464                                             | 0.87467                            |
| Paulownia     | 740         | 0.03740                                                  | 1.01254                                 | 0.04635                                             | 0.87443                            |
| Paulownia     | 745         | 0.03765                                                  | 1.00173                                 | 0.04361                                             | 0.87411                            |
| Paulownia     | 750         | 0.03790                                                  | 0.99080                                 | 0.04231                                             | 0.87378                            |
| Paulownia     | 755         | 0.03792                                                  | 0.98800                                 | 0.04191                                             | 0.87370                            |
| Paulownia     | 760         | 0.03776                                                  | 0.99171                                 | 0.04304                                             | 0.87381                            |
| Paulownia     | 765         | 0.03758                                                  | 0.99604                                 | 0.04554                                             | 0.87393                            |
| Paulownia     | 770         | 0.03750                                                  | 0.99716                                 | 0.04859                                             | 0.87397                            |
| Paulownia     | 775         | 0.03742                                                  | 0.99809                                 | 0.04653                                             | 0.87402                            |
| Paulownia     | 780         | 0.03750                                                  | 0.99340                                 | 0.04428                                             | 0.87386                            |
| Paulownia     | 785         | 0.03760                                                  | 0.98802                                 | 0.04421                                             | 0.87369                            |
| Paulownia     | 790         | 0.03761                                                  | 0.98624                                 | 0.04565                                             | 0.87363                            |
| Paulownia     | 795         | 0.03757                                                  | 0.98603                                 | 0.04424                                             | 0.87363                            |
| Paulownia     | 800         | 0.03762                                                  | 0.98268                                 | 0.03961                                             | 0.87350                            |

**Table S3.** Predicted and true values of  $c$  and  $n$  for Iroko, Pine and Paulownia wood (continuation).

| Sample<br>(-) | Time<br>(s) | $c$ Predicted<br>(kJ mol <sup>-1</sup> K <sup>-1</sup> ) | $n$ Predicted<br>(mol s <sup>-1</sup> ) | $c$ True<br>(kJ mol <sup>-1</sup> K <sup>-1</sup> ) | $n$ True<br>(mol s <sup>-1</sup> ) |
|---------------|-------------|----------------------------------------------------------|-----------------------------------------|-----------------------------------------------------|------------------------------------|
| Paulownia     | 805         | 0.03760                                                  | 0.98207                                 | 0.03900                                             | 0.87349                            |
| Paulownia     | 810         | 0.03745                                                  | 0.98653                                 | 0.04044                                             | 0.87363                            |
| Paulownia     | 815         | 0.03735                                                  | 0.98943                                 | 0.04296                                             | 0.87373                            |
| Paulownia     | 820         | 0.03720                                                  | 0.99474                                 | 0.04383                                             | 0.87390                            |
| Paulownia     | 825         | 0.03718                                                  | 0.99452                                 | 0.04280                                             | 0.87388                            |
| Paulownia     | 830         | 0.03715                                                  | 0.99512                                 | 0.04146                                             | 0.87392                            |
| Paulownia     | 835         | 0.03710                                                  | 0.99661                                 | 0.04111                                             | 0.87395                            |
| Paulownia     | 840         | 0.03721                                                  | 0.99102                                 | 0.04132                                             | 0.87378                            |
| Paulownia     | 845         | 0.03728                                                  | 0.98737                                 | 0.04063                                             | 0.87366                            |
| Paulownia     | 850         | 0.03744                                                  | 0.98011                                 | 0.04180                                             | 0.87343                            |
| Paulownia     | 855         | 0.03746                                                  | 0.97855                                 | 0.04230                                             | 0.87338                            |
| Paulownia     | 860         | 0.03756                                                  | 0.97373                                 | 0.03964                                             | 0.87321                            |
| Paulownia     | 865         | 0.03758                                                  | 0.97258                                 | 0.04079                                             | 0.87320                            |
| Paulownia     | 870         | 0.03756                                                  | 0.97335                                 | 0.04240                                             | 0.87324                            |
| Paulownia     | 875         | 0.03756                                                  | 0.97280                                 | 0.04270                                             | 0.87321                            |
| Paulownia     | 880         | 0.03749                                                  | 0.97628                                 | 0.04341                                             | 0.87333                            |
| Paulownia     | 885         | 0.03754                                                  | 0.97402                                 | 0.04410                                             | 0.87325                            |
| Paulownia     | 890         | 0.03740                                                  | 0.98172                                 | 0.04268                                             | 0.87353                            |
| Paulownia     | 895         | 0.03739                                                  | 0.98289                                 | 0.04097                                             | 0.87357                            |
| Paulownia     | 900         | 0.03745                                                  | 0.98026                                 | 0.03821                                             | 0.87350                            |
| Paulownia     | 905         | 0.03757                                                  | 0.97436                                 | 0.03752                                             | 0.87331                            |
| Paulownia     | 910         | 0.03765                                                  | 0.97098                                 | 0.03968                                             | 0.87320                            |
| Paulownia     | 915         | 0.03762                                                  | 0.97387                                 | 0.04001                                             | 0.87329                            |
| Paulownia     | 920         | 0.03763                                                  | 0.97444                                 | 0.04231                                             | 0.87333                            |
| Paulownia     | 925         | 0.03767                                                  | 0.97331                                 | 0.04029                                             | 0.87330                            |
| Paulownia     | 930         | 0.03760                                                  | 0.97963                                 | 0.04174                                             | 0.87353                            |
| Paulownia     | 935         | 0.03758                                                  | 0.98297                                 | 0.04132                                             | 0.87364                            |
| Paulownia     | 940         | 0.03766                                                  | 0.97946                                 | 0.04251                                             | 0.87352                            |
| Paulownia     | 945         | 0.03769                                                  | 0.98036                                 | 0.04305                                             | 0.87360                            |
| Paulownia     | 950         | 0.03778                                                  | 0.97604                                 | 0.03999                                             | 0.87345                            |
| Paulownia     | 955         | 0.03786                                                  | 0.97238                                 | 0.04124                                             | 0.87333                            |
| Paulownia     | 960         | 0.03790                                                  | 0.97270                                 | 0.04296                                             | 0.87333                            |
| Paulownia     | 965         | 0.03794                                                  | 0.97271                                 | 0.04341                                             | 0.87334                            |
| Paulownia     | 970         | 0.03795                                                  | 0.97581                                 | 0.04094                                             | 0.87350                            |
| Paulownia     | 975         | 0.03808                                                  | 0.96836                                 | 0.04204                                             | 0.87322                            |
| Paulownia     | 980         | 0.03811                                                  | 0.96947                                 | 0.04222                                             | 0.87330                            |
| Paulownia     | 985         | 0.03816                                                  | 0.96901                                 | 0.04232                                             | 0.87331                            |
| Paulownia     | 990         | 0.03820                                                  | 0.97009                                 | 0.04230                                             | 0.87339                            |
| Paulownia     | 995         | 0.03827                                                  | 0.96816                                 | 0.04127                                             | 0.87332                            |
| Paulownia     | 1000        | 0.03836                                                  | 0.96457                                 | 0.03856                                             | 0.87319                            |

**Table S3.** Predicted and true values of  $c$  and  $n$  for Iroko, Pine and Paulownia wood (continuation).

| Sample<br>(-) | Time<br>(s) | $c$ Predicted<br>(kJ mol <sup>-1</sup> K <sup>-1</sup> ) | $n$ Predicted<br>(mol s <sup>-1</sup> ) | $c$ True<br>(kJ mol <sup>-1</sup> K <sup>-1</sup> ) | $n$ True<br>(mol s <sup>-1</sup> ) |
|---------------|-------------|----------------------------------------------------------|-----------------------------------------|-----------------------------------------------------|------------------------------------|
| Paulownia     | 1005        | 0.03841                                                  | 0.96394                                 | 0.03691                                             | 0.87317                            |
| Paulownia     | 1010        | 0.03845                                                  | 0.96724                                 | 0.03711                                             | 0.87333                            |
| Paulownia     | 1015        | 0.03852                                                  | 0.96629                                 | 0.03884                                             | 0.87332                            |
| Paulownia     | 1020        | 0.03861                                                  | 0.96103                                 | 0.03628                                             | 0.87311                            |
| Paulownia     | 1025        | 0.03871                                                  | 0.95404                                 | 0.03729                                             | 0.87284                            |
| Paulownia     | 1030        | 0.03879                                                  | 0.95007                                 | 0.03550                                             | 0.87267                            |
| Paulownia     | 1035        | 0.03884                                                  | 0.95240                                 | 0.03789                                             | 0.87280                            |
| Paulownia     | 1040        | 0.03889                                                  | 0.95393                                 | 0.03694                                             | 0.87289                            |
| Paulownia     | 1045        | 0.03896                                                  | 0.95511                                 | 0.03607                                             | 0.87297                            |
| Paulownia     | 1050        | 0.03904                                                  | 0.95159                                 | 0.03580                                             | 0.87283                            |
| Paulownia     | 1055        | 0.03911                                                  | 0.95196                                 | 0.03549                                             | 0.87288                            |
| Paulownia     | 1060        | 0.03918                                                  | 0.95331                                 | 0.03624                                             | 0.87295                            |
| Paulownia     | 1065        | 0.03926                                                  | 0.95023                                 | 0.03429                                             | 0.87282                            |
| Paulownia     | 1070        | 0.03934                                                  | 0.95232                                 | 0.03507                                             | 0.87296                            |
| Paulownia     | 1075        | 0.03942                                                  | 0.95128                                 | 0.03291                                             | 0.87295                            |
| Paulownia     | 1080        | 0.03950                                                  | 0.94900                                 | 0.03283                                             | 0.87289                            |
| Paulownia     | 1085        | 0.03957                                                  | 0.94652                                 | 0.03543                                             | 0.87280                            |
| Paulownia     | 1090        | 0.03966                                                  | 0.94717                                 | 0.03575                                             | 0.87286                            |
| Paulownia     | 1095        | 0.03974                                                  | 0.94564                                 | 0.03421                                             | 0.87283                            |
| Paulownia     | 1100        | 0.03983                                                  | 0.94432                                 | 0.03399                                             | 0.87281                            |
| Paulownia     | 1105        | 0.03993                                                  | 0.94542                                 | 0.03467                                             | 0.87289                            |
| Paulownia     | 1110        | 0.04002                                                  | 0.94387                                 | 0.03302                                             | 0.87285                            |
| Paulownia     | 1115        | 0.04017                                                  | 0.94733                                 | 0.03387                                             | 0.87307                            |
| Paulownia     | 1120        | 0.04034                                                  | 0.95065                                 | 0.03459                                             | 0.87332                            |
| Paulownia     | 1125        | 0.04040                                                  | 0.94688                                 | 0.03871                                             | 0.87316                            |
| Paulownia     | 1130        | 0.04047                                                  | 0.94420                                 | 0.03629                                             | 0.87305                            |
| Paulownia     | 1135        | 0.04051                                                  | 0.93955                                 | 0.03639                                             | 0.87283                            |
| Paulownia     | 1140        | 0.04059                                                  | 0.93710                                 | 0.03218                                             | 0.87273                            |
| Paulownia     | 1145        | 0.04072                                                  | 0.93765                                 | 0.03546                                             | 0.87282                            |
| Paulownia     | 1150        | 0.04084                                                  | 0.93710                                 | 0.03649                                             | 0.87285                            |
| Paulownia     | 1155        | 0.04094                                                  | 0.93551                                 | 0.03663                                             | 0.87282                            |
| Paulownia     | 1160        | 0.04107                                                  | 0.93543                                 | 0.03632                                             | 0.87286                            |
| Paulownia     | 1165        | 0.04119                                                  | 0.93466                                 | 0.03529                                             | 0.87286                            |
| Paulownia     | 1170        | 0.04131                                                  | 0.93359                                 | 0.03551                                             | 0.87285                            |
| Paulownia     | 1175        | 0.04140                                                  | 0.93139                                 | 0.03627                                             | 0.87277                            |
| Paulownia     | 1180        | 0.04143                                                  | 0.92701                                 | 0.03520                                             | 0.87255                            |
| Paulownia     | 1185        | 0.04150                                                  | 0.92386                                 | 0.03497                                             | 0.87240                            |
| Paulownia     | 1190        | 0.04167                                                  | 0.92483                                 | 0.03431                                             | 0.87253                            |
| Paulownia     | 1195        | 0.04174                                                  | 0.92211                                 | 0.03140                                             | 0.87240                            |
| Paulownia     | 1200        | 0.04187                                                  | 0.92126                                 | 0.02952                                             | 0.87239                            |



**Table S3.** Predicted and true values of  $c$  and  $n$  for Iroko, Pine and Paulownia wood (continuation).

| Sample<br>(-) | Time<br>(s) | $c$ Predicted<br>(kJ mol <sup>-1</sup> K <sup>-1</sup> ) | $n$ Predicted<br>(mol s <sup>-1</sup> ) | $c$ True<br>(kJ mol <sup>-1</sup> K <sup>-1</sup> ) | $n$ True<br>(mol s <sup>-1</sup> ) |
|---------------|-------------|----------------------------------------------------------|-----------------------------------------|-----------------------------------------------------|------------------------------------|
| Paulownia     | 1205        | 0.04203                                                  | 0.92124                                 | 0.02926                                             | 0.87246                            |
| Paulownia     | 1210        | 0.04214                                                  | 0.91960                                 | 0.02982                                             | 0.87240                            |
| Paulownia     | 1215        | 0.04229                                                  | 0.91926                                 | 0.03231                                             | 0.87245                            |
| Paulownia     | 1220        | 0.04242                                                  | 0.91801                                 | 0.03483                                             | 0.87242                            |
| Paulownia     | 1225        | 0.04263                                                  | 0.91892                                 | 0.03587                                             | 0.87254                            |
| Paulownia     | 1230        | 0.04275                                                  | 0.91727                                 | 0.03617                                             | 0.87243                            |
| Paulownia     | 1235        | 0.04280                                                  | 0.91420                                 | 0.03709                                             | 0.87227                            |
| Paulownia     | 1240        | 0.04291                                                  | 0.91228                                 | 0.03351                                             | 0.87220                            |
| Paulownia     | 1245        | 0.04309                                                  | 0.91210                                 | 0.03152                                             | 0.87226                            |
| Paulownia     | 1250        | 0.04326                                                  | 0.91169                                 | 0.03352                                             | 0.87229                            |
| Paulownia     | 1255        | 0.04339                                                  | 0.91019                                 | 0.03219                                             | 0.87223                            |
| Paulownia     | 1260        | 0.04359                                                  | 0.91023                                 | 0.03168                                             | 0.87232                            |
| Paulownia     | 1265        | 0.04383                                                  | 0.91066                                 | 0.03197                                             | 0.87244                            |
| Paulownia     | 1270        | 0.04419                                                  | 0.91270                                 | 0.03238                                             | 0.87273                            |
| Paulownia     | 1275        | 0.04431                                                  | 0.91108                                 | 0.03352                                             | 0.87267                            |
| Paulownia     | 1280        | 0.04450                                                  | 0.91043                                 | 0.03109                                             | 0.87264                            |
| Paulownia     | 1285        | 0.04468                                                  | 0.90953                                 | 0.03296                                             | 0.87263                            |
| Paulownia     | 1290        | 0.04484                                                  | 0.90840                                 | 0.03485                                             | 0.87260                            |
| Paulownia     | 1295        | 0.04499                                                  | 0.90724                                 | 0.03335                                             | 0.87255                            |
| Paulownia     | 1300        | 0.04517                                                  | 0.90627                                 | 0.03163                                             | 0.87255                            |
| Paulownia     | 1305        | 0.04530                                                  | 0.90496                                 | 0.03208                                             | 0.87251                            |
| Paulownia     | 1310        | 0.04558                                                  | 0.90506                                 | 0.03275                                             | 0.87266                            |
| Paulownia     | 1315        | 0.04562                                                  | 0.90278                                 | 0.03418                                             | 0.87249                            |
| Paulownia     | 1320        | 0.04587                                                  | 0.90273                                 | 0.03468                                             | 0.87260                            |
| Paulownia     | 1325        | 0.04592                                                  | 0.90062                                 | 0.03239                                             | 0.87245                            |
| Paulownia     | 1330        | 0.04602                                                  | 0.89911                                 | 0.03315                                             | 0.87234                            |
| Paulownia     | 1335        | 0.04630                                                  | 0.89927                                 | 0.03278                                             | 0.87244                            |
| Paulownia     | 1340        | 0.04631                                                  | 0.89694                                 | 0.03397                                             | 0.87225                            |
| Paulownia     | 1345        | 0.04640                                                  | 0.89535                                 | 0.03369                                             | 0.87214                            |
| Paulownia     | 1350        | 0.04643                                                  | 0.89321                                 | 0.02954                                             | 0.87198                            |
| Paulownia     | 1355        | 0.04662                                                  | 0.89280                                 | 0.02788                                             | 0.87201                            |
| Paulownia     | 1360        | 0.04685                                                  | 0.89268                                 | 0.03048                                             | 0.87212                            |
| Paulownia     | 1365        | 0.04722                                                  | 0.89367                                 | 0.02911                                             | 0.87235                            |
| Paulownia     | 1370        | 0.04759                                                  | 0.89426                                 | 0.03101                                             | 0.87258                            |
| Paulownia     | 1375        | 0.04774                                                  | 0.89340                                 | 0.03124                                             | 0.87256                            |
| Paulownia     | 1380        | 0.04779                                                  | 0.89191                                 | 0.03062                                             | 0.87246                            |
| Paulownia     | 1385        | 0.04780                                                  | 0.89020                                 | 0.03023                                             | 0.87232                            |
| Paulownia     | 1390        | 0.04798                                                  | 0.88963                                 | 0.02865                                             | 0.87236                            |
| Paulownia     | 1395        | 0.04800                                                  | 0.88806                                 | 0.03107                                             | 0.87223                            |
| Paulownia     | 1400        | 0.04823                                                  | 0.88782                                 | 0.03106                                             | 0.87231                            |

**Table S3.** Predicted and true values of  $c$  and  $n$  for Iroko, Pine and Paulownia wood (continuation).

| Sample<br>(-) | Time<br>(s) | $c$ Predicted<br>(kJ mol <sup>-1</sup> K <sup>-1</sup> ) | $n$ Predicted<br>(mol s <sup>-1</sup> ) | $c$ True<br>(kJ mol <sup>-1</sup> K <sup>-1</sup> ) | $n$ True<br>(mol s <sup>-1</sup> ) |
|---------------|-------------|----------------------------------------------------------|-----------------------------------------|-----------------------------------------------------|------------------------------------|
| Paulownia     | 1405        | 0.04840                                                  | 0.88728                                 | 0.03099                                             | 0.87235                            |
| Paulownia     | 1410        | 0.04859                                                  | 0.88677                                 | 0.03281                                             | 0.87240                            |
| Paulownia     | 1415        | 0.04861                                                  | 0.88539                                 | 0.03409                                             | 0.87226                            |
| Paulownia     | 1420        | 0.04885                                                  | 0.88523                                 | 0.03188                                             | 0.87237                            |
| Paulownia     | 1425        | 0.04882                                                  | 0.88364                                 | 0.03231                                             | 0.87223                            |
| Paulownia     | 1430        | 0.04898                                                  | 0.88313                                 | 0.02934                                             | 0.87229                            |
| Paulownia     | 1435        | 0.04916                                                  | 0.88268                                 | 0.03077                                             | 0.87234                            |
| Paulownia     | 1440        | 0.04914                                                  | 0.88126                                 | 0.03278                                             | 0.87219                            |
| Paulownia     | 1445        | 0.04907                                                  | 0.87960                                 | 0.03084                                             | 0.87201                            |
| Paulownia     | 1450        | 0.04897                                                  | 0.87762                                 | 0.02960                                             | 0.87179                            |
| Paulownia     | 1455        | 0.04908                                                  | 0.87703                                 | 0.02922                                             | 0.87180                            |
| Paulownia     | 1460        | 0.04925                                                  | 0.87675                                 | 0.02837                                             | 0.87188                            |
| Paulownia     | 1465        | 0.04927                                                  | 0.87567                                 | 0.02972                                             | 0.87181                            |
| Paulownia     | 1470        | 0.04932                                                  | 0.87475                                 | 0.02962                                             | 0.87178                            |
| Paulownia     | 1475        | 0.04940                                                  | 0.87406                                 | 0.03033                                             | 0.87177                            |
| Paulownia     | 1480        | 0.04946                                                  | 0.87327                                 | 0.03174                                             | 0.87172                            |
| Paulownia     | 1485        | 0.04959                                                  | 0.87290                                 | 0.02933                                             | 0.87173                            |
| Paulownia     | 1490        | 0.04936                                                  | 0.87034                                 | 0.02838                                             | 0.87137                            |
| Paulownia     | 1495        | 0.04956                                                  | 0.87057                                 | 0.02891                                             | 0.87151                            |
| Paulownia     | 1500        | 0.04970                                                  | 0.87039                                 | 0.02744                                             | 0.87158                            |
| Paulownia     | 1505        | 0.04975                                                  | 0.86970                                 | 0.02765                                             | 0.87154                            |
| Paulownia     | 1510        | 0.04982                                                  | 0.86912                                 | 0.02751                                             | 0.87154                            |
| Paulownia     | 1515        | 0.04992                                                  | 0.86878                                 | 0.02781                                             | 0.87155                            |
| Paulownia     | 1520        | 0.05001                                                  | 0.86836                                 | 0.02683                                             | 0.87157                            |
| Paulownia     | 1525        | 0.05000                                                  | 0.86742                                 | 0.02714                                             | 0.87148                            |
| Paulownia     | 1530        | 0.05013                                                  | 0.86732                                 | 0.02740                                             | 0.87154                            |
| Paulownia     | 1535        | 0.05028                                                  | 0.86736                                 | 0.02731                                             | 0.87160                            |
| Paulownia     | 1540        | 0.05034                                                  | 0.86691                                 | 0.02655                                             | 0.87158                            |
| Paulownia     | 1545        | 0.05041                                                  | 0.86653                                 | 0.02813                                             | 0.87157                            |
| Paulownia     | 1550        | 0.05052                                                  | 0.86644                                 | 0.03012                                             | 0.87162                            |
| Paulownia     | 1555        | 0.05048                                                  | 0.86548                                 | 0.02922                                             | 0.87151                            |
| Paulownia     | 1560        | 0.05064                                                  | 0.86566                                 | 0.03104                                             | 0.87159                            |
| Paulownia     | 1565        | 0.05067                                                  | 0.86520                                 | 0.02903                                             | 0.87158                            |
| Paulownia     | 1570        | 0.05078                                                  | 0.86513                                 | 0.02912                                             | 0.87162                            |
| Paulownia     | 1575        | 0.05073                                                  | 0.86422                                 | 0.02846                                             | 0.87152                            |
| Paulownia     | 1580        | 0.05064                                                  | 0.86299                                 | 0.02910                                             | 0.87138                            |
| Paulownia     | 1585        | 0.05086                                                  | 0.86375                                 | 0.03141                                             | 0.87154                            |
| Paulownia     | 1590        | 0.05103                                                  | 0.86415                                 | 0.02946                                             | 0.87162                            |
| Paulownia     | 1595        | 0.05105                                                  | 0.86370                                 | 0.02786                                             | 0.87157                            |
| Paulownia     | 1600        | 0.05090                                                  | 0.86219                                 | 0.02688                                             | 0.87132                            |

Notice:  $c$  Predicted: molar heat capacity of combustion products at constant pressure predicted by trained neural network;  $n$  Predicted: chemical amount flow rate of combustion products predicted by trained neural network;  $c$  True: molar heat capacity of combustion products at constant pressure;  $n$  True: chemical amount flow rate of combustion products.
