# Supplementary material for: Improvement of Heat Release Rate Measurement from Woods Based on Their Combustion Products Temperature Rise
Source: MDPI journal article supplement (doi:10.3390/pr11041206), 2023-04-14
Supplement: s1 [file s1]

**Table S2.** Predicted and true values of HRR for Iroko, Pine and Paulownia wood.

| Sample<br>(-) | Time<br>(s) | HRR CC Ref.<br>(kW m <sup>-2</sup> ) | HRR NN_Model<br>(kW m <sup>-2</sup> ) | HRR nct_Model<br>(kW m <sup>-2</sup> ) |
|---------------|-------------|--------------------------------------|---------------------------------------|----------------------------------------|
| Iroko         | 0           | 2.789215                             | 0                                     | 0                                      |
| Iroko         | 5           | 1.788527                             | 0                                     | 0                                      |
| Iroko         | 10          | 0.962905                             | 0                                     | 0                                      |
| Iroko         | 15          | 1.014431                             | 0                                     | 0                                      |
| Iroko         | 20          | 0.14994                              | 0                                     | 0                                      |
| Iroko         | 25          | 0.840711                             | 0                                     | 0                                      |
| Iroko         | 30          | 197.4757                             | 142.8676                              | 21.71537                               |
| Iroko         | 35          | 278.3095                             | 162.0817                              | 59.65095                               |
| Iroko         | 40          | 225.6597                             | 157.8577                              | 76.96177                               |
| Iroko         | 45          | 181.8872                             | 154.3606                              | 85.06345                               |
| Iroko         | 50          | 159.9894                             | 151.3947                              | 90.5165                                |
| Iroko         | 55          | 151.0209                             | 148.3027                              | 94.19679                               |
| Iroko         | 60          | 144.5529                             | 145.175                               | 96.83278                               |
| Iroko         | 65          | 137.6714                             | 142.4271                              | 99.06454                               |
| Iroko         | 70          | 133.6347                             | 138.369                               | 99.59931                               |
| Iroko         | 75          | 128.0877                             | 134.3204                              | 99.65827                               |
| Iroko         | 80          | 127.3203                             | 130.2977                              | 99.30876                               |
| Iroko         | 85          | 119.7174                             | 126.4782                              | 98.74872                               |
| Iroko         | 90          | 118.3121                             | 122.78                                | 97.94866                               |
| Iroko         | 95          | 114.6794                             | 118.2244                              | 96.07904                               |
| Iroko         | 100         | 111.699                              | 115.3365                              | 95.4053                                |
| Iroko         | 105         | 111.4973                             | 112.2015                              | 94.26837                               |
| Iroko         | 110         | 109.4146                             | 109.2753                              | 93.10197                               |
| Iroko         | 115         | 107.2242                             | 106.4867                              | 91.86819                               |
| Iroko         | 120         | 102.7003                             | 103.7178                              | 90.48282                               |
| Iroko         | 125         | 100.5006                             | 101.7079                              | 89.64486                               |
| Iroko         | 130         | 100.3219                             | 100.5508                              | 89.46379                               |
| Iroko         | 135         | 97.71558                             | 99.27853                              | 89.06797                               |
| Iroko         | 140         | 97.02537                             | 97.83964                              | 88.42371                               |
| Iroko         | 145         | 97.73133                             | 96.57368                              | 87.85524                               |
| Iroko         | 150         | 96.76854                             | 95.20312                              | 87.11834                               |
| Iroko         | 155         | 95.87886                             | 94.36736                              | 86.81095                               |
| Iroko         | 160         | 91.72921                             | 93.15064                              | 86.09932                               |
| Iroko         | 165         | 92.03317                             | 92.33732                              | 85.71192                               |
| Iroko         | 170         | 91.8865                              | 91.47579                              | 85.2403                                |
| Iroko         | 175         | 89.31425                             | 90.10242                              | 84.2676                                |
| Iroko         | 180         | 88.97077                             | 89.0528                               | 83.56438                               |
| Iroko         | 185         | 87.37675                             | 87.7468                               | 82.60852                               |
| Iroko         | 190         | 89.19491                             | 86.93929                              | 82.08637                               |
| Iroko         | 195         | 86.22019                             | 85.3985                               | 80.89891                               |
| Iroko         | 200         | 85.78868                             | 84.03174                              | 79.86726                               |

**Table S2.** Predicted and true values of HRR for Iroko, Pine and Paulownia wood (continuation).

| Sample<br>(-) | Time<br>(s) | HRR CC Ref.<br>(kW m <sup>-2</sup> ) | HRR NN_Model<br>(kW m <sup>-2</sup> ) | HRR nct_Model<br>(kW m <sup>-2</sup> ) |
|---------------|-------------|--------------------------------------|---------------------------------------|----------------------------------------|
| Iroko         | 205         | 82.78307                             | 83.65847                              | 79.69882                               |
| Iroko         | 210         | 83.12793                             | 83.35062                              | 79.57671                               |
| Iroko         | 215         | 82.74298                             | 82.76869                              | 79.21036                               |
| Iroko         | 220         | 83.78145                             | 82.76925                              | 79.33669                               |
| Iroko         | 225         | 82.39863                             | 82.32926                              | 79.07983                               |
| Iroko         | 230         | 83.45113                             | 81.60893                              | 78.58294                               |
| Iroko         | 235         | 84.15894                             | 80.62034                              | 77.86289                               |
| Iroko         | 240         | 82.9928                              | 80.36834                              | 77.75762                               |
| Iroko         | 245         | 84.06374                             | 79.7537                               | 77.34916                               |
| Iroko         | 250         | 80.55648                             | 79.19107                              | 76.98282                               |
| Iroko         | 255         | 80.36286                             | 79.18357                              | 77.07125                               |
| Iroko         | 260         | 81.49904                             | 79.23595                              | 77.206                                 |
| Iroko         | 265         | 80.90053                             | 78.61487                              | 76.78491                               |
| Iroko         | 270         | 80.07691                             | 78.32976                              | 76.63753                               |
| Iroko         | 275         | 80.81873                             | 77.90462                              | 76.37225                               |
| Iroko         | 280         | 79.49751                             | 77.20926                              | 75.87958                               |
| Iroko         | 285         | 79.59275                             | 76.90668                              | 75.70693                               |
| Iroko         | 290         | 79.97607                             | 77.05201                              | 75.90484                               |
| Iroko         | 295         | 80.45751                             | 77.42617                              | 76.29224                               |
| Iroko         | 300         | 80.12712                             | 77.42837                              | 76.36804                               |
| Iroko         | 305         | 80.27109                             | 77.4427                               | 76.45225                               |
| Iroko         | 310         | 78.67045                             | 77.32897                              | 76.42699                               |
| Iroko         | 315         | 79.28945                             | 77.52213                              | 76.65858                               |
| Iroko         | 320         | 79.75756                             | 77.8212                               | 76.97861                               |
| Iroko         | 325         | 79.54162                             | 77.82696                              | 77.05019                               |
| Iroko         | 330         | 79.94519                             | 77.58245                              | 76.90703                               |
| Iroko         | 335         | 79.2284                              | 77.68154                              | 77.05441                               |
| Iroko         | 340         | 78.92797                             | 77.43992                              | 76.90703                               |
| Iroko         | 345         | 80.22336                             | 77.29591                              | 76.83965                               |
| Iroko         | 350         | 78.69017                             | 77.33808                              | 76.93229                               |
| Iroko         | 355         | 78.64909                             | 77.34855                              | 76.99545                               |
| Iroko         | 360         | 78.94922                             | 77.1864                               | 76.90281                               |
| Iroko         | 365         | 78.57493                             | 77.11342                              | 76.88597                               |
| Iroko         | 370         | 77.43939                             | 77.2106                               | 77.02072                               |
| Iroko         | 375         | 77.51871                             | 77.45704                              | 77.29021                               |
| Iroko         | 380         | 77.37686                             | 77.38512                              | 77.26916                               |
| Iroko         | 385         | 80.36944                             | 77.6138                               | 77.52181                               |
| Iroko         | 390         | 78.24105                             | 77.73275                              | 77.6734                                |
| Iroko         | 395         | 77.4875                              | 77.51719                              | 77.51339                               |
| Iroko         | 400         | 78.71429                             | 77.64333                              | 77.66919                               |

**Table S2.** Predicted and true values of HRR for Iroko, Pine and Paulownia wood (continuation).

| Sample<br>(-) | Time<br>(s) | HRR CC Ref.<br>(kW m <sup>-2</sup> ) | HRR NN_Model<br>(kW m <sup>-2</sup> ) | HRR nct_Model<br>(kW m <sup>-2</sup> ) |
|---------------|-------------|--------------------------------------|---------------------------------------|----------------------------------------|
| Iroko         | 405         | 79.79141                             | 78.01693                              | 78.05659                               |
| Iroko         | 410         | 79.93473                             | 78.17471                              | 78.24187                               |
| Iroko         | 415         | 81.46775                             | 78.35523                              | 78.4482                                |
| Iroko         | 420         | 81.4144                              | 78.7069                               | 78.81454                               |
| Iroko         | 425         | 79.42672                             | 78.90097                              | 79.03351                               |
| Iroko         | 430         | 80.91033                             | 79.50364                              | 79.63145                               |
| Iroko         | 435         | 82.92045                             | 79.51982                              | 79.68619                               |
| Iroko         | 440         | 83.83906                             | 79.71375                              | 79.90515                               |
| Iroko         | 445         | 84.42069                             | 80.07586                              | 80.27992                               |
| Iroko         | 450         | 85.05003                             | 80.96092                              | 81.13051                               |
| Iroko         | 455         | 85.20813                             | 81.48633                              | 81.64845                               |
| Iroko         | 460         | 85.68934                             | 81.94796                              | 82.10743                               |
| Iroko         | 465         | 86.59322                             | 82.52085                              | 82.66326                               |
| Iroko         | 470         | 88.88839                             | 82.94261                              | 83.08435                               |
| Iroko         | 475         | 89.31299                             | 83.71887                              | 83.81282                               |
| Iroko         | 480         | 89.14919                             | 84.22634                              | 84.30549                               |
| Iroko         | 485         | 89.21371                             | 84.61188                              | 84.69289                               |
| Iroko         | 490         | 92.09537                             | 85.63491                              | 85.62349                               |
| Iroko         | 495         | 93.84902                             | 86.47943                              | 86.39829                               |
| Iroko         | 500         | 93.35605                             | 87.47043                              | 87.2952                                |
| Iroko         | 505         | 95.70536                             | 88.65993                              | 88.36055                               |
| Iroko         | 510         | 96.96561                             | 89.2467                               | 88.9248                                |
| Iroko         | 515         | 95.48165                             | 89.74258                              | 89.41747                               |
| Iroko         | 520         | 96.63084                             | 90.80766                              | 90.40702                               |
| Iroko         | 525         | 99.10143                             | 91.88843                              | 91.43868                               |
| Iroko         | 530         | 101.0147                             | 92.77532                              | 92.33559                               |
| Iroko         | 535         | 100.9444                             | 93.38663                              | 93.01354                               |
| Iroko         | 540         | 103.7526                             | 93.99756                              | 93.72938                               |
| Iroko         | 545         | 100.3729                             | 94.90394                              | 94.82421                               |
| Iroko         | 550         | 105.2885                             | 95.7717                               | 96.02009                               |
| Iroko         | 555         | 107.0468                             | 96.18272                              | 96.76541                               |
| Iroko         | 560         | 107.3434                             | 96.88459                              | 98.07077                               |
| Iroko         | 565         | 110.7909                             | 97.70788                              | 99.80986                               |
| Iroko         | 570         | 111.0234                             | 98.33032                              | 101.2415                               |
| Iroko         | 575         | 114.1361                             | 99.01152                              | 102.6395                               |
| Iroko         | 580         | 114.411                              | 99.81859                              | 104.0291                               |
| Iroko         | 585         | 117.5478                             | 100.7464                              | 105.3892                               |
| Iroko         | 590         | 116.248                              | 101.9315                              | 106.9009                               |
| Iroko         | 595         | 120.0291                             | 103.1093                              | 108.2737                               |
| Iroko         | 600         | 123.1551                             | 104.9671                              | 110.257                                |

**Table S2.** Predicted and true values of HRR for Iroko, Pine and Paulownia wood (continuation).

| Sample<br>(-) | Time<br>(s) | HRR CC Ref.<br>(kW m <sup>-2</sup> ) | HRR NN_Model<br>(kW m <sup>-2</sup> ) | HRR nct_Model<br>(kW m <sup>-2</sup> ) |
|---------------|-------------|--------------------------------------|---------------------------------------|----------------------------------------|
| Iroko         | 605         | 125.1464                             | 106.5524                              | 111.8655                               |
| Iroko         | 610         | 127.0323                             | 108.606                               | 113.8531                               |
| Iroko         | 615         | 128.3051                             | 110.7908                              | 115.8869                               |
| Iroko         | 620         | 127.7359                             | 112.8121                              | 117.7144                               |
| Iroko         | 625         | 131.9881                             | 114.8934                              | 119.5461                               |
| Iroko         | 630         | 133.5731                             | 117.7408                              | 121.9632                               |
| Iroko         | 635         | 137.7962                             | 119.3763                              | 123.3443                               |
| Iroko         | 640         | 138.4171                             | 121.5477                              | 125.1297                               |
| Iroko         | 645         | 142.6928                             | 123.6866                              | 126.8604                               |
| Iroko         | 650         | 146.8579                             | 126.2887                              | 128.9195                               |
| Iroko         | 655         | 148.724                              | 129.0199                              | 131.046                                |
| Iroko         | 660         | 157.2752                             | 132.9623                              | 134.0441                               |
| Iroko         | 665         | 158.487                              | 136.505                               | 136.718                                |
| Iroko         | 670         | 160.5248                             | 140.0917                              | 139.4129                               |
| Iroko         | 675         | 162.7029                             | 143.4298                              | 141.9268                               |
| Iroko         | 680         | 162.7955                             | 145.6096                              | 143.5985                               |
| Iroko         | 685         | 168.6787                             | 148.4903                              | 145.7966                               |
| Iroko         | 690         | 173.0794                             | 151.6727                              | 148.2389                               |
| Iroko         | 695         | 175.5092                             | 155.2647                              | 151.0223                               |
| Iroko         | 700         | 177.9071                             | 158.4143                              | 153.5151                               |
| Iroko         | 705         | 179.1554                             | 162.2279                              | 156.5848                               |
| Iroko         | 710         | 186.0567                             | 165.3801                              | 159.2166                               |
| Iroko         | 715         | 188.1102                             | 168.8142                              | 162.1894                               |
| Iroko         | 720         | 197.0682                             | 172.1186                              | 165.2255                               |
| Iroko         | 725         | 197.0956                             | 175.791                               | 168.9184                               |
| Iroko         | 730         | 204.2967                             | 178.6002                              | 172.2786                               |
| Iroko         | 735         | 207.5448                             | 180.6117                              | 175.4494                               |
| Iroko         | 740         | 211.0429                             | 181.8519                              | 178.6581                               |
| Iroko         | 745         | 213.9319                             | 182.1167                              | 181.4878                               |
| Iroko         | 750         | 211.3906                             | 181.6973                              | 183.3869                               |
| Iroko         | 755         | 209.9921                             | 180.9597                              | 184.9744                               |
| Iroko         | 760         | 214.984                              | 179.9268                              | 186.6082                               |
| Iroko         | 765         | 219.6931                             | 178.6242                              | 188.2588                               |
| Iroko         | 770         | 226.2753                             | 176.7671                              | 190.6338                               |
| Iroko         | 775         | 228.456                              | 174.9667                              | 192.6592                               |
| Iroko         | 780         | 230.3512                             | 173.1786                              | 195.1394                               |
| Iroko         | 785         | 230.1252                             | 171.8271                              | 196.7521                               |
| Iroko         | 790         | 237.7279                             | 170.6547                              | 198.1375                               |
| Iroko         | 795         | 234.2473                             | 169.9113                              | 199.885                                |
| Iroko         | 800         | 230.7273                             | 168.3996                              | 200.0155                               |

**Table S2.** Predicted and true values of HRR for Iroko, Pine and Paulownia wood (continuation).

| Sample<br>(-) | Time<br>(s) | HRR CC Ref.<br>(kW m <sup>-2</sup> ) | HRR NN_Model<br>(kW m <sup>-2</sup> ) | HRR nct_Model<br>(kW m <sup>-2</sup> ) |
|---------------|-------------|--------------------------------------|---------------------------------------|----------------------------------------|
| Iroko         | 805         | 218.7219                             | 166.4348                              | 198.6512                               |
| Iroko         | 810         | 205.9678                             | 165.7337                              | 196.0826                               |
| Iroko         | 815         | 194.9699                             | 168.3749                              | 191.8338                               |
| Iroko         | 820         | 178.7208                             | 173.5739                              | 185.8671                               |
| Iroko         | 825         | 158.7674                             | 175.9669                              | 178.1696                               |
| Iroko         | 830         | 138.088                              | 172.3211                              | 169.7437                               |
| Iroko         | 835         | 125.2673                             | 164.313                               | 161.0441                               |
| Iroko         | 840         | 115.2019                             | 154.7264                              | 152.9929                               |
| Iroko         | 845         | 109.8498                             | 145.3926                              | 145.9692                               |
| Iroko         | 850         | 105.9287                             | 137.5657                              | 140.2635                               |
| Iroko         | 855         | 104.1366                             | 129.5735                              | 134.2252                               |
| Iroko         | 860         | 98.28658                             | 123.5066                              | 129.1974                               |
| Iroko         | 865         | 95.04936                             | 118.4236                              | 124.4812                               |
| Iroko         | 870         | 87.42478                             | 113.7887                              | 119.9377                               |
| Iroko         | 875         | 84.8966                              | 108.8357                              | 115.4658                               |
| Iroko         | 880         | 82.904                               | 104.1526                              | 111.8234                               |
| Iroko         | 885         | 79.60448                             | 99.36448                              | 108.3916                               |
| Iroko         | 890         | 77.34141                             | 94.7348                               | 104.9976                               |
| Iroko         | 895         | 75.59308                             | 90.59496                              | 101.6416                               |
| Iroko         | 900         | 75.35051                             | 87.42081                              | 98.74872                               |
| Iroko         | 905         | 73.13724                             | 84.65852                              | 95.91903                               |
| Iroko         | 910         | 70.6302                              | 82.61579                              | 93.56095                               |
| Iroko         | 915         | 70.37345                             | 80.7974                               | 91.07234                               |
| Iroko         | 920         | 70.32116                             | 79.34642                              | 88.43634                               |
| Iroko         | 925         | 67.95565                             | 78.47809                              | 86.13722                               |
| Iroko         | 930         | 65.16971                             | 77.89295                              | 83.95178                               |
| Iroko         | 935         | 64.55502                             | 77.38262                              | 81.99795                               |
| Iroko         | 940         | 63.76041                             | 76.86629                              | 80.5073                                |
| Iroko         | 945         | 62.79434                             | 76.17777                              | 78.97455                               |
| Iroko         | 950         | 61.37223                             | 75.28058                              | 77.43759                               |
| Iroko         | 955         | 60.21608                             | 74.23769                              | 76.0059                                |
| Iroko         | 960         | 61.39151                             | 72.68308                              | 74.17418                               |
| Iroko         | 965         | 58.28261                             | 71.12864                              | 72.59511                               |
| Iroko         | 970         | 59.01886                             | 69.34742                              | 70.92761                               |
| Iroko         | 975         | 57.11932                             | 68.03802                              | 69.80753                               |
| Iroko         | 980         | 56.22929                             | 66.63528                              | 68.6327                                |
| Iroko         | 985         | 55.56634                             | 65.58908                              | 67.80737                               |
| Iroko         | 990         | 55.46935                             | 64.62905                              | 67.06626                               |
| Iroko         | 995         | 55.28903                             | 63.20201                              | 65.89985                               |
| Iroko         | 1000        | 53.66585                             | 62.33195                              | 65.23875                               |

**Table S2.** Predicted and true values of HRR for Iroko, Pine and Paulownia wood (continuation).

| Sample<br>(-) | Time<br>(s) | HRR CC Ref.<br>(kW m <sup>-2</sup> ) | HRR NN_Model<br>(kW m <sup>-2</sup> ) | HRR nct_Model<br>(kW m <sup>-2</sup> ) |
|---------------|-------------|--------------------------------------|---------------------------------------|----------------------------------------|
| Iroko         | 1005        | 53.42741                             | 60.96576                              | 64.11866                               |
| Iroko         | 1010        | 54.07712                             | 59.82306                              | 63.19228                               |
| Iroko         | 1015        | 52.60507                             | 58.69406                              | 62.26589                               |
| Iroko         | 1020        | 50.93635                             | 57.62594                              | 61.38161                               |
| Iroko         | 1025        | 51.16032                             | 56.54287                              | 60.46785                               |
| Iroko         | 1030        | 52.02562                             | 55.79214                              | 59.85307                               |
| Iroko         | 1035        | 51.99873                             | 54.94391                              | 59.13301                               |
| Iroko         | 1040        | 52.37489                             | 54.37145                              | 58.66561                               |
| Iroko         | 1045        | 52.55135                             | 53.92578                              | 58.3119                                |
| Iroko         | 1050        | 50.84625                             | 53.11442                              | 57.59184                               |
| Iroko         | 1055        | 50.8581                              | 52.33387                              | 56.88863                               |
| Iroko         | 1060        | 50.37976                             | 51.44417                              | 56.0633                                |
| Iroko         | 1065        | 49.16669                             | 50.43567                              | 55.10323                               |
| Iroko         | 1070        | 48.40544                             | 49.73727                              | 54.44212                               |
| Iroko         | 1075        | 49.36521                             | 49.20576                              | 53.94103                               |
| Iroko         | 1080        | 49.2228                              | 48.67418                              | 53.43152                               |
| Iroko         | 1085        | 48.5807                              | 48.13012                              | 52.90095                               |
| Iroko         | 1090        | 48.89941                             | 47.48065                              | 52.25248                               |
| Iroko         | 1095        | 48.44299                             | 47.22947                              | 52.01246                               |
| Iroko         | 1100        | 48.47961                             | 46.7665                               | 51.54506                               |
| Iroko         | 1105        | 48.49376                             | 46.24581                              | 51.01028                               |
| Iroko         | 1110        | 48.08041                             | 45.6204                               | 50.35759                               |
| Iroko         | 1115        | 47.61571                             | 45.36531                              | 50.09231                               |
| Iroko         | 1120        | 47.49313                             | 45.0945                               | 49.80597                               |
| Iroko         | 1125        | 46.45895                             | 44.58791                              | 49.26277                               |
| Iroko         | 1130        | 46.55017                             | 43.9966                               | 48.62272                               |
| Iroko         | 1135        | 45.5189                              | 43.32142                              | 47.88582                               |
| Iroko         | 1140        | 46.25103                             | 43.14161                              | 47.67949                               |
| Iroko         | 1145        | 45.43181                             | 42.674                                | 47.15735                               |
| Iroko         | 1150        | 44.39036                             | 42.46216                              | 46.90891                               |
| Iroko         | 1155        | 44.37773                             | 42.28058                              | 46.68994                               |
| Iroko         | 1160        | 45.26192                             | 42.06733                              | 46.43308                               |
| Iroko         | 1165        | 44.37437                             | 41.81088                              | 46.12569                               |
| Iroko         | 1170        | 44.08011                             | 41.49981                              | 45.75513                               |
| Iroko         | 1175        | 44.49959                             | 41.21895                              | 45.41405                               |
| Iroko         | 1180        | 43.13338                             | 41.122                                | 45.27088                               |
| Iroko         | 1185        | 43.18354                             | 41.03954                              | 45.14035                               |
| Iroko         | 1190        | 43.36952                             | 40.57928                              | 44.59294                               |
| Iroko         | 1195        | 42.54936                             | 40.31822                              | 44.26028                               |
| Iroko         | 1200        | 43.4456                              | 39.75015                              | 43.58654                               |

**Table S2.** Predicted and true values of HRR for Iroko, Pine and Paulownia wood (continuation).

| Sample<br>(-) | Time<br>(s) | HRR CC Ref.<br>(kW m <sup>-2</sup> ) | HRR NN_Model<br>(kW m <sup>-2</sup> ) | HRR nct_Model<br>(kW m <sup>-2</sup> ) |
|---------------|-------------|--------------------------------------|---------------------------------------|----------------------------------------|
| Iroko         | 1205        | 43.70117                             | 39.23226                              | 42.96334                               |
| Iroko         | 1210        | 44.20206                             | 39.05293                              | 42.71069                               |
| Iroko         | 1215        | 44.28375                             | 39.17727                              | 42.79069                               |
| Iroko         | 1220        | 43.28265                             | 38.74425                              | 42.2517                                |
| Iroko         | 1225        | 41.91691                             | 38.26565                              | 41.65797                               |
| Iroko         | 1230        | 41.75101                             | 38.12744                              | 41.43901                               |
| Iroko         | 1235        | 41.99784                             | 38.01822                              | 41.24952                               |
| Iroko         | 1240        | 43.08104                             | 37.9644                               | 41.11898                               |
| Iroko         | 1245        | 42.55939                             | 37.47465                              | 40.49999                               |
| Iroko         | 1250        | 43.68396                             | 37.51568                              | 40.47051                               |
| Iroko         | 1255        | 41.55704                             | 37.54008                              | 40.41998                               |
| Iroko         | 1260        | 40.83025                             | 37.68767                              | 40.5042                                |
| Iroko         | 1265        | 39.41447                             | 37.45486                              | 40.16312                               |
| Iroko         | 1270        | 39.69965                             | 37.43174                              | 40.05364                               |
| Iroko         | 1275        | 40.56143                             | 37.30425                              | 39.82625                               |
| Iroko         | 1280        | 40.51013                             | 37.28752                              | 39.72098                               |
| Iroko         | 1285        | 41.41785                             | 37.03064                              | 39.34621                               |
| Iroko         | 1290        | 42.05586                             | 36.72695                              | 38.91671                               |
| Iroko         | 1295        | 40.73669                             | 36.54847                              | 38.62616                               |
| Iroko         | 1300        | 40.52467                             | 36.68401                              | 38.68932                               |
| Iroko         | 1305        | 39.57457                             | 36.59207                              | 38.49562                               |
| Iroko         | 1310        | 39.36829                             | 36.29631                              | 38.07032                               |
| Iroko         | 1315        | 39.35465                             | 36.13883                              | 37.80083                               |
| Iroko         | 1320        | 40.98797                             | 36.20618                              | 37.7882                                |
| Iroko         | 1325        | 41.08392                             | 36.04477                              | 37.51449                               |
| Iroko         | 1330        | 40.33871                             | 35.98226                              | 37.35448                               |
| Iroko         | 1335        | 40.30696                             | 36.11998                              | 37.42606                               |
| Iroko         | 1340        | 38.84422                             | 36.21607                              | 37.45133                               |
| Iroko         | 1345        | 39.66022                             | 36.12422                              | 37.26184                               |
| Iroko         | 1350        | 40.59349                             | 36.17693                              | 37.24079                               |
| Iroko         | 1355        | 41.68733                             | 36.19872                              | 37.18605                               |
| Iroko         | 1360        | 41.0207                              | 36.21503                              | 37.12709                               |
| Iroko         | 1365        | 40.65327                             | 36.17158                              | 37.00077                               |
| Iroko         | 1370        | 40.15863                             | 35.97562                              | 36.69759                               |
| Iroko         | 1375        | 39.57085                             | 35.7301                               | 36.33545                               |
| Iroko         | 1380        | 40.58401                             | 35.79311                              | 36.33966                               |
| Iroko         | 1385        | 40.25796                             | 35.80434                              | 36.28492                               |
| Iroko         | 1390        | 40.53163                             | 35.63066                              | 36.01122                               |
| Iroko         | 1395        | 39.61576                             | 35.55464                              | 35.85542                               |
| Iroko         | 1400        | 39.55051                             | 35.51561                              | 35.74593                               |

**Table S2.** Predicted and true values of HRR for Iroko, Pine and Paulownia wood (continuation).

| Sample<br>(-) | Time<br>(s) | HRR CC Ref.<br>(kW m <sup>-2</sup> ) | HRR NN_Model<br>(kW m <sup>-2</sup> ) | HRR nct_Model<br>(kW m <sup>-2</sup> ) |
|---------------|-------------|--------------------------------------|---------------------------------------|----------------------------------------|
| Iroko         | 1405        | 39.97354                             | 35.31993                              | 35.44696                               |
| Iroko         | 1410        | 39.78864                             | 35.27525                              | 35.33327                               |
| Iroko         | 1415        | 40.54694                             | 35.00884                              | 34.94587                               |
| Iroko         | 1420        | 40.15604                             | 35.10757                              | 35.01325                               |
| Iroko         | 1425        | 39.72805                             | 34.9155                               | 34.71849                               |
| Iroko         | 1430        | 39.85057                             | 34.97033                              | 34.73533                               |
| Iroko         | 1435        | 38.84129                             | 34.89391                              | 34.58795                               |
| Iroko         | 1440        | 39.00243                             | 34.80704                              | 34.42794                               |
| Iroko         | 1445        | 39.84012                             | 34.80483                              | 34.37741                               |
| Iroko         | 1450        | 39.94378                             | 34.6                                  | 34.0658                                |
| Iroko         | 1455        | 40.43939                             | 34.78384                              | 34.2595                                |
| Iroko         | 1460        | 40.41046                             | 34.86246                              | 34.31845                               |
| Iroko         | 1465        | 38.38364                             | 35.18731                              | 34.69743                               |
| Iroko         | 1470        | 37.68729                             | 35.24997                              | 34.73954                               |
| Iroko         | 1475        | 38.45175                             | 35.21688                              | 34.65953                               |
| Iroko         | 1480        | 36.53251                             | 35.1541                               | 34.54163                               |
| Iroko         | 1485        | 38.24943                             | 34.84183                              | 34.09528                               |
| Iroko         | 1490        | 38.41204                             | 35.0154                               | 34.28898                               |
| Iroko         | 1495        | 38.55554                             | 34.82597                              | 34.00264                               |
| Iroko         | 1500        | 39.01697                             | 34.76078                              | 33.88053                               |
| Iroko         | 1505        | 39.97964                             | 34.64603                              | 33.69104                               |
| Iroko         | 1510        | 38.35857                             | 34.60314                              | 33.5984                                |
| Iroko         | 1515        | 36.65088                             | 34.44401                              | 33.34575                               |
| Iroko         | 1520        | 37.08321                             | 34.23274                              | 33.0173                                |
| Iroko         | 1525        | 38.32857                             | 34.132                                | 32.84045                               |
| Iroko         | 1530        | 38.1093                              | 34.34779                              | 33.10994                               |
| Iroko         | 1535        | 37.237                               | 34.44647                              | 33.21521                               |
| Iroko         | 1540        | 37.73136                             | 34.58974                              | 33.38365                               |
| Iroko         | 1545        | 38.22701                             | 34.69346                              | 33.49734                               |
| Iroko         | 1550        | 37.8892                              | 34.83603                              | 33.66577                               |
| Iroko         | 1555        | 38.94369                             | 34.70705                              | 33.45523                               |
| Iroko         | 1560        | 38.352                               | 34.65103                              | 33.34575                               |
| Iroko         | 1565        | 38.31715                             | 34.5601                               | 33.18574                               |
| Iroko         | 1570        | 37.28127                             | 34.57284                              | 33.1731                                |
| Iroko         | 1575        | 38.66804                             | 34.66176                              | 33.26995                               |
| Iroko         | 1580        | 39.12127                             | 34.59211                              | 33.13942                               |
| Iroko         | 1585        | 38.90658                             | 34.47408                              | 32.93729                               |
| Iroko         | 1590        | 37.83413                             | 34.58791                              | 33.07204                               |
| Iroko         | 1595        | 37.66226                             | 34.51682                              | 32.93729                               |
| Iroko         | 1600        | 37.94681                             | 34.53231                              | 32.92887                               |



**Table S2.** Predicted and true values of HRR for Iroko, Pine and Paulownia wood (continuation).

| Sample<br>(-) | Time<br>(s) | HRR CC Ref.<br>(kW m <sup>-2</sup> ) | HRR NN_Model<br>(kW m <sup>-2</sup> ) | HRR nct_Model<br>(kW m <sup>-2</sup> ) |
|---------------|-------------|--------------------------------------|---------------------------------------|----------------------------------------|
| Iroko         | 1605        | 38.80566                             | 34.42827                              | 32.7436                                |
| Iroko         | 1610        | 38.48322                             | 34.37916                              | 32.63832                               |
| Iroko         | 1615        | 39.80245                             | 34.13857                              | 32.2425                                |
| Iroko         | 1620        | 40.22564                             | 34.06444                              | 32.09512                               |
| Iroko         | 1625        | 38.78169                             | 34.02133                              | 31.99406                               |
| Iroko         | 1630        | 36.64584                             | 33.93267                              | 31.82142                               |
| Iroko         | 1635        | 37.39156                             | 33.93946                              | 31.79615                               |
| Iroko         | 1640        | 36.61485                             | 34.03794                              | 31.91406                               |
| Iroko         | 1645        | 37.45145                             | 33.93989                              | 31.72457                               |
| Iroko         | 1650        | 36.95119                             | 33.99771                              | 31.77931                               |
| Iroko         | 1655        | 36.33231                             | 34.20272                              | 32.06565                               |
| Iroko         | 1660        | 37.52564                             | 34.21976                              | 32.05723                               |
| Iroko         | 1665        | 38.62555                             | 34.24216                              | 32.05723                               |
| Iroko         | 1670        | 38.15552                             | 33.97352                              | 31.59403                               |
| Iroko         | 1675        | 38.57647                             | 33.95486                              | 31.52666                               |
| Iroko         | 1680        | 37.37541                             | 34.01474                              | 31.58561                               |
| Iroko         | 1685        | 38.88194                             | 34.10314                              | 31.69088                               |
| Iroko         | 1690        | 39.0852                              | 34.15999                              | 31.74562                               |
| Iroko         | 1695        | 38.85758                             | 34.13348                              | 31.66562                               |
| Iroko         | 1700        | 36.68255                             | 34.20303                              | 31.74141                               |
| Iroko         | 1705        | 36.43547                             | 34.31119                              | 31.88037                               |
| Iroko         | 1710        | 36.46323                             | 34.21246                              | 31.68246                               |
| Iroko         | 1715        | 38.00501                             | 34.27626                              | 31.74983                               |
| Iroko         | 1720        | 36.62461                             | 34.42715                              | 31.96038                               |
| Iroko         | 1725        | 36.91101                             | 34.27795                              | 31.67825                               |
| Iroko         | 1730        | 35.52839                             | 34.37676                              | 31.80458                               |
| Iroko         | 1735        | 34.47592                             | 34.41671                              | 31.83405                               |
| Iroko         | 1740        | 33.57686                             | 34.21927                              | 31.46771                               |
| Iroko         | 1745        | 35.35574                             | 34.11181                              | 31.24874                               |
| Iroko         | 1750        | 36.08518                             | 34.18444                              | 31.33296                               |
| Iroko         | 1755        | 37.84802                             | 34.09778                              | 31.14768                               |
| Iroko         | 1760        | 37.41548                             | 34.18968                              | 31.26559                               |
| Iroko         | 1765        | 37.15015                             | 34.0494                               | 30.98767                               |
| Iroko         | 1770        | 36.95447                             | 33.95187                              | 30.78134                               |
| Iroko         | 1775        | 36.53423                             | 34.0307                               | 30.87819                               |
| Iroko         | 1780        | 36.33657                             | 34.04564                              | 30.86555                               |
| Iroko         | 1785        | 36.65557                             | 33.82237                              | 30.44026                               |
| Iroko         | 1790        | 37.39743                             | 33.81081                              | 30.38131                               |
| Iroko         | 1795        | 37.17406                             | 33.78459                              | 30.29709                               |
| Iroko         | 1800        | 36.71644                             | 34.17759                              | 30.94556                               |

**Table S2.** Predicted and true values of HRR for Iroko, Pine and Paulownia wood (continuation).

| Sample<br>(-) | Time<br>(s) | HRR CC Ref.<br>(kW m <sup>-2</sup> ) | HRR NN_Model<br>(kW m <sup>-2</sup> ) | HRR nct_Model<br>(kW m <sup>-2</sup> ) |
|---------------|-------------|--------------------------------------|---------------------------------------|----------------------------------------|
| Pine          | 0           | 3.966704                             | 0                                     | 0                                      |
| Pine          | 5           | 2.213278                             | 0                                     | 0                                      |
| Pine          | 10          | 1.868233                             | 0                                     | 0                                      |
| Pine          | 15          | 27.28802                             | 0                                     | 0                                      |
| Pine          | 20          | 95.54588                             | 155.1449179                           | 27.53476991                            |
| Pine          | 25          | 156.3004                             | 161.7108282                           | 44.28554445                            |
| Pine          | 30          | 180.7705                             | 148.8154338                           | 58.33716201                            |
| Pine          | 35          | 189.1538                             | 143.5949745                           | 70.11912962                            |
| Pine          | 40          | 184.0419                             | 140.2486861                           | 77.88815401                            |
| Pine          | 45          | 179.594                              | 136.9700287                           | 82.73905704                            |
| Pine          | 50          | 172.4812                             | 134.2601508                           | 86.53303589                            |
| Pine          | 55          | 164.0904                             | 131.6015991                           | 89.2658797                             |
| Pine          | 60          | 159.319                              | 128.4927011                           | 90.79441946                            |
| Pine          | 65          | 149.3305                             | 124.6215053                           | 91.0344381                             |
| Pine          | 70          | 144.5367                             | 120.6801106                           | 90.73546751                            |
| Pine          | 75          | 142.2074                             | 117.6966407                           | 90.9081125                             |
| Pine          | 80          | 136.5026                             | 114.0051779                           | 90.06594183                            |
| Pine          | 85          | 133.448                              | 111.2290506                           | 89.75012783                            |
| Pine          | 90          | 133.3104                             | 108.6003124                           | 89.29114482                            |
| Pine          | 95          | 125.467                              | 106.1275445                           | 88.73110133                            |
| Pine          | 100         | 121.0123                             | 103.4555212                           | 87.77102677                            |
| Pine          | 105         | 117.5215                             | 100.0009042                           | 85.89298618                            |
| Pine          | 110         | 115.6815                             | 97.36806944                           | 84.61288677                            |
| Pine          | 115         | 112.5955                             | 95.35861103                           | 83.77071611                            |
| Pine          | 120         | 111.8026                             | 94.42188193                           | 83.80019208                            |
| Pine          | 125         | 110.5292                             | 92.63045407                           | 82.92854544                            |
| Pine          | 130         | 110.7003                             | 90.73574378                           | 81.87162126                            |
| Pine          | 135         | 109.5668                             | 89.54339577                           | 81.38316227                            |
| Pine          | 140         | 108.9341                             | 88.9988113                            | 81.4168491                             |
| Pine          | 145         | 106.5107                             | 88.06459814                           | 81.03366144                            |
| Pine          | 150         | 106.0107                             | 86.81313651                           | 80.31360552                            |
| Pine          | 155         | 104.3595                             | 85.27816311                           | 79.30300073                            |
| Pine          | 160         | 106.3822                             | 84.84300417                           | 79.23983793                            |
| Pine          | 165         | 106.192                              | 84.92687351                           | 79.60197131                            |
| Pine          | 170         | 109.0315                             | 84.2640827                            | 79.27352475                            |
| Pine          | 175         | 104.6713                             | 83.59255277                           | 78.91560222                            |
| Pine          | 180         | 101.9119                             | 83.71541972                           | 79.23141622                            |
| Pine          | 185         | 99.07124                             | 82.89729776                           | 78.70927041                            |
| Pine          | 190         | 96.54634                             | 81.9125169                            | 78.03553387                            |
| Pine          | 195         | 96.23149                             | 81.82887227                           | 78.12396179                            |
| Pine          | 200         | 97.03269                             | 81.45716985                           | 77.95552766                            |

**Table S2.** Predicted and true values of HRR for Iroko, Pine and Paulownia wood (continuation).

| Sample<br>(-) | Time<br>(s) | HRR CC Ref.<br>(kW m <sup>-2</sup> ) | HRR NN_Model<br>(kW m <sup>-2</sup> ) | HRR nct_Model<br>(kW m <sup>-2</sup> ) |
|---------------|-------------|--------------------------------------|---------------------------------------|----------------------------------------|
| Pine          | 205         | 97.96924                             | 81.29972603                           | 77.95973851                            |
| Pine          | 210         | 98.70122                             | 80.88209411                           | 77.73656329                            |
| Pine          | 215         | 98.40776                             | 81.43382931                           | 78.3218719                             |
| Pine          | 220         | 100.7221                             | 81.39380714                           | 78.40187811                            |
| Pine          | 225         | 99.35995                             | 81.46584897                           | 78.57031225                            |
| Pine          | 230         | 98.74127                             | 80.83385912                           | 78.14501606                            |
| Pine          | 235         | 98.19157                             | 81.01757287                           | 78.39766726                            |
| Pine          | 240         | 97.73575                             | 81.24148279                           | 78.67979443                            |
| Pine          | 245         | 100.4077                             | 82.53151248                           | 79.85041166                            |
| Pine          | 250         | 102.3942                             | 83.23829384                           | 80.5325699                             |
| Pine          | 255         | 104.3898                             | 82.96827639                           | 80.38940088                            |
| Pine          | 260         | 101.822                              | 83.91536112                           | 81.26946923                            |
| Pine          | 265         | 102.5642                             | 85.0083165                            | 82.27586318                            |
| Pine          | 270         | 104.7775                             | 86.06682954                           | 83.256992                              |
| Pine          | 275         | 107.689                              | 88.05958268                           | 85.05502637                            |
| Pine          | 280         | 109.8413                             | 88.2081036                            | 85.25293648                            |
| Pine          | 285         | 112.336                              | 89.42448549                           | 86.38565602                            |
| Pine          | 290         | 109.6305                             | 90.08694328                           | 87.03412744                            |
| Pine          | 295         | 112.714                              | 91.97471886                           | 88.77320986                            |
| Pine          | 300         | 113.542                              | 93.39279029                           | 90.10383951                            |
| Pine          | 305         | 111.7823                             | 94.55176389                           | 91.20708308                            |
| Pine          | 310         | 117.3531                             | 96.07301422                           | 92.64298407                            |
| Pine          | 315         | 113.9764                             | 97.44582491                           | 93.95255945                            |
| Pine          | 320         | 114.794                              | 97.41852756                           | 93.99045713                            |
| Pine          | 325         | 113.1278                             | 97.22583535                           | 93.87676409                            |
| Pine          | 330         | 115.7536                             | 97.45172869                           | 94.14625871                            |
| Pine          | 335         | 118.7569                             | 98.1138816                            | 94.81999524                            |
| Pine          | 340         | 115.945                              | 98.76824728                           | 95.49373177                            |
| Pine          | 345         | 117.1547                             | 99.71949935                           | 96.45801718                            |
| Pine          | 350         | 116.79                               | 100.8760208                           | 97.64547782                            |
| Pine          | 355         | 116.6794                             | 101.5609416                           | 98.40764228                            |
| Pine          | 360         | 116.8647                             | 101.5281236                           | 98.46659422                            |
| Pine          | 365         | 116.6325                             | 101.4566125                           | 98.48764849                            |
| Pine          | 370         | 115.3576                             | 101.8637913                           | 99.0097943                             |
| Pine          | 375         | 115.7362                             | 102.3243623                           | 99.61615718                            |
| Pine          | 380         | 117.7387                             | 102.7328963                           | 100.2014658                            |
| Pine          | 385         | 119.3084                             | 102.9873204                           | 100.6436054                            |
| Pine          | 390         | 122.3342                             | 103.2384569                           | 101.115221                             |
| Pine          | 395         | 122.9727                             | 103.4900195                           | 101.6289451                            |
| Pine          | 400         | 122.7028                             | 104.0417466                           | 102.6437607                            |

**Table S2.** Predicted and true values of HRR for Iroko, Pine and Paulownia wood (continuation).

| Sample<br>(-) | Time<br>(s) | HRR CC Ref.<br>(kW m <sup>-2</sup> ) | HRR NN_Model<br>(kW m <sup>-2</sup> ) | HRR nct_Model<br>(kW m <sup>-2</sup> ) |
|---------------|-------------|--------------------------------------|---------------------------------------|----------------------------------------|
| Pine          | 405         | 122.0666                             | 104.3936905                           | 103.4775097                            |
| Pine          | 410         | 123.6839                             | 104.8628724                           | 104.6228618                            |
| Pine          | 415         | 125.0438                             | 104.5596659                           | 104.4081083                            |
| Pine          | 420         | 126.3973                             | 104.5662936                           | 104.7660308                            |
| Pine          | 425         | 129.9015                             | 104.673151                            | 105.3176526                            |
| Pine          | 430         | 127.1921                             | 105.0201005                           | 106.2903597                            |
| Pine          | 435         | 130.9467                             | 105.2108405                           | 106.9219877                            |
| Pine          | 440         | 133.542                              | 106.1598076                           | 108.5936965                            |
| Pine          | 445         | 130.6929                             | 106.9728565                           | 109.8148439                            |
| Pine          | 450         | 131.6348                             | 106.942148                            | 109.9369587                            |
| Pine          | 455         | 133.2864                             | 106.6148892                           | 109.7053618                            |
| Pine          | 460         | 135.6052                             | 107.4750947                           | 110.8086053                            |
| Pine          | 465         | 134.8627                             | 108.3196631                           | 111.7981559                            |
| Pine          | 470         | 135.0961                             | 109.0996646                           | 112.6613808                            |
| Pine          | 475         | 138.5133                             | 108.4004999                           | 112.080283                             |
| Pine          | 480         | 139.7684                             | 109.485522                            | 113.2045809                            |
| Pine          | 485         | 140.8497                             | 111.2243378                           | 114.8552354                            |
| Pine          | 490         | 141.048                              | 112.6271807                           | 116.1437565                            |
| Pine          | 495         | 142.5162                             | 113.8514917                           | 117.2470001                            |
| Pine          | 500         | 146.4237                             | 115.5152967                           | 118.6871119                            |
| Pine          | 505         | 147.8858                             | 117.2690907                           | 120.1693323                            |
| Pine          | 510         | 148.6512                             | 118.7610175                           | 121.4199557                            |
| Pine          | 515         | 150.7934                             | 120.3274718                           | 122.7126877                            |
| Pine          | 520         | 152.9537                             | 122.3366472                           | 124.3296554                            |
| Pine          | 525         | 154.2394                             | 123.094938                            | 124.9781268                            |
| Pine          | 530         | 155.5165                             | 124.9943052                           | 126.4856123                            |
| Pine          | 535         | 154.4462                             | 126.286786                            | 127.525693                             |
| Pine          | 540         | 156.1954                             | 126.5867468                           | 127.8204528                            |
| Pine          | 545         | 158.2013                             | 128.2117871                           | 129.1005522                            |
| Pine          | 550         | 161.1494                             | 130.2990815                           | 130.713309                             |
| Pine          | 555         | 160.6697                             | 131.9114362                           | 131.9681433                            |
| Pine          | 560         | 165.0011                             | 133.2303489                           | 133.0040132                            |
| Pine          | 565         | 166.007                              | 134.0266011                           | 133.6566955                            |
| Pine          | 570         | 167.08                               | 135.7970823                           | 135.0168011                            |
| Pine          | 575         | 168.6049                             | 137.8392988                           | 136.570606                             |
| Pine          | 580         | 171.015                              | 139.5995766                           | 137.9180791                            |
| Pine          | 585         | 172.0285                             | 141.599423                            | 139.4381971                            |
| Pine          | 590         | 173.3684                             | 142.6896194                           | 140.301422                             |
| Pine          | 595         | 180.7424                             | 144.6222731                           | 141.7752207                            |
| Pine          | 600         | 176.5262                             | 146.9399702                           | 143.5311465                            |

**Table S2.** Predicted and true values of HRR for Iroko, Pine and Paulownia wood (continuation).

| Sample<br>(-) | Time<br>(s) | HRR CC Ref.<br>(kW m <sup>-2</sup> ) | HRR NN_Model<br>(kW m <sup>-2</sup> ) | HRR nct_Model<br>(kW m <sup>-2</sup> ) |
|---------------|-------------|--------------------------------------|---------------------------------------|----------------------------------------|
| Pine          | 605         | 179.6208                             | 149.6838685                           | 145.6028864                            |
| Pine          | 610         | 185.4618                             | 153.0814659                           | 148.1630852                            |
| Pine          | 615         | 191.2493                             | 157.2915804                           | 151.3422795                            |
| Pine          | 620         | 190.0835                             | 159.5148498                           | 153.0813619                            |
| Pine          | 625         | 189.0787                             | 161.0734644                           | 154.340407                             |
| Pine          | 630         | 197.0974                             | 163.5413975                           | 156.2984538                            |
| Pine          | 635         | 202.6833                             | 166.8238763                           | 158.9133937                            |
| Pine          | 640         | 205.3364                             | 169.7271012                           | 161.2967367                            |
| Pine          | 645         | 209.1891                             | 170.9089373                           | 162.3662935                            |
| Pine          | 650         | 208.5048                             | 173.2604242                           | 164.4211899                            |
| Pine          | 655         | 208.3429                             | 174.7711453                           | 165.8444583                            |
| Pine          | 660         | 209.4795                             | 176.7346399                           | 167.7309206                            |
| Pine          | 665         | 212.0123                             | 177.5848591                           | 168.6909952                            |
| Pine          | 670         | 217.2751                             | 178.869246                            | 170.1184745                            |
| Pine          | 675         | 213.2391                             | 180.019234                            | 171.5122669                            |
| Pine          | 680         | 211.1398                             | 179.3225566                           | 171.0195971                            |
| Pine          | 685         | 214.9791                             | 179.547228                            | 171.4954235                            |
| Pine          | 690         | 208.5194                             | 179.233493                            | 171.4027847                            |
| Pine          | 695         | 202.5463                             | 178.3595877                           | 170.7079939                            |
| Pine          | 700         | 205.1621                             | 177.1884013                           | 169.7142325                            |
| Pine          | 705         | 198.97                               | 175.4247169                           | 168.1562168                            |
| Pine          | 710         | 194.1964                             | 172.0721031                           | 165.1833544                            |
| Pine          | 715         | 186.1785                             | 168.2777533                           | 161.9831058                            |
| Pine          | 720         | 182.0194                             | 163.6936068                           | 158.2607115                            |
| Pine          | 725         | 174.6227                             | 158.9780823                           | 154.5677931                            |
| Pine          | 730         | 164.2918                             | 154.3841194                           | 151.0769957                            |
| Pine          | 735         | 154.2775                             | 148.8200085                           | 146.9419377                            |
| Pine          | 740         | 145.0947                             | 142.3906531                           | 142.255258                             |
| Pine          | 745         | 136.8502                             | 136.6045455                           | 138.0780915                            |
| Pine          | 750         | 127.1473                             | 128.5197744                           | 132.1028906                            |
| Pine          | 755         | 116.5142                             | 121.5361835                           | 126.6119379                            |
| Pine          | 760         | 107.7061                             | 114.4586584                           | 120.3967184                            |
| Pine          | 765         | 94.70236                             | 108.5674562                           | 114.7331206                            |
| Pine          | 770         | 84.40045                             | 101.525869                            | 108.3873647                            |
| Pine          | 775         | 74.90185                             | 94.15206525                           | 102.5258568                            |
| Pine          | 780         | 69.77367                             | 88.61066628                           | 97.65811038                            |
| Pine          | 785         | 66.11808                             | 85.16892183                           | 93.41778108                            |
| Pine          | 790         | 62.14848                             | 83.0953256                            | 89.44273554                            |
| Pine          | 795         | 57.22961                             | 81.27725413                           | 85.44242488                            |
| Pine          | 800         | 57.01636                             | 79.20293795                           | 81.4884336                             |

**Table S2.** Predicted and true values of HRR for Iroko, Pine and Paulownia wood (continuation).

| Sample<br>(-) | Time<br>(s) | HRR CC Ref.<br>(kW m <sup>-2</sup> ) | HRR NN_Model<br>(kW m <sup>-2</sup> ) | HRR nct_Model<br>(kW m <sup>-2</sup> ) |
|---------------|-------------|--------------------------------------|---------------------------------------|----------------------------------------|
| Pine          | 805         | 54.60124                             | 77.33676471                           | 78.15764862                            |
| Pine          | 810         | 51.91307                             | 74.84544929                           | 74.16154881                            |
| Pine          | 815         | 49.43566                             | 73.45700352                           | 72.30035164                            |
| Pine          | 820         | 48.57031                             | 71.62048889                           | 70.14439474                            |
| Pine          | 825         | 45.7982                              | 69.01011701                           | 67.4410269                             |
| Pine          | 830         | 45.19839                             | 66.4793689                            | 65.06610562                            |
| Pine          | 835         | 44.24049                             | 63.83081636                           | 62.71644947                            |
| Pine          | 840         | 44.64881                             | 61.87971071                           | 61.06579496                            |
| Pine          | 845         | 45.315                               | 60.3495652                            | 59.81517152                            |
| Pine          | 850         | 43.54276                             | 58.38337483                           | 58.19399299                            |
| Pine          | 855         | 41.32263                             | 56.80582126                           | 56.92231529                            |
| Pine          | 860         | 42.17047                             | 55.06362807                           | 55.50746857                            |
| Pine          | 865         | 41.22899                             | 53.45487685                           | 54.20631489                            |
| Pine          | 870         | 41.65838                             | 52.09669579                           | 53.11991473                            |
| Pine          | 875         | 40.09018                             | 50.87989525                           | 52.15141847                            |
| Pine          | 880         | 40.04483                             | 49.93538672                           | 51.41872999                            |
| Pine          | 885         | 38.40305                             | 48.04391546                           | 49.81860572                            |
| Pine          | 890         | 41.5139                              | 46.94163878                           | 48.91748311                            |
| Pine          | 895         | 40.14075                             | 46.48975982                           | 48.60587997                            |
| Pine          | 900         | 39.52866                             | 45.64993636                           | 47.92793258                            |
| Pine          | 905         | 38.51093                             | 44.61650762                           | 47.05628594                            |
| Pine          | 910         | 38.64076                             | 43.39737515                           | 45.99094005                            |
| Pine          | 915         | 39.23831                             | 42.39614558                           | 45.11508256                            |
| Pine          | 920         | 39.02523                             | 41.52000826                           | 44.3444964                             |
| Pine          | 925         | 38.95528                             | 41.13084043                           | 44.04131496                            |
| Pine          | 930         | 34.74477                             | 39.51303174                           | 42.50014264                            |
| Pine          | 935         | 34.49608                             | 38.52217063                           | 41.56112235                            |
| Pine          | 940         | 33.52827                             | 38.11647943                           | 41.20741067                            |
| Pine          | 945         | 33.5059                              | 37.17670743                           | 40.28944464                            |
| Pine          | 950         | 33.67267                             | 36.65304194                           | 39.79256395                            |
| Pine          | 955         | 33.35055                             | 36.13417983                           | 39.2914724                             |
| Pine          | 960         | 33.39191                             | 35.92530253                           | 39.11461656                            |
| Pine          | 965         | 31.58311                             | 35.41280382                           | 38.60510331                            |
| Pine          | 970         | 32.39581                             | 34.53288874                           | 37.68292643                            |
| Pine          | 975         | 33.79505                             | 33.68942051                           | 36.78180382                            |
| Pine          | 980         | 34.79262                             | 32.50042756                           | 35.46801758                            |
| Pine          | 985         | 35.04575                             | 32.08995517                           | 35.02166713                            |
| Pine          | 990         | 33.59179                             | 31.99426829                           | 34.93323921                            |
| Pine          | 995         | 35.72597                             | 31.83551251                           | 34.76901593                            |
| Pine          | 1000        | 33.67403                             | 31.15001431                           | 33.98158636                            |

**Table S2.** Predicted and true values of HRR for Iroko, Pine and Paulownia wood (continuation).

| Sample<br>(-) | Time<br>(s) | HRR CC Ref.<br>(kW m <sup>-2</sup> ) | HRR NN_Model<br>(kW m <sup>-2</sup> ) | HRR nct_Model<br>(kW m <sup>-2</sup> ) |
|---------------|-------------|--------------------------------------|---------------------------------------|----------------------------------------|
| Pine          | 1005        | 33.3413                              | 31.02067761                           | 33.8426282                             |
| Pine          | 1010        | 33.97434                             | 31.64193168                           | 34.59216009                            |
| Pine          | 1015        | 32.80183                             | 31.59134678                           | 34.5458407                             |
| Pine          | 1020        | 35.24219                             | 31.0903057                            | 33.96053209                            |
| Pine          | 1025        | 35.06338                             | 30.78218674                           | 33.5983987                             |
| Pine          | 1030        | 35.99084                             | 29.94628843                           | 32.58358305                            |
| Pine          | 1035        | 34.25368                             | 29.68944284                           | 32.26776905                            |
| Pine          | 1040        | 32.26571                             | 29.60803429                           | 32.16670857                            |
| Pine          | 1045        | 33.19806                             | 29.49131697                           | 32.01932871                            |
| Pine          | 1050        | 33.85735                             | 29.30325509                           | 31.77931007                            |
| Pine          | 1055        | 33.97984                             | 29.1742259                            | 31.61087593                            |
| Pine          | 1060        | 32.80091                             | 28.83739548                           | 31.17294719                            |
| Pine          | 1065        | 32.54595                             | 28.8505235                            | 31.18136889                            |
| Pine          | 1070        | 32.87841                             | 28.72160499                           | 31.00451305                            |
| Pine          | 1075        | 32.48248                             | 28.66573893                           | 30.92029599                            |
| Pine          | 1080        | 32.81984                             | 28.42210251                           | 30.58763857                            |
| Pine          | 1085        | 31.62916                             | 28.59646931                           | 30.80239209                            |
| Pine          | 1090        | 32.86077                             | 28.35680863                           | 30.46973468                            |
| Pine          | 1095        | 33.94979                             | 28.01136386                           | 29.9896974                             |
| Pine          | 1100        | 33.10474                             | 27.65390465                           | 29.484395                              |
| Pine          | 1105        | 33.74325                             | 27.45001195                           | 29.18121356                            |
| Pine          | 1110        | 31.972                               | 27.27093141                           | 28.9075081                             |
| Pine          | 1115        | 33.15222                             | 27.23064028                           | 28.82329103                            |
| Pine          | 1120        | 34.77222                             | 26.90745656                           | 28.3390429                             |
| Pine          | 1125        | 33.68279                             | 26.88313507                           | 28.27166924                            |
| Pine          | 1130        | 33.11761                             | 26.94593496                           | 28.32641034                            |
| Pine          | 1135        | 31.4588                              | 26.80613868                           | 28.09060255                            |
| Pine          | 1140        | 29.84261                             | 26.47428153                           | 27.57266759                            |
| Pine          | 1145        | 30.34595                             | 26.5754204                            | 27.67793892                            |
| Pine          | 1150        | 29.94836                             | 26.73257193                           | 27.86321647                            |
| Pine          | 1155        | 31.64864                             | 26.95191641                           | 28.13692194                            |
| Pine          | 1160        | 31.85654                             | 26.83249322                           | 27.91795756                            |
| Pine          | 1165        | 32.37345                             | 26.66413192                           | 27.62319783                            |
| Pine          | 1170        | 30.85759                             | 26.61033493                           | 27.49266138                            |
| Pine          | 1175        | 31.25257                             | 26.53299683                           | 27.32422725                            |
| Pine          | 1180        | 32.18509                             | 26.55115751                           | 27.29475127                            |
| Pine          | 1185        | 32.14901                             | 26.42729067                           | 27.05052178                            |
| Pine          | 1190        | 31.52158                             | 26.36778883                           | 26.89893106                            |
| Pine          | 1195        | 30.00712                             | 26.37454619                           | 26.84418997                            |
| Pine          | 1200        | 28.68202                             | 26.1502683                            | 26.43573719                            |

**Table S2.** Predicted and true values of HRR for Iroko, Pine and Paulownia wood (continuation).

| Sample<br>(-) | Time<br>(s) | HRR CC Ref.<br>(kW m <sup>-2</sup> ) | HRR NN_Model<br>(kW m <sup>-2</sup> ) | HRR nct_Model<br>(kW m <sup>-2</sup> ) |
|---------------|-------------|--------------------------------------|---------------------------------------|----------------------------------------|
| Pine          | 1205        | 29.28329                             | 26.36009659                           | 26.68417754                            |
| Pine          | 1210        | 30.38483                             | 26.6415178                            | 27.03788922                            |
| Pine          | 1215        | 27.81535                             | 26.38638083                           | 26.57469535                            |
| Pine          | 1220        | 30.83846                             | 26.33082404                           | 26.41047207                            |
| Pine          | 1225        | 29.10426                             | 26.24471073                           | 26.19571855                            |
| Pine          | 1230        | 31.28807                             | 26.19379511                           | 26.03149527                            |
| Pine          | 1235        | 30.51767                             | 25.86008758                           | 25.42513239                            |
| Pine          | 1240        | 31.78478                             | 25.79234238                           | 25.22722229                            |
| Pine          | 1245        | 32.57911                             | 26.07554384                           | 25.57251226                            |
| Pine          | 1250        | 31.51276                             | 26.0247515                            | 25.39565642                            |
| Pine          | 1255        | 30.30338                             | 25.58652528                           | 24.6124377                             |
| Pine          | 1260        | 31.30207                             | 25.68243615                           | 24.65875709                            |
| Pine          | 1265        | 30.53078                             | 25.94791239                           | 24.96614938                            |
| Pine          | 1270        | 30.43898                             | 26.09073139                           | 25.07984242                            |
| Pine          | 1275        | 31.328                               | 25.80645031                           | 24.52822064                            |
| Pine          | 1280        | 32.83972                             | 26.0445789                            | 24.78508269                            |
| Pine          | 1285        | 30.41958                             | 26.24632368                           | 24.9829928                             |
| Pine          | 1290        | 29.4413                              | 26.32163645                           | 24.9829928                             |
| Pine          | 1295        | 29.79929                             | 26.34898338                           | 24.90719744                            |
| Pine          | 1300        | 30.84691                             | 25.92205679                           | 24.13240042                            |
| Pine          | 1305        | 29.63594                             | 25.72237572                           | 23.71131509                            |
| Pine          | 1310        | 29.57634                             | 25.65422701                           | 23.49235072                            |
| Pine          | 1315        | 29.73074                             | 25.44297463                           | 23.06284368                            |
| Pine          | 1320        | 29.80618                             | 25.43947285                           | 22.94493978                            |
| Pine          | 1325        | 30.75214                             | 25.96591583                           | 23.61025461                            |
| Pine          | 1330        | 29.86247                             | 25.85649198                           | 23.33233829                            |
| Pine          | 1335        | 29.47731                             | 26.08749049                           | 23.55972437                            |
| Pine          | 1340        | 30.37014                             | 26.18744794                           | 23.5934112                             |
| Pine          | 1345        | 29.90774                             | 26.2184498                            | 23.52603754                            |
| Pine          | 1350        | 29.47472                             | 26.55622199                           | 23.91343605                            |
| Pine          | 1355        | 29.45667                             | 26.12620871                           | 23.17232586                            |
| Pine          | 1360        | 28.27272                             | 25.96400147                           | 22.8354576                             |
| Pine          | 1365        | 28.76724                             | 26.18322908                           | 23.04600026                            |
| Pine          | 1370        | 29.56698                             | 26.41822911                           | 23.28180805                            |
| Pine          | 1375        | 29.76963                             | 26.51699425                           | 23.32391658                            |
| Pine          | 1380        | 28.66635                             | 26.47314833                           | 23.16390416                            |
| Pine          | 1385        | 28.70845                             | 26.52745405                           | 23.14706074                            |
| Pine          | 1390        | 29.23825                             | 26.73397157                           | 23.3491817                             |
| Pine          | 1395        | 27.88834                             | 26.51994647                           | 22.95757234                            |
| Pine          | 1400        | 28.60023                             | 26.99402436                           | 23.54288096                            |



**Table S2.** Predicted and true values of HRR for Iroko, Pine and Paulownia wood (continuation).

| Sample<br>(-) | Time<br>(s) | HRR CC Ref.<br>(kW m <sup>-2</sup> ) | HRR NN_Model<br>(kW m <sup>-2</sup> ) | HRR nct_Model<br>(kW m <sup>-2</sup> ) |
|---------------|-------------|--------------------------------------|---------------------------------------|----------------------------------------|
| Pine          | 1405        | 28.68484                             | 26.82298913                           | 23.2144344                             |
| Pine          | 1410        | 28.9016                              | 26.61163207                           | 22.83966845                            |
| Pine          | 1415        | 28.69697                             | 26.55307493                           | 22.68386688                            |
| Pine          | 1420        | 28.66805                             | 26.7327265                            | 22.85651186                            |
| Pine          | 1425        | 30.18175                             | 26.94052128                           | 23.07126538                            |
| Pine          | 1430        | 28.77699                             | 27.24148892                           | 23.42076621                            |
| Pine          | 1435        | 29.73705                             | 27.42215084                           | 23.60604376                            |
| Pine          | 1440        | 28.95674                             | 27.33008387                           | 23.40813365                            |
| Pine          | 1445        | 28.88829                             | 27.30717545                           | 23.31128402                            |
| Pine          | 1450        | 28.75346                             | 27.32472988                           | 23.27338634                            |
| Pine          | 1455        | 29.03066                             | 27.27950315                           | 23.1512716                             |
| Pine          | 1460        | 28.92399                             | 27.78599725                           | 23.79974301                            |
| Pine          | 1465        | 29.80352                             | 27.81272831                           | 23.77868874                            |
| Pine          | 1470        | 31.04813                             | 27.51206239                           | 23.30286232                            |
| Pine          | 1475        | 29.48858                             | 27.21447317                           | 22.84809016                            |
| Pine          | 1480        | 29.43143                             | 26.84171402                           | 22.31331179                            |
| Pine          | 1485        | 27.85983                             | 26.91891818                           | 22.36805288                            |
| Pine          | 1490        | 27.28747                             | 26.95585068                           | 22.37226373                            |
| Pine          | 1495        | 28.12628                             | 26.90256381                           | 22.26278155                            |
| Pine          | 1500        | 28.87246                             | 27.04690006                           | 22.40595056                            |
| Pine          | 1505        | 28.17988                             | 26.6535024                            | 21.87538304                            |
| Pine          | 1510        | 29.21562                             | 26.34370722                           | 21.46693027                            |
| Pine          | 1515        | 28.43209                             | 26.68365118                           | 21.84169621                            |
| Pine          | 1520        | 28.87683                             | 26.78069718                           | 21.92591328                            |
| Pine          | 1525        | 27.08981                             | 26.64433066                           | 21.72800317                            |
| Pine          | 1530        | 27.0868                              | 26.7304066                            | 21.79958768                            |
| Pine          | 1535        | 27.71388                             | 26.7353605                            | 21.77432256                            |
| Pine          | 1540        | 27.94511                             | 26.57957728                           | 21.55956904                            |
| Pine          | 1545        | 27.33787                             | 26.75046862                           | 21.73221403                            |
| Pine          | 1550        | 26.06188                             | 26.78209266                           | 21.74063573                            |
| Pine          | 1555        | 26.04472                             | 27.05998486                           | 22.04381717                            |
| Pine          | 1560        | 25.67944                             | 27.34350405                           | 22.35963117                            |
| Pine          | 1565        | 25.16396                             | 27.37853385                           | 22.37226373                            |
| Pine          | 1570        | 27.0886                              | 27.61358922                           | 22.63333664                            |
| Pine          | 1575        | 27.9039                              | 26.92809383                           | 21.77432256                            |
| Pine          | 1580        | 26.9142                              | 26.67745042                           | 21.45850856                            |
| Pine          | 1585        | 25.86865                             | 27.18412714                           | 22.02276291                            |
| Pine          | 1590        | 25.17128                             | 27.11037088                           | 21.90906987                            |
| Pine          | 1595        | 26.87248                             | 27.25050464                           | 22.04802803                            |
| Pine          | 1600        | 28.15604                             | 27.08940359                           | 21.83327451                            |

**Table S2.** Predicted and true values of HRR for Iroko, Pine and Paulownia wood (continuation).

| Sample<br>(-) | Time<br>(s) | HRR CC Ref.<br>(kW m <sup>-2</sup> ) | HRR NN_Model<br>(kW m <sup>-2</sup> ) | HRR nct_Model<br>(kW m <sup>-2</sup> ) |
|---------------|-------------|--------------------------------------|---------------------------------------|----------------------------------------|
| Pine          | 1605        | 28.363                               | 27.10368403                           | 21.8248528                             |
| Pine          | 1610        | 28.28351                             | 27.54019851                           | 22.31331179                            |
| Pine          | 1615        | 27.27072                             | 27.70248797                           | 22.48174592                            |
| Pine          | 1620        | 27.26376                             | 27.34520622                           | 22.03118461                            |
| Pine          | 1625        | 27.3741                              | 27.06983957                           | 21.69010549                            |
| Pine          | 1630        | 27.57431                             | 27.2085073                            | 21.8248528                             |
| Pine          | 1635        | 27.52241                             | 27.1400811                            | 21.72379232                            |
| Pine          | 1640        | 27.64561                             | 26.90797631                           | 21.44166515                            |
| Pine          | 1645        | 26.64251                             | 26.53659651                           | 21.01636896                            |
| Pine          | 1650        | 27.62181                             | 26.62151243                           | 21.08795347                            |
| Pine          | 1655        | 27.03105                             | 26.32617748                           | 20.75529605                            |
| Pine          | 1660        | 27.3786                              | 26.45568434                           | 20.87319995                            |
| Pine          | 1665        | 27.26597                             | 26.08806804                           | 20.47316888                            |
| Pine          | 1670        | 27.6949                              | 26.14967471                           | 20.51948827                            |
| Pine          | 1675        | 27.7353                              | 26.26031583                           | 20.61633789                            |
| Pine          | 1680        | 25.95073                             | 26.19048794                           | 20.52790997                            |
| Pine          | 1685        | 26.91449                             | 26.27247072                           | 20.59528363                            |
| Pine          | 1690        | 27.90835                             | 26.41571075                           | 20.72582008                            |
| Pine          | 1695        | 27.52642                             | 26.25898507                           | 20.54896424                            |
| Pine          | 1700        | 27.50936                             | 26.43153388                           | 20.70897667                            |
| Pine          | 1705        | 28.83446                             | 26.24851528                           | 20.50685571                            |
| Pine          | 1710        | 26.14543                             | 26.32215808                           | 20.56580765                            |
| Pine          | 1715        | 26.27924                             | 26.135872                             | 20.36368669                            |
| Pine          | 1720        | 26.78203                             | 25.78688345                           | 20.00576416                            |
| Pine          | 1725        | 26.50935                             | 25.47727473                           | 19.69416102                            |
| Pine          | 1730        | 27.79563                             | 24.80764083                           | 19.05411131                            |
| Pine          | 1735        | 25.39719                             | 25.57358732                           | 19.76153467                            |
| Pine          | 1740        | 25.01489                             | 25.8319782                            | 19.99734245                            |
| Pine          | 1745        | 26.26227                             | 25.77496396                           | 19.9299688                             |
| Pine          | 1750        | 26.87841                             | 25.77445356                           | 19.91733624                            |
| Pine          | 1755        | 25.36614                             | 25.62330408                           | 19.76153467                            |
| Pine          | 1760        | 25.51415                             | 25.59964286                           | 19.72784784                            |
| Pine          | 1765        | 27.71921                             | 25.34171361                           | 19.47519664                            |
| Pine          | 1770        | 25.07797                             | 25.34820549                           | 19.47098579                            |
| Pine          | 1775        | 25.4659                              | 25.31357648                           | 19.42887726                            |
| Pine          | 1780        | 26.38631                             | 25.03980466                           | 19.16780435                            |
| Pine          | 1785        | 26.63656                             | 25.11888009                           | 19.23096715                            |
| Pine          | 1790        | 26.83959                             | 25.18394125                           | 19.28149739                            |
| Pine          | 1795        | 26.68673                             | 24.88723989                           | 19.00358107                            |
| Pine          | 1800        | 26.51815                             | 25.38233682                           | 19.44572067                            |

**Table S2.** Predicted and true values of HRR for Iroko, Pine and Paulownia wood (continuation).

| Sample<br>(-) | Time<br>(s) | HRR CC Ref.<br>(kW m <sup>-2</sup> ) | HRR NN_Model<br>(kW m <sup>-2</sup> ) | HRR nct_Model<br>(kW m <sup>-2</sup> ) |
|---------------|-------------|--------------------------------------|---------------------------------------|----------------------------------------|
| Paulownia     | 0           | 6.938907                             | 0                                     | 0                                      |
| Paulownia     | 5           | 4.005165                             | 0                                     | 0                                      |
| Paulownia     | 10          | 5.297211                             | 0                                     | 0                                      |
| Paulownia     | 15          | 3.041227                             | 0                                     | 0                                      |
| Paulownia     | 20          | 2.344282                             | 0                                     | 0                                      |
| Paulownia     | 25          | 1.270378                             | 0                                     | 0                                      |
| Paulownia     | 30          | 5.194856                             | 0                                     | 0                                      |
| Paulownia     | 35          | 4.033234                             | 0                                     | 0                                      |
| Paulownia     | 40          | 1.635                                | 0                                     | 0                                      |
| Paulownia     | 45          | 0.203688                             | 0                                     | 0                                      |
| Paulownia     | 50          | 0.083099                             | 0                                     | 0                                      |
| Paulownia     | 55          | 0.082124                             | 0                                     | 0                                      |
| Paulownia     | 60          | 0.02015                              | 0                                     | 0                                      |
| Paulownia     | 65          | 1.012949                             | 0                                     | 0                                      |
| Paulownia     | 70          | 3.144003                             | 0                                     | 0                                      |
| Paulownia     | 75          | 2.982001                             | 0                                     | 0                                      |
| Paulownia     | 80          | 2.576306                             | 0                                     | 0                                      |
| Paulownia     | 85          | 2.507884                             | 0                                     | 0                                      |
| Paulownia     | 90          | 3.191031                             | 0                                     | 0                                      |
| Paulownia     | 95          | 4.796626                             | 0                                     | 0                                      |
| Paulownia     | 100         | 3.590138                             | 0                                     | 0                                      |
| Paulownia     | 105         | 1.300314                             | 0                                     | 0                                      |
| Paulownia     | 110         | 1.470114                             | 0                                     | 0                                      |
| Paulownia     | 115         | 1.234413                             | 0                                     | 0                                      |
| Paulownia     | 120         | 0.05002                              | 0                                     | 0                                      |
| Paulownia     | 125         | 0.18266                              | 0                                     | 0                                      |
| Paulownia     | 130         | 0.25767                              | 0                                     | 0                                      |
| Paulownia     | 135         | 1.02531                              | 0                                     | 0                                      |
| Paulownia     | 140         | 0.485333                             | 0                                     | 0                                      |
| Paulownia     | 145         | 7.642197                             | 0                                     | 0                                      |
| Paulownia     | 150         | 5.080558                             | 0                                     | 0                                      |
| Paulownia     | 155         | 12.47628                             | 0                                     | 0                                      |
| Paulownia     | 160         | 128.1825                             | 144.9742461                           | 21.8981545                             |
| Paulownia     | 165         | 157.3037                             | 161.1656048                           | 41.02701592                            |
| Paulownia     | 170         | 140.0899                             | 148.0641368                           | 50.64837777                            |
| Paulownia     | 175         | 119.8374                             | 137.4361426                           | 56.50008516                            |
| Paulownia     | 180         | 104.0381                             | 128.6502019                           | 58.89525935                            |
| Paulownia     | 185         | 92.68281                             | 120.4750543                           | 59.52556834                            |
| Paulownia     | 190         | 86.61987                             | 112.6376685                           | 59.01318813                            |
| Paulownia     | 195         | 78.13028                             | 105.4747818                           | 58.19581969                            |
| Paulownia     | 200         | 73.01549                             | 98.60167773                           | 56.66681206                            |

**Table S2.** Predicted and true values of HRR for Iroko, Pine and Paulownia wood (continuation).

| Sample<br>(-) | Time<br>(s) | HRR CC Ref.<br>(kW m <sup>-2</sup> ) | HRR NN_Model<br>(kW m <sup>-2</sup> ) | HRR nct_Model<br>(kW m <sup>-2</sup> ) |
|---------------|-------------|--------------------------------------|---------------------------------------|----------------------------------------|
| Paulownia     | 205         | 68.72099                             | 92.29580427                           | 54.80028412                            |
| Paulownia     | 210         | 67.05401                             | 86.91225742                           | 53.19807932                            |
| Paulownia     | 215         | 62.17346                             | 82.29687196                           | 51.80326651                            |
| Paulownia     | 220         | 58.4138                              | 78.29773192                           | 50.538582                              |
| Paulownia     | 225         | 56.7006                              | 74.48141137                           | 48.66392105                            |
| Paulownia     | 230         | 56.00348                             | 71.12328307                           | 47.06171625                            |
| Paulownia     | 235         | 54.17822                             | 68.30708428                           | 46.02475629                            |
| Paulownia     | 240         | 54.10898                             | 65.83253211                           | 45.17485577                            |
| Paulownia     | 245         | 51.88463                             | 63.68965677                           | 44.5160812                             |
| Paulownia     | 250         | 50.58516                             | 61.26699411                           | 43.23106415                            |
| Paulownia     | 255         | 50.53612                             | 59.25181809                           | 42.35269807                            |
| Paulownia     | 260         | 49.65082                             | 57.1806148                            | 41.29540556                            |
| Paulownia     | 265         | 49.89173                             | 55.46684033                           | 40.54310127                            |
| Paulownia     | 270         | 51.1296                              | 54.06210509                           | 40.01445502                            |
| Paulownia     | 275         | 50.5646                              | 53.07228709                           | 39.80299651                            |
| Paulownia     | 280         | 46.1755                              | 51.62435378                           | 39.06695827                            |
| Paulownia     | 285         | 45.16444                             | 50.12776825                           | 38.24145681                            |
| Paulownia     | 290         | 46.15127                             | 48.94854766                           | 37.66401243                            |
| Paulownia     | 295         | 44.7721                              | 47.95046645                           | 37.20449684                            |
| Paulownia     | 300         | 44.21795                             | 46.9820693                            | 36.73278172                            |
| Paulownia     | 305         | 40.37734                             | 45.73318146                           | 35.99267697                            |
| Paulownia     | 310         | 39.95859                             | 44.88984557                           | 35.56975996                            |
| Paulownia     | 315         | 40.00805                             | 44.25826974                           | 35.29730381                            |
| Paulownia     | 320         | 38.32813                             | 43.28447721                           | 34.71985944                            |
| Paulownia     | 325         | 38.36535                             | 42.19687672                           | 34.03261931                            |
| Paulownia     | 330         | 36.90887                             | 41.49230065                           | 33.64223438                            |
| Paulownia     | 335         | 32.84791                             | 40.01973635                           | 32.61340744                            |
| Paulownia     | 340         | 31.12939                             | 38.32782631                           | 31.39345454                            |
| Paulownia     | 345         | 37.31471                             | 37.53115                              | 30.88514084                            |
| Paulownia     | 350         | 36.5462                              | 36.73583633                           | 30.3646276                             |
| Paulownia     | 355         | 35.24073                             | 35.38596387                           | 29.37646575                            |
| Paulownia     | 360         | 37.04883                             | 34.97383676                           | 29.1446747                             |
| Paulownia     | 365         | 31.88837                             | 33.92536777                           | 28.37610438                            |
| Paulownia     | 370         | 30.61557                             | 33.06026155                           | 27.74579538                            |
| Paulownia     | 375         | 29.89264                             | 31.96995741                           | 26.9121609                             |
| Paulownia     | 380         | 27.45902                             | 31.45226467                           | 26.55024154                            |
| Paulownia     | 385         | 27.13414                             | 30.79729476                           | 26.06226039                            |
| Paulownia     | 390         | 26.97345                             | 30.00794357                           | 25.44821743                            |
| Paulownia     | 395         | 27.70795                             | 29.71685803                           | 25.25709147                            |
| Paulownia     | 400         | 26.72208                             | 29.841745                             | 25.42381837                            |

**Table S2.** Predicted and true values of HRR for Iroko, Pine and Paulownia wood (continuation).

| Sample<br>(-) | Time<br>(s) | HRR CC Ref.<br>(kW m <sup>-2</sup> ) | HRR NN_Model<br>(kW m <sup>-2</sup> ) | HRR nct_Model<br>(kW m <sup>-2</sup> ) |
|---------------|-------------|--------------------------------------|---------------------------------------|----------------------------------------|
| Paulownia     | 405         | 24.81392                             | 28.40930667                           | 24.22013151                            |
| Paulownia     | 410         | 24.911                               | 27.77274989                           | 23.70368478                            |
| Paulownia     | 415         | 22.09933                             | 27.07744174                           | 23.12624041                            |
| Paulownia     | 420         | 21.78667                             | 26.36013394                           | 22.52033047                            |
| Paulownia     | 425         | 22.09356                             | 26.10288039                           | 22.32513801                            |
| Paulownia     | 430         | 21.08518                             | 25.12430331                           | 21.46710447                            |
| Paulownia     | 435         | 19.00575                             | 23.86358553                           | 20.3406813                             |
| Paulownia     | 440         | 17.71543                             | 23.12642979                           | 19.69003975                            |
| Paulownia     | 445         | 18.34388                             | 22.33863157                           | 18.99060009                            |
| Paulownia     | 450         | 17.57426                             | 21.50624972                           | 18.25049534                            |
| Paulownia     | 455         | 16.62642                             | 21.12287515                           | 17.92110805                            |
| Paulownia     | 460         | 16.96059                             | 21.06638218                           | 17.88857598                            |
| Paulownia     | 465         | 15.78695                             | 20.52804418                           | 17.41686086                            |
| Paulownia     | 470         | 15.96713                             | 20.18193532                           | 17.12000565                            |
| Paulownia     | 475         | 16.90279                             | 19.9847849                            | 16.95734527                            |
| Paulownia     | 480         | 15.95235                             | 19.9462642                            | 16.93701272                            |
| Paulownia     | 485         | 15.59463                             | 19.93101092                           | 16.93701272                            |
| Paulownia     | 490         | 14.68659                             | 19.76770611                           | 16.8028179                             |
| Paulownia     | 495         | 15.04131                             | 19.49633704                           | 16.57102685                            |
| Paulownia     | 500         | 15.95907                             | 19.46962375                           | 16.55882732                            |
| Paulownia     | 505         | 16.24248                             | 19.47504727                           | 16.57509336                            |
| Paulownia     | 510         | 16.19921                             | 19.20484429                           | 16.34330231                            |
| Paulownia     | 515         | 15.8899                              | 19.25207312                           | 16.39616693                            |
| Paulownia     | 520         | 15.65997                             | 19.22713232                           | 16.3839674                             |
| Paulownia     | 525         | 15.88142                             | 19.31547539                           | 16.47343062                            |
| Paulownia     | 530         | 16.16473                             | 19.03330216                           | 16.22944004                            |
| Paulownia     | 535         | 15.26422                             | 18.47223156                           | 15.73739237                            |
| Paulownia     | 540         | 15.13438                             | 18.44863163                           | 15.72519284                            |
| Paulownia     | 545         | 15.64552                             | 18.36121388                           | 15.65606218                            |
| Paulownia     | 550         | 16.71463                             | 18.4976585                            | 15.78619048                            |
| Paulownia     | 555         | 15.29649                             | 18.16381381                           | 15.4974683                             |
| Paulownia     | 560         | 15.44969                             | 17.6953837                            | 15.09081733                            |
| Paulownia     | 565         | 14.4723                              | 17.59889838                           | 15.01355365                            |
| Paulownia     | 570         | 14.20662                             | 17.04016159                           | 14.529639                              |
| Paulownia     | 575         | 16.29616                             | 17.90226487                           | 15.29820933                            |
| Paulownia     | 580         | 15.65021                             | 18.74778748                           | 16.06271314                            |
| Paulownia     | 585         | 14.9261                              | 18.64282412                           | 15.97731644                            |
| Paulownia     | 590         | 14.2429                              | 18.7860545                            | 16.11557777                            |
| Paulownia     | 595         | 14.29354                             | 18.39154784                           | 15.76992445                            |
| Paulownia     | 600         | 15.16336                             | 18.34484307                           | 15.73739237                            |

**Table S2.** Predicted and true values of HRR for Iroko, Pine and Paulownia wood (continuation).

| Sample<br>(-) | Time<br>(s) | HRR CC Ref.<br>(kW m <sup>-2</sup> ) | HRR NN_Model<br>(kW m <sup>-2</sup> ) | HRR nct_Model<br>(kW m <sup>-2</sup> ) |
|---------------|-------------|--------------------------------------|---------------------------------------|----------------------------------------|
| Paulownia     | 605         | 14.46861                             | 18.72234489                           | 16.0871122                             |
| Paulownia     | 610         | 16.87608                             | 18.61204444                           | 15.99764899                            |
| Paulownia     | 615         | 15.91141                             | 18.65000354                           | 16.04238059                            |
| Paulownia     | 620         | 15.76073                             | 18.46702959                           | 15.88785323                            |
| Paulownia     | 625         | 16.57893                             | 18.43229143                           | 15.86752068                            |
| Paulownia     | 630         | 15.84607                             | 18.63090437                           | 16.05864663                            |
| Paulownia     | 635         | 14.94546                             | 18.3975717                            | 15.85938766                            |
| Paulownia     | 640         | 15.63                                | 18.44689388                           | 15.91631879                            |
| Paulownia     | 645         | 14.39776                             | 17.96469354                           | 15.49340179                            |
| Paulownia     | 650         | 14.76859                             | 18.48078565                           | 15.97324993                            |
| Paulownia     | 655         | 14.52662                             | 18.78259294                           | 16.26197211                            |
| Paulownia     | 660         | 15.10908                             | 18.77974402                           | 16.27417164                            |
| Paulownia     | 665         | 15.10895                             | 19.10468572                           | 16.58729289                            |
| Paulownia     | 670         | 14.99928                             | 19.10015201                           | 16.59949242                            |
| Paulownia     | 675         | 14.69078                             | 18.82920557                           | 16.36770137                            |
| Paulownia     | 680         | 15.82575                             | 18.7347919                            | 16.2985707                             |
| Paulownia     | 685         | 16.96879                             | 18.74610825                           | 16.32703627                            |
| Paulownia     | 690         | 19.69124                             | 18.13510023                           | 15.78619048                            |
| Paulownia     | 695         | 22.99126                             | 19.02208903                           | 16.61982496                            |
| Paulownia     | 700         | 22.14672                             | 19.94416871                           | 17.49819105                            |
| Paulownia     | 705         | 19.4105                              | 20.11953002                           | 17.68525049                            |
| Paulownia     | 710         | 17.23472                             | 20.05122744                           | 17.6445854                             |
| Paulownia     | 715         | 17.49824                             | 19.7046839                            | 17.34366368                            |
| Paulownia     | 720         | 15.69549                             | 19.75195582                           | 17.41279435                            |
| Paulownia     | 725         | 16.56261                             | 19.81545198                           | 17.49819105                            |
| Paulownia     | 730         | 16.94068                             | 20.13623784                           | 17.82757833                            |
| Paulownia     | 735         | 15.12796                             | 20.20541835                           | 17.92110805                            |
| Paulownia     | 740         | 16.98923                             | 20.43158048                           | 18.16509863                            |
| Paulownia     | 745         | 17.9319                              | 20.49372059                           | 18.25456185                            |
| Paulownia     | 750         | 19.44275                             | 20.33761049                           | 18.13663307                            |
| Paulownia     | 755         | 19.19548                             | 20.22770794                           | 18.06343589                            |
| Paulownia     | 760         | 18.99484                             | 20.10016331                           | 17.97397268                            |
| Paulownia     | 765         | 20.16209                             | 20.44752764                           | 18.33995855                            |
| Paulownia     | 770         | 18.30799                             | 20.60174401                           | 18.52295148                            |
| Paulownia     | 775         | 20.56233                             | 20.80885952                           | 18.75880904                            |
| Paulownia     | 780         | 22.06593                             | 20.82555462                           | 18.81167367                            |
| Paulownia     | 785         | 23.97476                             | 20.97088278                           | 18.99060009                            |
| Paulownia     | 790         | 22.26753                             | 20.97318408                           | 19.03126519                            |
| Paulownia     | 795         | 23.79308                             | 20.71699264                           | 18.81980669                            |
| Paulownia     | 800         | 22.1327                              | 20.99655465                           | 19.13292793                            |

**Table S2.** Predicted and true values of HRR for Iroko, Pine and Paulownia wood (continuation).

| Sample<br>(-) | Time<br>(s) | HRR CC Ref.<br>(kW m <sup>-2</sup> ) | HRR NN_Model<br>(kW m <sup>-2</sup> ) | HRR nct_Model<br>(kW m <sup>-2</sup> ) |
|---------------|-------------|--------------------------------------|---------------------------------------|----------------------------------------|
| Paulownia     | 805         | 22.71251                             | 20.81507606                           | 18.9946666                             |
| Paulownia     | 810         | 23.74234                             | 21.38752849                           | 19.60057654                            |
| Paulownia     | 815         | 24.86269                             | 21.12780958                           | 19.38505153                            |
| Paulownia     | 820         | 24.85444                             | 21.17976894                           | 19.47858125                            |
| Paulownia     | 825         | 24.48703                             | 21.2351709                            | 19.57617748                            |
| Paulownia     | 830         | 25.21344                             | 21.63855655                           | 20.02349355                            |
| Paulownia     | 835         | 25.58523                             | 21.79637341                           | 20.22681903                            |
| Paulownia     | 840         | 25.7337                              | 21.96489259                           | 20.44234404                            |
| Paulownia     | 845         | 24.78037                             | 21.88815717                           | 20.40981196                            |
| Paulownia     | 850         | 24.73012                             | 21.83983055                           | 20.40574545                            |
| Paulownia     | 855         | 25.1595                              | 21.91906864                           | 20.53180725                            |
| Paulownia     | 860         | 23.33781                             | 21.72472548                           | 20.37727989                            |
| Paulownia     | 865         | 22.26931                             | 21.88708797                           | 20.58873839                            |
| Paulownia     | 870         | 21.96148                             | 21.90706882                           | 20.65380254                            |
| Paulownia     | 875         | 21.63857                             | 21.32425493                           | 20.09262421                            |
| Paulownia     | 880         | 21.8185                              | 20.90573299                           | 19.69817277                            |
| Paulownia     | 885         | 21.26479                             | 20.5649223                            | 19.38098502                            |
| Paulownia     | 890         | 21.11754                             | 20.44134082                           | 19.2874553                             |
| Paulownia     | 895         | 21.15665                             | 20.59037083                           | 19.47858125                            |
| Paulownia     | 900         | 22.35088                             | 20.88477626                           | 19.82423457                            |
| Paulownia     | 905         | 21.54479                             | 21.31434482                           | 20.31628224                            |
| Paulownia     | 910         | 21.42225                             | 21.75904753                           | 20.82866246                            |
| Paulownia     | 915         | 21.35663                             | 21.8529862                            | 20.96692379                            |
| Paulownia     | 920         | 21.75682                             | 21.66166565                           | 20.79613038                            |
| Paulownia     | 925         | 22.80562                             | 21.44705006                           | 20.59687141                            |
| Paulownia     | 930         | 24.27144                             | 21.37333952                           | 20.54807329                            |
| Paulownia     | 935         | 23.19913                             | 21.30897641                           | 20.5074082                             |
| Paulownia     | 940         | 22.31437                             | 21.4859422                            | 20.73106623                            |
| Paulownia     | 945         | 22.55315                             | 21.69527172                           | 20.99132284                            |
| Paulownia     | 950         | 23.38487                             | 21.75068527                           | 21.08078606                            |
| Paulownia     | 955         | 22.6759                              | 21.73797889                           | 21.09298559                            |
| Paulownia     | 960         | 20.46118                             | 21.86376427                           | 21.25971248                            |
| Paulownia     | 965         | 20.17739                             | 21.87123536                           | 21.29224456                            |
| Paulownia     | 970         | 20.70927                             | 21.65873575                           | 21.07265304                            |
| Paulownia     | 975         | 21.85605                             | 21.51725609                           | 20.9303252                             |
| Paulownia     | 980         | 22.02394                             | 21.27616947                           | 20.67006858                            |
| Paulownia     | 985         | 21.51221                             | 21.27095354                           | 20.6782016                             |
| Paulownia     | 990         | 20.80907                             | 21.23223812                           | 20.64566952                            |
| Paulownia     | 995         | 20.55479                             | 21.15707044                           | 20.56840584                            |
| Paulownia     | 1000        | 20.93282                             | 21.3816764                            | 20.84086199                            |

**Table S2.** Predicted and true values of HRR for Iroko, Pine and Paulownia wood (continuation).

| Sample<br>(-) | Time<br>(s) | HRR CC Ref.<br>(kW m <sup>-2</sup> ) | HRR NN_Model<br>(kW m <sup>-2</sup> ) | HRR nct_Model<br>(kW m <sup>-2</sup> ) |
|---------------|-------------|--------------------------------------|---------------------------------------|----------------------------------------|
| Paulownia     | 1005        | 20.75599                             | 21.52618372                           | 21.01978841                            |
| Paulownia     | 1010        | 21.72012                             | 21.82815467                           | 21.38577428                            |
| Paulownia     | 1015        | 22.05781                             | 21.88651116                           | 21.46303796                            |
| Paulownia     | 1020        | 20.90756                             | 22.08808654                           | 21.71109505                            |
| Paulownia     | 1025        | 21.5695                              | 22.1304169                            | 21.76802619                            |
| Paulownia     | 1030        | 22.37396                             | 22.08970774                           | 21.72329458                            |
| Paulownia     | 1035        | 22.55843                             | 22.10752776                           | 21.74769364                            |
| Paulownia     | 1040        | 22.73616                             | 21.95024267                           | 21.55656769                            |
| Paulownia     | 1045        | 23.21571                             | 22.0439354                            | 21.67042996                            |
| Paulownia     | 1050        | 22.04207                             | 21.70668809                           | 21.25157946                            |
| Paulownia     | 1055        | 21.08359                             | 21.65243634                           | 21.17838229                            |
| Paulownia     | 1060        | 19.78508                             | 21.76291724                           | 21.3085106                             |
| Paulownia     | 1065        | 19.70459                             | 22.01637195                           | 21.61756533                            |
| Paulownia     | 1070        | 21.00212                             | 22.16208353                           | 21.79242525                            |
| Paulownia     | 1075        | 21.01682                             | 22.03421198                           | 21.62163184                            |
| Paulownia     | 1080        | 22.17928                             | 22.00791547                           | 21.57690023                            |
| Paulownia     | 1085        | 21.16819                             | 22.05626008                           | 21.62569835                            |
| Paulownia     | 1090        | 21.56017                             | 21.77866755                           | 21.25564597                            |
| Paulownia     | 1095        | 21.13816                             | 21.63099822                           | 21.04825398                            |
| Paulownia     | 1100        | 21.9283                              | 21.78407165                           | 21.2271804                             |
| Paulownia     | 1105        | 22.12932                             | 21.74295829                           | 21.15398323                            |
| Paulownia     | 1110        | 20.77734                             | 21.9336005                            | 21.38170777                            |
| Paulownia     | 1115        | 21.61355                             | 22.09571889                           | 21.57283373                            |
| Paulownia     | 1120        | 22.47394                             | 22.08142483                           | 21.53216863                            |
| Paulownia     | 1125        | 22.68087                             | 22.08051653                           | 21.50776957                            |
| Paulownia     | 1130        | 21.18467                             | 21.93979016                           | 21.29631107                            |
| Paulownia     | 1135        | 22.17944                             | 22.27664106                           | 21.71922807                            |
| Paulownia     | 1140        | 22.18057                             | 22.22607777                           | 21.62569835                            |
| Paulownia     | 1145        | 22.2344                              | 22.2463789                            | 21.62569835                            |
| Paulownia     | 1150        | 22.12474                             | 22.19514766                           | 21.52810212                            |
| Paulownia     | 1155        | 21.67589                             | 22.28312074                           | 21.61756533                            |
| Paulownia     | 1160        | 20.42943                             | 22.44891679                           | 21.81275779                            |
| Paulownia     | 1165        | 19.56298                             | 22.47738776                           | 21.82089081                            |
| Paulownia     | 1170        | 19.44714                             | 22.31980286                           | 21.57283373                            |
| Paulownia     | 1175        | 20.37999                             | 22.3620215                            | 21.59723278                            |
| Paulownia     | 1180        | 19.30183                             | 22.61055393                           | 21.90628752                            |
| Paulownia     | 1185        | 20.22378                             | 22.94320091                           | 22.33327103                            |
| Paulownia     | 1190        | 19.44491                             | 23.1341223                            | 22.56506208                            |
| Paulownia     | 1195        | 20.58336                             | 23.02149947                           | 22.37393613                            |
| Paulownia     | 1200        | 19.94143                             | 22.94542167                           | 22.23160829                            |



**Table S2.** Predicted and true values of HRR for Iroko, Pine and Paulownia wood (continuation).

| Sample<br>(-) | Time<br>(s) | HRR CC Ref.<br>(kW m <sup>-2</sup> ) | HRR NN_Model<br>(kW m <sup>-2</sup> ) | HRR nct_Model<br>(kW m <sup>-2</sup> ) |
|---------------|-------------|--------------------------------------|---------------------------------------|----------------------------------------|
| Paulownia     | 1205        | 19.3653                              | 22.88519317                           | 22.109613                              |
| Paulownia     | 1210        | 19.39629                             | 23.05644387                           | 22.31293848                            |
| Paulownia     | 1215        | 19.16974                             | 23.03511584                           | 22.24380782                            |
| Paulownia     | 1220        | 19.45247                             | 22.96331564                           | 22.10147998                            |
| Paulownia     | 1225        | 18.54538                             | 23.11494835                           | 22.2763399                             |
| Paulownia     | 1230        | 18.8007                              | 23.00239118                           | 22.07301441                            |
| Paulownia     | 1235        | 17.66166                             | 23.04980938                           | 22.09741347                            |
| Paulownia     | 1240        | 17.70983                             | 23.1625947                            | 22.21534225                            |
| Paulownia     | 1245        | 19.22295                             | 23.28675039                           | 22.34953707                            |
| Paulownia     | 1250        | 19.30979                             | 23.24559555                           | 22.24380782                            |
| Paulownia     | 1255        | 18.5289                              | 23.32011975                           | 22.30480546                            |
| Paulownia     | 1260        | 18.44321                             | 23.3839243                            | 22.34953707                            |
| Paulownia     | 1265        | 18.68985                             | 23.31484008                           | 22.19907621                            |
| Paulownia     | 1270        | 17.846                               | 23.39115041                           | 22.26007386                            |
| Paulownia     | 1275        | 18.01433                             | 23.18029398                           | 21.8981545                             |
| Paulownia     | 1280        | 18.08626                             | 22.95981692                           | 21.5199691                             |
| Paulownia     | 1285        | 20.47661                             | 23.17160297                           | 21.77615921                            |
| Paulownia     | 1290        | 19.33005                             | 23.31721442                           | 21.93475308                            |
| Paulownia     | 1295        | 19.68103                             | 23.58378909                           | 22.27227339                            |
| Paulownia     | 1300        | 17.50918                             | 23.71885866                           | 22.41460122                            |
| Paulownia     | 1305        | 19.18387                             | 23.67152572                           | 22.28447291                            |
| Paulownia     | 1310        | 19.71674                             | 23.69083965                           | 22.25194084                            |
| Paulownia     | 1315        | 19.85022                             | 23.77656225                           | 22.31700499                            |
| Paulownia     | 1320        | 19.60734                             | 23.76523306                           | 22.2356748                             |
| Paulownia     | 1325        | 19.03769                             | 23.79855793                           | 22.21940876                            |
| Paulownia     | 1330        | 19.16651                             | 23.85201419                           | 22.23160829                            |
| Paulownia     | 1335        | 19.69135                             | 23.98532315                           | 22.3617366                             |
| Paulownia     | 1340        | 19.40835                             | 24.26856958                           | 22.71552294                            |
| Paulownia     | 1345        | 19.47474                             | 24.47139546                           | 22.94731399                            |
| Paulownia     | 1350        | 18.95547                             | 24.39715737                           | 22.76025454                            |
| Paulownia     | 1355        | 17.49097                             | 24.57830149                           | 22.95544701                            |
| Paulownia     | 1360        | 16.44729                             | 24.63121765                           | 22.95544701                            |
| Paulownia     | 1365        | 16.23819                             | 24.62619668                           | 22.8659838                             |
| Paulownia     | 1370        | 16.60898                             | 24.73887073                           | 22.9513805                             |
| Paulownia     | 1375        | 17.95313                             | 24.75850981                           | 22.89444936                            |
| Paulownia     | 1380        | 19.38912                             | 24.84733416                           | 22.93918097                            |
| Paulownia     | 1385        | 19.78953                             | 24.76696293                           | 22.72772247                            |
| Paulownia     | 1390        | 20.03116                             | 24.89155002                           | 22.82125219                            |
| Paulownia     | 1395        | 20.78008                             | 25.13457134                           | 23.08964183                            |
| Paulownia     | 1400        | 18.88366                             | 25.28975879                           | 23.22383665                            |

**Table S2.** Predicted and true values of HRR for Iroko, Pine and Paulownia wood (continuation).

| Sample<br>(-) | Time<br>(s) | HRR CC Ref.<br>(kW m <sup>-2</sup> ) | HRR NN_Model<br>(kW m <sup>-2</sup> ) | HRR nct_Model<br>(kW m <sup>-2</sup> ) |
|---------------|-------------|--------------------------------------|---------------------------------------|----------------------------------------|
| Paulownia     | 1405        | 17.70488                             | 25.30542133                           | 23.14657296                            |
| Paulownia     | 1410        | 18.78618                             | 25.33875394                           | 23.09370834                            |
| Paulownia     | 1415        | 18.10491                             | 25.46897134                           | 23.18317155                            |
| Paulownia     | 1420        | 17.73456                             | 25.46404672                           | 23.06930928                            |
| Paulownia     | 1425        | 17.76455                             | 25.41870701                           | 22.89444936                            |
| Paulownia     | 1430        | 17.6533                              | 25.19309199                           | 22.45526632                            |
| Paulownia     | 1435        | 18.36309                             | 25.34519111                           | 22.56912859                            |
| Paulownia     | 1440        | 17.00047                             | 25.39235994                           | 22.52846349                            |
| Paulownia     | 1445        | 18.02283                             | 25.46819535                           | 22.52846349                            |
| Paulownia     | 1450        | 19.09431                             | 25.5728071                            | 22.56912859                            |
| Paulownia     | 1455        | 18.31105                             | 25.68367581                           | 22.61792671                            |
| Paulownia     | 1460        | 17.37636                             | 25.77243245                           | 22.63419275                            |
| Paulownia     | 1465        | 17.68787                             | 25.90664633                           | 22.71552294                            |
| Paulownia     | 1470        | 17.91417                             | 25.85649198                           | 22.53253                               |
| Paulownia     | 1475        | 18.92005                             | 26.12436642                           | 22.80498615                            |
| Paulownia     | 1480        | 19.06807                             | 26.0933933                            | 22.65045878                            |
| Paulownia     | 1485        | 18.00239                             | 26.34381619                           | 22.89851587                            |
| Paulownia     | 1490        | 18.52817                             | 26.51372527                           | 23.03271069                            |
| Paulownia     | 1495        | 18.17121                             | 26.45229174                           | 22.83751823                            |
| Paulownia     | 1500        | 19.07569                             | 26.7402919                            | 23.14250645                            |
| Paulownia     | 1505        | 19.04458                             | 26.92140681                           | 23.29703382                            |
| Paulownia     | 1510        | 16.87946                             | 27.17430093                           | 23.55729044                            |
| Paulownia     | 1515        | 15.8896                              | 27.20019767                           | 23.49222628                            |
| Paulownia     | 1520        | 17.27712                             | 27.1818089                            | 23.36616448                            |
| Paulownia     | 1525        | 16.23376                             | 26.98045147                           | 22.98391258                            |
| Paulownia     | 1530        | 17.03611                             | 26.79569119                           | 22.63419275                            |
| Paulownia     | 1535        | 17.16496                             | 26.86192273                           | 22.63825925                            |
| Paulownia     | 1540        | 16.95604                             | 27.04963315                           | 22.81311917                            |
| Paulownia     | 1545        | 16.90121                             | 27.272792                             | 23.04084371                            |
| Paulownia     | 1550        | 15.97823                             | 27.2907425                            | 22.98391258                            |
| Paulownia     | 1555        | 17.47592                             | 27.48684077                           | 23.17910504                            |
| Paulownia     | 1560        | 17.36569                             | 27.44346307                           | 23.04084371                            |
| Paulownia     | 1565        | 17.27603                             | 27.45017017                           | 22.97577956                            |
| Paulownia     | 1570        | 18.232                               | 27.44607204                           | 22.89851587                            |
| Paulownia     | 1575        | 19.08029                             | 27.61936086                           | 23.06930928                            |
| Paulownia     | 1580        | 17.71082                             | 27.54153345                           | 22.89444936                            |
| Paulownia     | 1585        | 18.134                               | 27.76198251                           | 23.13437343                            |
| Paulownia     | 1590        | 16.42503                             | 27.76081326                           | 23.06930928                            |
| Paulownia     | 1595        | 17.15928                             | 27.7431523                            | 22.98391258                            |
| Paulownia     | 1600        | 18.44418                             | 27.93620791                           | 23.19130457                            |

**Table S2.** Predicted and true values of HRR for Iroko, Pine and Paulownia wood (continuation).

| Sample<br>(-) | Time<br>(s) | HRR CC Ref.<br>(kW m <sup>-2</sup> ) | HRR NN_Model<br>(kW m <sup>-2</sup> ) | HRR nct_Model<br>(kW m <sup>-2</sup> ) |
|---------------|-------------|--------------------------------------|---------------------------------------|----------------------------------------|
| Paulownia     | 1605        | 17.55244                             | 28.17030937                           | 23.45969421                            |
| Paulownia     | 1610        | 17.08319                             | 28.44971583                           | 23.79721451                            |
| Paulownia     | 1615        | 16.85447                             | 28.47842137                           | 23.78094847                            |
| Paulownia     | 1620        | 16.3002                              | 28.4515661                            | 23.68741875                            |
| Paulownia     | 1625        | 17.15659                             | 28.57268329                           | 23.80534753                            |
| Paulownia     | 1630        | 17.15688                             | 28.66409918                           | 23.88261121                            |
| Paulownia     | 1635        | 17.58587                             | 28.71753673                           | 23.90701027                            |
| Paulownia     | 1640        | 18.44177                             | 28.79012002                           | 23.95987489                            |
| Paulownia     | 1645        | 17.00758                             | 28.79065245                           | 23.91107678                            |
| Paulownia     | 1650        | 16.79361                             | 29.17241553                           | 24.41125746                            |
| Paulownia     | 1655        | 16.98095                             | 29.07976928                           | 24.22826453                            |
| Paulownia     | 1660        | 16.06487                             | 29.05334995                           | 24.14286783                            |
| Paulownia     | 1665        | 16.21493                             | 29.11973298                           | 24.19166594                            |
| Paulownia     | 1670        | 16.15284                             | 29.16859731                           | 24.216065                              |
| Paulownia     | 1675        | 16.30519                             | 29.17728368                           | 24.18353292                            |
| Paulownia     | 1680        | 15.72857                             | 29.20249366                           | 24.1753999                             |
| Paulownia     | 1685        | 15.9913                              | 29.32379377                           | 24.30552821                            |
| Paulownia     | 1690        | 16.09007                             | 29.29720456                           | 24.22419802                            |
| Paulownia     | 1695        | 15.96362                             | 29.24694195                           | 24.11033575                            |
| Paulownia     | 1700        | 15.53091                             | 29.28771181                           | 24.12660179                            |
| Paulownia     | 1705        | 16.45571                             | 29.31957591                           | 24.1306683                             |
| Paulownia     | 1710        | 17.57239                             | 29.2992938                            | 24.06153763                            |
| Paulownia     | 1715        | 17.16178                             | 29.44276786                           | 24.22419802                            |
| Paulownia     | 1720        | 18.1348                              | 29.37889687                           | 24.09406971                            |
| Paulownia     | 1725        | 16.98467                             | 29.43571435                           | 24.13473481                            |
| Paulownia     | 1730        | 17.00079                             | 29.42287129                           | 24.07780367                            |
| Paulownia     | 1735        | 16.7265                              | 29.56605302                           | 24.24046406                            |
| Paulownia     | 1740        | 17.27082                             | 29.76525151                           | 24.48445464                            |
| Paulownia     | 1745        | 18.45484                             | 29.61499927                           | 24.23233104                            |
| Paulownia     | 1750        | 17.19297                             | 29.52573904                           | 24.06967065                            |
| Paulownia     | 1755        | 16.30015                             | 29.59633164                           | 24.1306683                             |
| Paulownia     | 1760        | 15.93581                             | 29.85441587                           | 24.45598907                            |
| Paulownia     | 1765        | 14.91738                             | 29.83822085                           | 24.39499143                            |
| Paulownia     | 1770        | 14.07631                             | 29.92245004                           | 24.47632162                            |
| Paulownia     | 1775        | 17.11153                             | 29.83359114                           | 24.31366123                            |
| Paulownia     | 1780        | 17.55776                             | 29.79285303                           | 24.22013151                            |
| Paulownia     | 1785        | 16.94576                             | 29.73952827                           | 24.11033575                            |
| Paulownia     | 1790        | 17.3667                              | 29.67922309                           | 23.99240697                            |
| Paulownia     | 1795        | 17.08016                             | 29.51172053                           | 23.73215035                            |
| Paulownia     | 1800        | 17.26483                             | 29.64904735                           | 23.88261121                            |

Notice: HRR CC Ref.: data measured by the cone calorimeter in accordance with ISO 5660-1:2015; HRR NN\_Model: data predicted by trained neural network; nct\_Model: data predicted from average molar heat capacity, average chemical amount and temperature rise.
